# Supplementary material for: Gender-specific prevalence and associated factors of hypertension among elderly Bangladeshi people: findings from a nationally representative cross-sectional survey
Source: PubMed Central journal article supplement — BMJ Open. 2021 Jan 21;11(1):e038326. doi: 10.1136/bmjopen-2020-038326 (PMC7825269; doi:10.1136/bmjopen-2020-038326), 2021-01-21
Supplement: bmjopen-2020-038326.draft_revisions.pdf [file bmjopen-2020-038326.draft_revisions.pdf]

# BMJ Open

BMJ Open is committed to open peer review. As part of this commitment we make the peer review history of every article we publish publicly available.

When an article is published we post the peer reviewers' comments and the authors' responses online. We also post the versions of the paper that were used during peer review. These are the versions that the peer review comments apply to.

The versions of the paper that follow are the versions that were submitted during the peer review process. They are not the versions of record or the final published versions. They should not be cited or distributed as the published version of this manuscript.

BMJ Open is an open access journal and the full, final, typeset and author-corrected version of record of the manuscript is available on our site with no access controls, subscription charges or pay-per-view fees (<http://bmjopen.bmj.com>).

If you have any questions on BMJ Open's open peer review process please email [info.bmjopen@bmj.com](mailto:info.bmjopen@bmj.com)

# BMJ Open

## Gender-specific prevalence and associated factors of hypertension among elderly Bangladeshi people: findings from a nationally representative survey

|                               |                                                                                                                                                                                                                                                                                                                                                                                                                                                                                                                                                                                                                                                                                                                                                                                                                                                                                                                                                                                                                                                                                                                                                                                                                                                                                                                                                                                                                 |
|-------------------------------|-----------------------------------------------------------------------------------------------------------------------------------------------------------------------------------------------------------------------------------------------------------------------------------------------------------------------------------------------------------------------------------------------------------------------------------------------------------------------------------------------------------------------------------------------------------------------------------------------------------------------------------------------------------------------------------------------------------------------------------------------------------------------------------------------------------------------------------------------------------------------------------------------------------------------------------------------------------------------------------------------------------------------------------------------------------------------------------------------------------------------------------------------------------------------------------------------------------------------------------------------------------------------------------------------------------------------------------------------------------------------------------------------------------------|
| Journal:                      | <i>BMJ Open</i>                                                                                                                                                                                                                                                                                                                                                                                                                                                                                                                                                                                                                                                                                                                                                                                                                                                                                                                                                                                                                                                                                                                                                                                                                                                                                                                                                                                                 |
| Manuscript ID                 | bmjopen-2020-038326                                                                                                                                                                                                                                                                                                                                                                                                                                                                                                                                                                                                                                                                                                                                                                                                                                                                                                                                                                                                                                                                                                                                                                                                                                                                                                                                                                                             |
| Article Type:                 | Original research                                                                                                                                                                                                                                                                                                                                                                                                                                                                                                                                                                                                                                                                                                                                                                                                                                                                                                                                                                                                                                                                                                                                                                                                                                                                                                                                                                                               |
| Date Submitted by the Author: | 06-Mar-2020                                                                                                                                                                                                                                                                                                                                                                                                                                                                                                                                                                                                                                                                                                                                                                                                                                                                                                                                                                                                                                                                                                                                                                                                                                                                                                                                                                                                     |
| Complete List of Authors:     | <p>Hanif, Abu Abdullah Mohammad; BRAC James P Grant School of Public Health, BRAC University, Centre for Non-communicable Diseases and Nutrition</p> <p>Shamim, Abu Ahmed; BRAC James P Grant School of Public Health, BRAC University, Centre for Non-communicable Diseases and Nutrition</p> <p>Hossain, Md Mokbul; BRAC James P Grant School of Public Health, BRAC University, Centre for Non-communicable Diseases and Nutrition</p> <p>Hasan, Mehedi; BRAC James P Grant School of Public Health, BRAC University, Centre for Non-communicable Diseases and Nutrition</p> <p>Khan, Md Showkat Ali; BRAC James P Grant School of Public Health, BRAC University, Centre for Non-communicable Diseases and Nutrition</p> <p>Hossaine, Moyazzam; BRAC James P Grant School of Public Health, BRAC University, Centre for Non-communicable Diseases and Nutrition</p> <p>Ullah, Mohammad Aman ; National Nutrition Services (NNS), Institute of Public Health Nutrition (IPHN)</p> <p>Rahman, S M Mustafizur; National Nutrition Services (NNS), Institute of Public Health Nutrition (IPHN)</p> <p>Sarker, Samir Kanti ; National Nutrition Services (NNS), Institute of Public Health Nutrition (IPHN)</p> <p>Mitra, Dipak; North South University, Public Health</p> <p>Mridha, Malay; BRAC James P Grant School of Public Health, BRAC University, Centre for Non-communicable Diseases and Nutrition</p> |
| Keywords:                     | Hypertension < CARDIOLOGY, Cardiac Epidemiology < CARDIOLOGY, EPIDEMIOLOGY                                                                                                                                                                                                                                                                                                                                                                                                                                                                                                                                                                                                                                                                                                                                                                                                                                                                                                                                                                                                                                                                                                                                                                                                                                                                                                                                      |
|                               |                                                                                                                                                                                                                                                                                                                                                                                                                                                                                                                                                                                                                                                                                                                                                                                                                                                                                                                                                                                                                                                                                                                                                                                                                                                                                                                                                                                                                 |

SCHOLARONE™  
Manuscripts

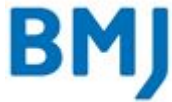

I, the Submitting Author has the right to grant and does grant on behalf of all authors of the Work (as defined in the below author licence), an exclusive licence and/or a non-exclusive licence for contributions from authors who are: i) UK Crown employees; ii) where BMJ has agreed a CC-BY licence shall apply, and/or iii) in accordance with the terms applicable for US Federal Government officers or employees acting as part of their official duties; on a worldwide, perpetual, irrevocable, royalty-free basis to BMJ Publishing Group Ltd ("BMJ") its licensees and where the relevant Journal is co-owned by BMJ to the co-owners of the Journal, to publish the Work in this journal and any other BMJ products and to exploit all rights, as set out in our [licence](#).

The Submitting Author accepts and understands that any supply made under these terms is made by BMJ to the Submitting Author unless you are acting as an employee on behalf of your employer or a postgraduate student of an affiliated institution which is paying any applicable article publishing charge ("APC") for Open Access articles. Where the Submitting Author wishes to make the Work available on an Open Access basis (and intends to pay the relevant APC), the terms of reuse of such Open Access shall be governed by a Creative Commons licence – details of these licences and which [Creative Commons](#) licence will apply to this Work are set out in our licence referred to above.

Other than as permitted in any relevant BMJ Author's Self Archiving Policies, I confirm this Work has not been accepted for publication elsewhere, is not being considered for publication elsewhere and does not duplicate material already published. I confirm all authors consent to publication of this Work and authorise the granting of this licence.

1  
2  
3 **Gender-specific prevalence and associated factors of hypertension among elderly Bangladeshi**  
4 **people: findings from a nationally representative survey**  
5  
6  
7  
8

9 Abu Abdullah Mohammad Hanif<sup>1</sup>, Abu Ahmed Shamim<sup>1</sup>, Md. Mokbul Hossain<sup>1</sup>, Mehedi Hasan<sup>1</sup>, Md  
10 Showkat Ali Khan<sup>1</sup>, Moyazzam Hossaine<sup>1</sup>, Mohammad Aman Ullah<sup>2</sup>, Samir Kanti Sarker<sup>2</sup>, S M  
11 Mustafizur Rahman<sup>2</sup>, Dipak Kumar Mitra<sup>3</sup>, Malay Kanti Mridha<sup>1</sup>  
12  
13  
14  
15  
16  
17

18 <sup>1</sup>Centre for Non-communicable Diseases and Nutrition, BRAC James P Grant School of Public  
19 Health, BRAC University, Dhaka, Bangladesh

20 <sup>2</sup>National Nutrition Services (NNS), Institute of Public Health Nutrition (IPHN), Bangladesh

21 <sup>3</sup>North-South University, Bangladesh  
22  
23  
24  
25

26 Correspondence to:

27 Malay Kanti Mridha; [malay.mridha@bracu.ac.bd](mailto:malay.mridha@bracu.ac.bd)  
28  
29  
30

## 31 Abstract

32  
33 **Objective:** We aimed to estimate the gender-specific prevalence and associated factors of hypertension  
34 among elderly people in Bangladesh using data from a nationally representative survey.  
35  
36  
37

38 **Design and method:** We analyzed data from the food security and nutrition surveillance round 2018-  
39 19. The multistage cluster sampling method was used to select the study population. Hypertension was  
40 defined as systolic blood pressure  $\geq 140$  mmHg and/or diastolic blood pressure  $\geq 90$  mmHg and/or  
41 having a history of hypertension. We carried out the descriptive analysis, bivariate and multivariable  
42 logistic regression to report the weighted prevalence of hypertension as well as crude and adjusted odds  
43 ratios with 95% confidence interval. A p-value  $< 0.05$  was considered statistically significant.  
44  
45  
46  
47  
48

49 **Setting:** The study was conducted in 82 clusters (57 rural, 15 non-slum urban, and 10 slums) in all 8  
50 administrative divisions of Bangladesh.  
51  
52  
53

54 **Participants:** A total of 2,482 males and 2,335 females aged  $\geq 60$  years were included in the analysis.  
55  
56

57 **Results:** The weighted prevalence of hypertension was 42% and 56% among males and females,  
58 respectively. The prevalence was higher among females across all sociodemographic, behavioral, and  
59  
60

1  
2  
3 biological strata. Factors associated with higher odds of hypertension in both sexes were age 70+ years  
4 [AOR with 95%CI: 1.32 (1.09,1.60) for males and 1.40 (1.15,1.71) for females]; insufficient physical  
5 activity [AOR with 95%CI: 1.50 (1.25,1.81) and 1.38 (1.15,1.67)]; central obesity [AOR with 95%CI: 2.76  
6 (2.22,3.43) and 2.20 (1.82,2.67)]; and self-reported diabetes [AOR with 95%CI: 1.36 (1.02,1.82) and  
7 1.82 (1.35,2.45)]. Additionally, more than 10 years of education increased odds of hypertension [AOR  
8 with 95%CI: 1.83 (1.38,2.44)] among males.  
9  
10  
11  
12

13  
14  
15 **Conclusion:** In Bangladesh, both elderly males and females have a high prevalence of hypertension,  
16 with disproportionately greater prevalence among females. The Ministry of Health of Bangladesh  
17 should consider this while designing and implementing health programs for elderly people.  
18  
19  
20

21 **Keywords:** Hypertension, elderly people, prevalence, Bangladesh  
22  
23  
24  
25

### 26 **Strengths and limitations of this study**

- 27 • Information on the prevalence, sex-difference, and associated factors of hypertension among  
28 the elderly Bangladeshi population are scarce.
- 29 • The nationally representative design allowed the objective assessment of the prevalence, sex-  
30 difference, and factors of hypertension among the elderly Bangladeshi population.
- 31 • Blood pressure was measured on a single day rather than longitudinal measurements to  
32 confirm the diagnosis of hypertension.
- 33 • The associations might not be causal due to lack of temporality, as the study was a cross-  
34 sectional one.
- 35 • Some strong confounders such as salt consumption, genetic factors could not be addressed.  
36  
37  
38  
39  
40  
41  
42  
43  
44  
45

## 46 **Introduction**

47  
48  
49 The proportion of the aging population around the world is rapidly increasing, and the pace is faster  
50 than ever. The global population aged  $\geq 60$  years reached 962 million in 2017, more than double  
51 compared to 1980 and is projected to double again by 2050 when it reaches 2.1 billion <sup>1</sup>. In another  
52 estimate, globally, the population aged  $\geq 60$  years will be 22% by the year 2050, and 80% of which will  
53 live in low and middle-income countries <sup>2</sup>. In 2017, 8.8% of the South Asian population was aged  $\geq 60$   
54 years, which is projected to be 18.9% by 2050 <sup>1</sup>. Despite its arbitrary nature, persons aged  $\geq 65$  years  
55 are considered as elderly in most of the developed countries <sup>3</sup>. However, in Bangladesh, persons aged  
56  
57  
58  
59  
60

1  
2  
3  $\geq 60$  years are considered as elderly people considering the shorter longevity<sup>4</sup>. Bangladesh witnessed a  
4 five-fold increase in the elderly population between 1974 and 2001<sup>5</sup>. According to the Bangladesh  
5 Bureau of Statistics, about 12.5 million (7.5%) of Bangladeshi people were elderly in 2019, which is  
6 expected to be 40 million (20%) by the year 2050<sup>6</sup>.  
7  
8  
9

10  
11 Hypertension or raised blood pressure is a condition when the pressure of blood flow on the vessel walls  
12 become higher than normal<sup>7</sup>. People often are not aware of whether they are hypertensive or not, and  
13 hence it is often called the “silent killer”<sup>8</sup>. Globally, hypertension is one of the major causes of deaths  
14 and disabilities. According to the World Health Organization Global Health Observatory (GHO) 2016  
15 data, 7.5 million annual deaths were estimated to be caused by high blood pressure, which was about  
16 12.8% of total deaths worldwide. Hypertension is also accounted for 57 million disability-adjusted life  
17 years (DALYs), which amounts to 3.7% of total DALYs<sup>9</sup>. Globally, hypertension is responsible for  
18 45% of deaths from cardiac causes, and 51% of the deaths from stroke<sup>10</sup>. As a risk factor, hypertension  
19 causes nearly 30% of all cardiovascular disease<sup>11</sup>.  
20  
21  
22  
23  
24  
25

26  
27 The prevalence of hypertension substantially increases with age. Evidence from the Framingham heart  
28 study, the longest-standing study on cardiovascular disease epidemiology, showed that more than 90%  
29 of the people who remain normotensive at the age of 65 years would develop hypertension at their  
30 remaining life-span, may be due to age-related vascular changes<sup>12</sup>. Bangladesh Demographic and  
31 Health Survey 2011 (BDHS 2011) reported that 30% of the males and 52% of the females aged  $\geq 65$   
32 years were hypertensive, along with 25% of both sexes of the same age group were prehypertensive<sup>13</sup>.  
33 Another study reported that the prevalence of hypertension among Bangladeshi adults and elderly ( $\geq 60$   
34 years) population was 25% and 40%, respectively<sup>14</sup>. The same study reported that an estimated 23% of  
35 the elderly people in rural Bangladesh had undiagnosed hypertension, and among those who were  
36 diagnosed and were receiving treatment, 68% had uncontrolled hypertension.  
37  
38  
39  
40  
41  
42  
43

44 Despite these facts, hypertension among elderly people in this region could not gain enough attention.  
45 One of the reasons can be limited information due to poor or no screening and control measures for  
46 hypertension among the elderly population. To the best of our knowledge, there is no study reporting  
47 national prevalence and associated risk factors of hypertension among the elderly Bangladeshi  
48 population of 60 years and above. Even some studies have excluded older adults who are at higher risk  
49 of NCDs. Accordingly, the objective of our study is to report the prevalence and factors associated with  
50 hypertension among elderly males and females of Bangladesh.  
51  
52  
53  
54  
55  
56  
57  
58  
59  
60

## Materials and Methods

### Study design and site

We conducted a cross-sectional survey among six population groups (children <5 years, adolescent boys, adolescent girls, adult females, adult males, and elderly people). Our objective was to generate nationally and divisionally representative estimates of different nutrition and health-related variables, including major noncommunicable diseases in elderly males and females. The data collection period was from October 2018 through October 2019. In this nationally representative study, we enrolled participants from all eight administrative divisions (Barisal, Chattogram, Dhaka, Khulna, Mymensingh, Rajshahi, Rangpur, and Sylhet) and covered rural, non-slum urban and slum areas. We enrolled in study subjects from 82 randomly selected clusters (57 rural, 15 non-slums urban, and 10 slums).

### Sample size and sampling techniques

We determined the sample size to generate nationally, and divisionally representative prevalence for the selected indicators with prevalence ranged from 4% to 98% using a multistage cluster sampling. We considered the type I error,  $\alpha = 0.05$ ; allowable margin of error,  $d = 0.05$  (or  $d = \text{prevalence}/2$  if  $\text{prevalence} \leq 0.1$ ); design effect,  $DEF = 1.61$  and calculated a sample size of 62 elderly individuals from each cluster. Accordingly, the sample size for the elderly population was 5,580 from 90 clusters in the country. Finally, we could complete collecting data from 82 clusters and obtained a sample size of 4,894 elderly people.

Separate sampling designs were applied to select the study sites in rural, urban, and slum areas. For the rural area, two districts were first selected from each division in the first stage of four-stage sampling. From each district, two sub-districts (upazilla) were randomly selected. In the third stage, two unions were randomly chosen from each of the selected sub-districts. The villages/mouzas/geographically demarcated segments with 250-400 households were then identified and mapped. Finally, we randomly selected two of the listed village/mouza/segments from each union as study clusters.

In the urban areas, we used the population proportion of Bangladesh Bureau of Statistics (BBS) 2011 census<sup>15</sup>. We randomly selected 16 wards (1-2 wards/division). We then identified the Mahalla (similar to the villages) with more than 250 households, and the mahallas with >500 households were further sub-divided into smaller geographically demarcated segments of ~250 households. We randomly picked one segment from the listed segments from the selected wards, and that was our study cluster.

In the slum areas, the Census of Slum Areas and Floating Population 2014 was used for the selection of study sites<sup>16</sup>. Slums having  $\geq 300$  households were identified, and those with >500 households were

1  
2  
3 further divided into smaller segments. Two segments from the Dhaka and Chattogram divisions and  
4 one from each of the other six divisions were randomly selected as study clusters.  
5  
6  
7

8 For each cluster, data collectors first listed all households with individuals aged  $\geq 60$  years. A statistician  
9 then selected 80 households from the list using Simple Random Sampling to enroll 62 elderly people  
10 from a cluster. If any household had more than one person aged  $\geq 60$  years, we randomly selected one.  
11  
12  
13  
14  
15  
16

17 Figure 1: Study flow chart of participants selection (aged  $\geq 60$  years)  
18  
19

## 20 Data Collection 21

22  
23 We collected data using a structured questionnaire, developed initially in English, and then translated  
24 into the local language. Data were collected using face to face interviews and physical measurements  
25 and were directly entered in tablet computers (Samsung Galaxy Tab A7) using a customized  
26 SurveyCTO application<sup>17</sup>. At the end of everyday data collection, data collectors uploaded all the  
27 collected data to the server. We measured the height (using locally made portable stadiometer), weight  
28 (using TANITA UM-070 weighing scale), waist circumference (using measuring tape), and blood  
29 pressure (using Omron HEM 7120) of the elderly people.  
30  
31  
32  
33  
34  
35

36 Anthropometric measurements were taken based on WHO guidelines, as specified in the Food and  
37 Nutrition Technical Assistance (FANTA) anthropometry manual<sup>18</sup>. The weight was measured to the  
38 nearest 0.1 kg with light cloths, and height was measured to the nearest 0.1 cm in the standing position  
39 with no shoes. Waist circumference was measured to the nearest 0.1 cm at the end of a normal  
40 expiration, at the midpoint between the lower part of the last rib and the top of the hipbone, with the  
41 arms relaxed at the sides. Usually, we took two measurements of weight, height, and waist  
42 circumference, and if the gap between the two first measurements were  $>0.1$  kg for weight and  $>0.5$  cm  
43 for height and waist circumference, we took the third measurement. Before measuring blood pressure,  
44 the data collector ensured that the participant was in a resting condition for at least 15 minutes. There  
45 was a three minutes interval between two subsequent measurements. If there was a gap of  $\geq 10$  mmHg  
46 between the first two measurements of systolic and/or diastolic blood pressure, a third measurement  
47 was taken.  
48  
49  
50  
51  
52  
53  
54  
55

## 56 Operational definitions 57

58  
59 The outcome variable in our analysis was the hypertension status of elderly males and females.  
60



1  
2  
3 Hypertension was defined as systolic blood pressure  $\geq 140$  mmHg, or diastolic blood pressure  $\geq 90$   
4 mmHg or if the participants were told as hypertensive by any trained health care provider (self-  
5 reported)<sup>19</sup>. The variable was made dichotomous either as hypertensive (measured or self-reported)  
6 or as non-hypertensive to facilitate logistic regression.  
7  
8  
9

10  
11 We made a list of potential factors associated with hypertension among elderly people based on  
12 literature review and types of data collected by the survey. The socioeconomic factors were age (60-  
13 69 years vs. 70+ years), place of residence (rural, non-slum urban, and slum), education (no formal  
14 education, up to primary level, up to 10 completed years and >10 completed years), wealth status,  
15 marital status (currently married vs. never married, divorced, widowed or separated), and religion  
16 (Muslim vs. others).  
17  
18  
19

20  
21  
22 The behavioral factors were physical activity, fruits and vegetable consumption ( $\geq 5$  servings/day vs.  
23 <5 servings), current smoking status (no vs. yes), and smokeless tobacco consumption status (no vs.  
24 yes). An elderly person was considered doing adequate physical active (during work, transport, and  
25 recreational activities), if he or she reported at least 150 minutes of moderate-intensity physical activity  
26 per week or 75 minutes of heavy physical activity per week or equivalent<sup>20</sup>.  
27  
28  
29

30  
31 Body mass index, waist circumference, and self-reported diabetes were the anthropometric and clinical  
32 factors. We used the Asian cutoff to categorize Body Mass Index (BMI) into underweight ( $< 18.5$   
33 kg/m<sup>2</sup>), normal ( $\geq 18.5$  to  $< 23.0$  kg/m<sup>2</sup>), overweight ( $\geq 23.0$  to  $< 27.5$  kg/m<sup>2</sup>, and obese ( $\geq 27.5$  kg/m<sup>2</sup>)  
34  
35  
36  
37  
38  
39  
40  
41  
42  
43  
44  
45  
46  
47  
48  
49  
50  
51  
52  
53  
54  
55  
56  
57  
58  
59  
60

## Quality Assurance and Control

Data collectors and field supervisors received extensive training on interviews, anthropometric  
measurements, and maintenance of data collection instruments and had gone through a rigorous  
standardization procedure. We field-tested the questionnaire, modified it and refreshed the data  
collectors based on the findings of field testing. To ensure data quality, the field supervisors directly  
observed 5% of the interviews and re-interviewed another 5% of the randomly selected participants  
within 48 hours of the initial visit. Interim analyses were performed to check the data quality. All the  
measuring tools were calibrated routinely.

## Statistical Analysis

We performed all the data analysis using Stata 15.1 (Stata Corp, College Station, TX, USA) <sup>23</sup>. All the background characteristics are reported as categorical variables. We performed principal component analysis (PCA) to calculate wealth quintiles of the households of the participants. We estimated the weighted prevalence of hypertension for both elderly males and females. As the males and females differed by the distribution of risk factors and the prevalence of hypertension, we conducted separate bivariate and multivariable logistic regression, respectively, to identify the factors associated with hypertension. The variables with a p-value of  $\leq 0.2$  in the crude analysis were included in the multivariable logistic regression model <sup>a24</sup>. Variance inflation factors (VIFs) were also checked to assess multi-collinearity among variables. We included both BMI and waist circumference separately in our initial analysis as both are important predictors of hypertension. But finally, we used the waist circumference in the regression model due to its high correlation with BMI ( $r = 0.87$ ) as well as its program implications as waist circumference can be easily measured and interpreted for screening in a low resource setting. Crude and adjusted odds ratios were estimated at 95% confidence intervals, and the determinants with the p-value  $< 0.05$  were considered statistically significant.

## Ethical considerations

The FSNSP 2018-19 obtained the ethical approval from the Institutional Review Board (IRB) of the BRAC James P Grant School of Public Health, BRAC University, Dhaka, Bangladesh (IRB Reference number: 2018-020-IR). Written informed consent was taken from the respondents before data collection and measurements.

## Patient and public involvement

No patients or public were directly involved in conceptualization, design, data collection, or dissemination of this study. However, the data collection supervisors explained the study procedure and purpose to the local leaders to receive community consent.

## Results

Table 1 describes the characteristics of the study participants. Of the participants, 2,482 (51.5%) were male and 2,335 (48.5%) were female. The median and the interquartile range of age of the males and females were 65.7 (62.6-71.4) years and 66.0 (62.3-72.9) years. About 72% of the participants were from the rural area, whereas 17% from non-slum urban and 11% from the slums. About 63% of the participants had no formal education, and this proportion is higher among females (77.1%) than their

1  
2  
3 male counterparts (48.9%). About 14.8% of elderly males and only 1.8% of elderly females completed  
4 education above the secondary level. Among the participants, about 92% of males and 25% of females  
5 were currently married. More than 42% of males and 45% of females reported insufficient physical  
6 activity. As per the data, daily fruits and vegetable consumption of 9 out of 10 elderlies were <5  
7 servings. About 37% of males and 3% of females reported themselves as current smokers, whereas  
8 about 41% of elderly males and 58% of elderly females reported themselves as a current user of  
9 smokeless tobacco. A higher proportion (34.4%) of females were overweight or obese than the males  
10 (28.0%), whereas the prevalence of underweight was the same. Central obesity was identified among  
11 23% of males and 41% of females. About 11% of elderly males and 13% of elderly females reported  
12 having diabetes.  
13  
14  
15  
16  
17  
18  
19  
20

21 **Table 1: Background characteristics of the study population by sex**  
22  
23  
24  
25

26 **Figure 2** demonstrates the distribution of a few selected behavioral and clinical characteristics across  
27 the places of residence and sexes. In our study, the prevalence of these risk factors is higher among  
28 elderly females compared to their male counterparts except for insufficient physical activity in urban  
29 areas. Almost 80% of males and 78% of females of the non-slum urban area reported performing an  
30 insufficient physical activity, which is around 40% in both rural and slum areas. Overall, 91% of the  
31 elderly were consuming inadequate fruits and vegetables, which was 94% in females and 87% in males.  
32 However, above 98% of slum women failed to consume the recommended servings of fruits and  
33 vegetables. Overweight/obesity was also highest in urban females, which was about 38% compared to  
34 22% in urban males. Similarly, 60% of urban females were identified with central obesity.  
35  
36  
37  
38  
39  
40  
41  
42  
43  
44  
45

46 Figure 2: Selected behavioral and clinical characteristics by area of residence and gender  
47  
48

49 Table 2 shows the prevalence of hypertension according to the characteristics of the participants. The  
50 overall prevalence of hypertension was 49%, which was 42% in males and 56% in females. Urban  
51 elderly females had the highest prevalence of hypertension (63%), whereas the male slum dwellers  
52 had the lowest prevalence (30%). With respect to wealth quintiles, the wealthiest of the population had  
53 the highest prevalence of hypertension in both sexes (51% in males and 62% in females). The  
54 prevalence of hypertension increased with age, education, body mass index, and waist circumference  
55 in both sexes. Married elderly males had a lower prevalence of hypertension (41% vs. 58%). Moreover,  
56  
57  
58  
59  
60

1  
2  
3 the prevalence of hypertension was lower among those who reported sufficient physical activity, and  
4 adequate consumption of fruits and vegetables. Unexpectedly, the prevalence of hypertension was  
5 found lower among current smokers (35% vs. 52%). However, the prevalence of hypertension did not  
6 differ much between current users and non-users of smokeless tobacco in this survey.  
7  
8  
9

10  
11 **Table 2: Prevalence of hypertension according to background characteristics among elderly**  
12 **males and females (weighted) with 95% Confidence Interval**  
13

14  
15  
16  
17 We reported the results of bivariate and multivariable logistic regressions in Table 3. In bivariate  
18 analysis, we found that all the selected variables were significantly associated with hypertension in  
19 males, whereas in females, we found that age, place of residence, education, wealth index, marital  
20 status, physical activity, smokeless tobacco use, BMI, waist circumference and diabetes were  
21 significantly associated with hypertension. However, in multivariate analysis, we found that age,  
22 physical activity, waist circumference, and self-reported diabetes were significantly associated with  
23 hypertension for both males and females, whereas the place of residence, education, and smoking were  
24 associated with hypertension only in case of the elderly males.  
25  
26  
27  
28  
29

30  
31 Table 3: Factors associated with hypertension among elderly Bangladeshi people stratified by sex  
32  
33

34  
35 For elderly males, age, education, and waist circumference demonstrated an association with  
36 hypertension. Elderly males had higher odds of hypertension for being aged  $\geq 70$  years (AOR: 1.32;  
37 95% CI: 1.09, 1.60; p-value: 0.005); having education up to SSC (AOR: 1.25; 95% CI: 1.00, 1.56; p-  
38 value: 0.049); having education above SSC (AOR: 1.83; 95% CI: 1.38, 2.44; p-value  $< 0.001$ ); having  
39 waist circumference  $\geq 90$ cm (AOR: 2.76; 95% CI: 2.22, 3.43; P-value:  $< 0.001$ ). On the other hand,  
40 living in the slums (AOR: 0.71; 95% CI: 0.52, 0.96; p-value: 0.025); and being current smoker (AOR:  
41 0.74; 95% CI: 0.61, 0.89; p-value: 0.002) were found as negatively associated with having  
42 hypertension among elderly males. Insufficient physical activity (AOR: 1.50; 95% CI: 1.25, 1.81; p-  
43 value  $< 0.001$ ) and self-reported diabetes (AOR: 1.36; 95% CI: 1.02, 1.82; p-value: 0.037) were found  
44 as two risk factors of hypertension among elderly males when adjusted with other covariates. However,  
45 wealth index, marital status, religion, consumption of fruits and vegetables were not found associated  
46 with having hypertension among males while adjusted with the confounders.  
47  
48  
49  
50  
51  
52  
53

54  
55 For elderly females, age and waist circumference demonstrated an association. Elderly females had  
56 higher odds of having hypertension for being aged  $\geq 70$  years (AOR: 1.40; 95% CI: 1.15, 1.71; p-value:  
57 0.001); and waist circumference  $\geq 80$ cm (AOR: 2.20; 95% CI: 1.82, 2.67; P-value:  $< 0.001$ ).  
58  
59  
60

1  
2  
3 Insufficient physical activity (AOR: 1.38; 95% CI: 1.15, 1.67; p-value: 0.001) and self-reported  
4 diabetes (AOR: 1.82; 95% CI: 1.35, 2.45; p-value <0.001) were also identified as the risk factors of  
5 hypertension among elderly females when adjusted with other covariates. However, no other variables,  
6 including education, wealth index, and consumption of fruits and vegetables, were found associated  
7 with having hypertension among females in multivariable logistic regression.  
8  
9  
10  
11  
12

## 13 Discussion

14  
15  
16

17 In our study, the overall prevalence of hypertension among the elderly people of Bangladesh was 49%,  
18 which is similar to the south Asian prevalence of hypertension among elderly aged  $\geq 65$  years (53%)  
19 but lower than the average prevalence in the low and middle-income countries (66%) reported in a  
20 recent systematic review and meta-analysis<sup>25</sup>. Our reported prevalence is higher than the prevalence  
21 estimated in Bangladesh demographic and health survey 2011, which was 35% and 40% for the age  
22 groups 60-69 and 70+ years, respectively<sup>26</sup>. The increase in the prevalence of hypertension may be  
23 due to recent advancements in the economy and infrastructure of the country, along with rapid  
24 urbanization, sedentary lifestyles, and stress<sup>27-29</sup>. Hypertension is considered the most important  
25 modifiable risk factor of cardiovascular diseases worldwide<sup>30</sup>. It has been shown that hypertension is  
26 responsible for nearly 30% of all cardiovascular diseases, and a person with hypertension has nearly  
27 three times the likelihood of having cardiovascular incidents compared to non-hypertensive  
28 individuals<sup>11</sup>. As a major contributor to cardiovascular diseases, hypertension causes a major  
29 proportion of ischemic heart diseases, heart failure, renal failure, as well as cerebrovascular diseases  
30 such as stroke<sup>31</sup>. As almost half of the population in the elderly age group in Bangladesh is  
31 hypertensive, we can indisputably assert that Bangladesh must take immediate steps to address this  
32 problem. Policymakers need to pay special attention while designing the screening and intervention  
33 program considering the health and wellbeing of the elderly people.  
34  
35  
36  
37  
38  
39  
40  
41  
42  
43  
44

45 After segregating by sex, the prevalence of hypertension was 42% and 56% for males, and females,  
46 respectively. This higher prevalence among females is supported by several studies in Bangladesh and  
47 elsewhere<sup>32</sup>. It may be due to a lack of ovarian hormones during the postmenopausal period. Studies  
48 suggested that ovarian hormones, especially estrogen, may have the potentials to keep the blood  
49 pressure lower in premenopausal women, and lack of it may be responsible for elevated blood pressure  
50 in postmenopausal women<sup>33</sup>. Moreover, our findings indicate that women, at their advanced age,  
51 become socially more vulnerable to hypertension. For example, three out of four elderly women did  
52 not have a spouse, and it may affect their health care seeking and treatment. The government should  
53 pay additional attention to design customized screening and awareness programs for elderly people  
54 with special attention to the vulnerability of women.  
55  
56  
57  
58  
59  
60

1  
2  
3  
4  
5 Our study corroborated the fact that the risk of developing hypertension increases with age in both  
6 sexes. Studies conducted in Bangladesh <sup>13</sup>, India <sup>34</sup>, Pakistan <sup>35</sup>, Nepal <sup>36</sup>, Indonesia <sup>37</sup>, and China <sup>38</sup>,  
7 have shown that the older age group had a higher prevalence of hypertension. The biological effect of  
8 the increased arterial resistance due to age-related changes in the arterial wall, i.e., thickening of the  
9 arterial wall in old ages, may contribute to high-risk of hypertension in older ages <sup>39</sup>. Bangladesh is in  
10 the midst of a huge demographic transition, and with the decreasing trend of birth and death rate, the  
11 proportion of the elderly population is growing which will eventually add more hypertensive patients  
12 and create more pressure on the already over-burdened health system of the country. In this study,  
13 insufficient physical activity was found significantly associated with hypertension in both sexes.  
14 Elderlies, who reported less than 150 minutes of moderate-intensity or equivalent physical activity per  
15 week, had around 1.5 times more odds of having hypertension. This finding is supported by numerous  
16 studies <sup>13 36 40</sup>. Besides, physical inactivity was also found associated directly with stroke and ischemic  
17 heart diseases <sup>41</sup>. Elderly males and females with higher waist circumference had three times and two  
18 times more odds of having hypertension, respectively. Several studies have reported that waist  
19 circumference, as it represents central obesity, is a better predictor of hypertension compared to BMI  
20 <sup>42 43</sup>.

21  
22  
23  
24  
25  
26  
27  
28  
29  
30  
31 In this study, smoking and smokeless tobacco use were inversely associated with hypertension for both  
32 males and females. These findings are contrary to the existing evidence that smoking causes adverse  
33 cardiovascular events and increases the risk of coronary heart diseases in a combined role with  
34 hypertension and dyslipidemia <sup>44</sup>. This finding may be due to the reverse causation because the  
35 participants might have given up the habit of smoking due to their age and known hypertension status,  
36 and we collected the data only on current smoking status. At least one study suggested that to see the  
37 proper effects of smoking on hypertension; smoking data should be collected in a life-course approach  
38 as the effects of smoking may not appear immediately after starting or quitting smoking <sup>45</sup>. In our  
39 analysis, fruits and vegetable consumption also was not found significantly associated with  
40 hypertension in both sexes. In the case of hypertension, fruit and vegetable consumption usually helps  
41 with increased potassium intake. But in Bangladesh, improper processing, such as washing after  
42 cutting or over-cooking, may reduce the amount of potassium <sup>46 47</sup>. Also, not all fruits and vegetables  
43 have a high level of potassium. However, this should be studied further to explore causal pathway  
44 between hypertension and smoking, tobacco, fruits, and vegetables.  
45  
46  
47  
48  
49  
50  
51  
52  
53

54  
55 Among other factors, education was positively associated with hypertension. Elderly males with more  
56 than ten years of education had almost two times higher odds of having hypertension compared to  
57 those without any formal education. Education levels may elevate wealth status, which makes the  
58 people used to a sedentary lifestyle, and eventually may increase the risk of hypertension <sup>48</sup>. However,  
59  
60



1  
2  
3 the wealth index didn't show any such clear pattern, although elderlies in the upper wealth quintiles  
4 had a relatively higher prevalence of hypertension. In this study, living in slums was associated with  
5 lower odds of hypertension. Self-reported diabetes was also found positively associated with  
6 hypertension in both males and females in this age group of the population, which is supported by  
7 several studies in Bangladesh and elsewhere <sup>49-51</sup>.  
8  
9  
10

## 11 12 **Strengths and limitations** 13

14  
15 Prevalence of hypertension among elderly people was reported in several studies in Bangladesh, but  
16 to the best of our knowledge, this is the first-ever nationally representative survey in Bangladesh  
17 investigating the prevalence and associated factors of hypertension among the elderly people. The  
18 limitations of the study include sampling challenges at the field level. The data collectors faced higher  
19 refusal rates in wealthier non-slum urban areas and a few isolated rural communities. Besides, seven  
20 selected rural clusters were dropped from the survey due to administrative and financial constraints,  
21 which may affect the national representativeness in the study. Among other limitations, blood pressure  
22 measurements were taken on a single day rather than longitudinal measurements on different days to  
23 confirm the diagnosis of hypertension. Also, the associations we have found in our study might not be  
24 causal due to lack of temporality, as the study was a cross-sectional one. Besides, we could not adjust  
25 for some strong confounders, such as salt consumption, genetic factors <sup>52,53</sup>. However, these limitations  
26 emphasize the importance of further research on the determinants of hypertension among the elderly  
27 people of Bangladesh. We also recommend studying the sex difference in the physiology and  
28 pathophysiology of hypertension by exploring the effects of gonadal hormones and sex chromosomes  
29 on blood pressure to yield customized management of hypertension separately for both males and  
30 females.  
31  
32  
33  
34  
35  
36  
37  
38  
39  
40

## 41 **Conclusions** 42

43  
44 As per the findings of our study, about half of the Bangladeshi elderlies were hypertensive, and  
45 hypertension was more prevalent among elderly females. Common factors associated with  
46 hypertension for both sexes were age, insufficient physical activity, central obesity, and self-reported  
47 diabetes. Education was also positively associated with hypertension in males. Risk factors such as  
48 insufficient physical activity and obesity are largely modifiable by appropriate education and control  
49 programs with support from the health and other sectors of the government. The early diagnosis of  
50 hypertension and other health problems is critical for controlling hypertension and the prevention of  
51 hypertension-related complications. However, the sex difference in the prevalence of and factors  
52 associated with hypertension indicated that a common prevention and control strategy might not work  
53 in this age group of population. Rather, the government should design a specific screening and control  
54 program to reduce the number of cases by early diagnosis and control and eventually minimize further  
55  
56  
57  
58  
59  
60

1  
2  
3 complications of hypertension. Besides, education programs should immediately be initiated to raise  
4 awareness among the elderly males and females as well as their family members on healthy lifestyles.  
5 The introduction of geriatric health care with the general health care system at the primary health care  
6 level can be an important step in improving the overall health of elderly people.  
7  
8  
9

## 10 11 12 13 14 15 16 17 18 19 20 21 22 23 24 25 26 27 28 29 30 31 32 33 34 35 36 37 38 39 40 41 42 43 44 45 46 47 48 49 50 51 52 53 54 55 56 57 58 59 60

### References

1. United Nations DoEaSA, Population Division. World population ageing, 2017 highlights (ST/ESA/SER.A/397)2017.
2. World Health Organization. Ageing and health 2018, February 5 [Available from: <https://www.who.int/news-room/fact-sheets/detail/ageing-and-health> accessed February 9, 2020.
3. World Health Organization. WHO | Proposed working definition of an older person in Africa for the MDS Project. *WHO* 2002
4. Rahman KMM. Unnayan Onneshan Policy Brief on Present Social Context and Elderly Population in Bangladesh.13.
5. Barikdar A, Ahmed T, Lasker SP. The Situation of the Elderly in Bangladesh. *Bangladesh J Bioethics* 2016;7(1):27-36. doi: 10.3329/bioethics.v7i1.29303
6. Jahangir AR. Bangladesh faces a challenge to ensure welfare of its aging population | Inter Press Service. 2019.
7. World Health Organization. Hypertension 2020 [Available from: <https://www.who.int/health-topics/hypertension/> accessed February 9, 2020.
8. World Health Organization. Q&As on hypertension [updated 2015, September. Available from: <https://www.who.int/features/qa/82/en/> accessed February 9, 2020.
9. World Health Organization. Raised blood pressure: Situation and trends 2020 [Available from: [https://www.who.int/gho/ncd/risk\\_factors/blood\\_pressure\\_prevalence\\_text/en/](https://www.who.int/gho/ncd/risk_factors/blood_pressure_prevalence_text/en/) accessed February 10 2020.
10. World Health Organization. Global health risks: mortality and burden of disease attributable to selected major risks. Geneva, Switzerland, 2009:62.
11. Khanam F, Hossain MB, Mistry SK, et al. Prevalence and Risk Factors of Cardiovascular Diseases among Bangladeshi Adults: Findings from a Cross-sectional Study. *J Epidemiol Glob Health* 2019;9(3):176-84. doi: 10.2991/jegh.k.190531.001 [published Online First: 2019/09/19]
12. Mosley WJ, Lloyd-Jones DM. Epidemiology of Hypertension in the Elderly. *Clinics in Geriatric Medicine* 2009;25(2):179-89 %U <https://linkinghub.elsevier.com/retrieve/pii/S0749069009000032>.
13. Al Kibria GM, Burrowes V, Choudhury A, et al. Sex differences in prevalence and associated factors of prehypertension and hypertension among Bangladeshi adults. *International Journal of Cardiology Hypertension* 2019;1:100006 %U <http://www.sciencedirect.com/science/article/pii/S2590086219300060>.
14. Khanam MA, Lindeboom W, Razzaque A, et al. Prevalence and determinants of pre-hypertension and hypertension among the adults in rural Bangladesh: findings from a community-based study. *BMC public health* 2015;15(1):203 %U <http://bmcpublihealth.biomedcentral.com/articles/10.1186/s12889-015-1520-0>.
15. Bangladesh Bureau of Statistics (BBS). Population & Housing Census: Preliminary Results, 2011.
16. Bangladesh Bureau of Statistics (BBS). Census of Slum Areas and Floating Population 2014 2015.
17. Dobility Inc. %U <https://www.surveycto.com> [program].
18. Cogill B. Anthropometric Indicators Measurement Guide, 2003.



19. Rocella J. THE SEVENTH REPORT OF THE JOINT NATIONAL COMMITTEE ON PREVENTION, DETECTION, EVALUATION, AND TREATMENT OF HIGH BLOOD PRESSURE. THE JNC 7 REPORT. 2003:3.
20. World Health O. Global recommendations on physical activity for health. %@ 978-92-4-159997-9 %U <http://www.ncbi.nlm.nih.gov/books/NBK3050572010>.
21. W. H. O. Expert Consultation. Appropriate body-mass index for Asian populations and its implications for policy and intervention strategies. *Lancet* 2004;363(9403):157-63. doi: 10.1016/S0140-6736(03)15268-3 [published Online First: 2004/01/17]
22. Misra A, Vikram NK, Gupta R, et al. Waist circumference cutoff points and action levels for Asian Indians for identification of abdominal obesity. *Int J Obes (Lond)* 2006;30(1):106-11. doi: 10.1038/sj.ijo.0803111 [published Online First: 2005/09/29]
23. StataCorp. Stata Statistical Software: Release 15. *College Station, TX: StataCorp LLC* 2017
24. Maldonado G, Greenland S. Simulation study of confounder-selection strategies. *American journal of epidemiology* 1993;138(11):923-36 @ 1476-6256.
25. Sarki AM, Nduka CU, Stranges S, et al. Prevalence of Hypertension in Low- and Middle-Income Countries: A Systematic Review and Meta-Analysis. *Medicine* 2015;94(50):e1959 %U [https://journals.lww.com/md-journal/FullText/2015/12150/Prevalence\\_of\\_Hypertension\\_in\\_Low\\_and.5.aspx](https://journals.lww.com/md-journal/FullText/2015/12150/Prevalence_of_Hypertension_in_Low_and.5.aspx).
26. Rahman MM, Gilmour S, Akter S, et al. Prevalence and control of hypertension in Bangladesh: a multilevel analysis of a nationwide population-based survey. *Journal of hypertension* 2015;33(3):465-72; discussion 72. doi: 10.1097/HJH.0000000000000421 [published Online First: 2014/11/08]
27. Atkinson K, Lowe S, Moore S. Human development, occupational structure and physical inactivity among 47 low and middle income countries. *Preventive Medicine Reports* 2016;3:40-45. doi: 10.1016/j.pmedr.2015.11.009
28. Martin SL, Kirkner GJ, Mayo K, et al. Urban, rural, and regional variations in physical activity. *The Journal of Rural Health: Official Journal of the American Rural Health Association and the National Rural Health Care Association* 2005;21(3):239-44. doi: 10.1111/j.1748-0361.2005.tb00089.x
29. Bishwajit G, Ide S, Hossain MA, et al. Trade Liberalization, Urbanization and Nutrition Transition in Asian Countries. *Journal of Nutritional Health & Food Science* 2014;2(1) doi: 10.15226/jnhfs.2014.00109
30. Collaborators GBDRF. Global, regional, and national comparative risk assessment of 84 behavioural, environmental and occupational, and metabolic risks or clusters of risks for 195 countries and territories, 1990-2017: a systematic analysis for the Global Burden of Disease Study 2017. *Lancet* 2018;392(10159):1923-94. doi: 10.1016/S0140-6736(18)32225-6 [published Online First: 2018/11/30]
31. Lionakis N, Mendrinou D, Sanidas E, et al. Hypertension in the elderly. *World Journal of Cardiology* 2012;4(5):135-47 %U <https://www.ncbi.nlm.nih.gov/pmc/articles/PMC3364500/>.
32. Rahman M, Zaman MM, Islam JY, et al. Prevalence, treatment patterns, and risk factors of hypertension and pre-hypertension among Bangladeshi adults. *Journal of human hypertension* 2018;32(5):334-48. doi: 10.1038/s41371-017-0018-x [published Online First: 2017/12/13]
33. Dubey RK, Oparil S, Imthurn B, et al. Sex hormones and hypertension. *Cardiovascular Research* 2002;53(3):688-708. doi: 10.1016/s0008-6363(01)00527-2
34. Bhise MD, Patra S. Prevalence and correlates of hypertension in Maharashtra, India: A multilevel analysis. *PloS one* 2018;13(2):e0191948. doi: 10.1371/journal.pone.0191948 [published Online First: 2018/02/06]
35. Basit A, Tanveer S, Fawwad A, et al. Prevalence and contributing risk factors for hypertension in urban and rural areas of Pakistan; a study from second National Diabetes

- 1  
2  
3 Survey of Pakistan (NDSP) 2016-2017. *Clin Exp Hypertens* 2020;42(3):218-24. doi:  
4 10.1080/10641963.2019.1619753 [published Online First: 2019/06/04]  
5  
6 36. Hasan M, Sutradhar I, Akter T, et al. Prevalence and determinants of hypertension among  
7 adult population in Nepal: Data from Nepal Demographic and Health Survey 2016. *PLoS one*  
8 2018;13(5):e0198028 %U  
9 <https://journals.plos.org/plosone/article?id=10.1371/journal.pone.28>.  
10  
11 37. Peltzer K, Pengpid S. The Prevalence and Social Determinants of Hypertension among Adults  
12 in Indonesia: A Cross-Sectional Population-Based National Survey. *International Journal of*  
13 *Hypertension*, 2018.  
14 38. Song H, Feng D, Wang R, et al. The urban-rural disparity in the prevalence and risk factors of  
15 hypertension among the elderly in China-a cross-sectional study. *PeerJ* 2019;7:e8015. doi:  
16 10.7717/peerj.8015 [published Online First: 2019/12/19]  
17 39. Shukuri A, Tewelde T, Shaweno T. Prevalence of old age hypertension and associated factors  
18 among older adults in rural Ethiopia. [https://www.dovepress.com/prevalence-of-old-age-](https://www.dovepress.com/prevalence-of-old-age-hypertension-and-associated-factors-among-older-peer-reviewed-fulltext-article-IBPC)  
19 [hypertension-and-associated-factors-among-older-peer-reviewed-fulltext-article-IBPC](https://www.dovepress.com/prevalence-of-old-age-hypertension-and-associated-factors-among-older-peer-reviewed-fulltext-article-IBPC).  
20 *Integrated Blood Pressure Control*, 2019.  
21 40. Hypertension Study G. Prevalence, awareness, treatment and control of hypertension  
22 among the elderly in Bangladesh and India: a multicentre study. *Bulletin of the World Health*  
23 *Organization* 2001;79(6):490-500.  
24 41. Lawes CM, Vander Hoorn S, Rodgers A, et al. Global burden of blood-pressure-related  
25 disease, 2001. *Lancet* 2008;371(9623):1513-8. doi: 10.1016/S0140-6736(08)60655-8  
26 [published Online First: 2008/05/06]  
27 42. Hirani V, Zaninotto P, Primatesta P. Generalised and abdominal obesity and risk of diabetes,  
28 hypertension and hypertension-diabetes co-morbidity in England. *Public Health Nutr*  
29 2008;11(5):521-7. doi: 10.1017/S1368980007000845 [published Online First: 2007/09/05]  
30 43. Yalcin BM, Sahin EM, Yalcin E. Which anthropometric measurements is most closely related  
31 to elevated blood pressure? *Family Practice* 2005;22(5):541-47. doi: 10.1093/fampra/cmi043  
32 44. Primatesta P, Falaschetti E, Gupta S, et al. Association between smoking and blood pressure:  
33 evidence from the health survey for England. *Hypertension* 2001;37(2):187-93.  
34 45. Gao K, Shi X, Wang W. The life-course impact of smoking on hypertension, myocardial  
35 infarction and respiratory diseases. *Scientific Reports* 2017;7 %U  
36 <https://www.ncbi.nlm.nih.gov/pmc/articles/PMC5489535/>  
37 46. Martínez-Pineda M, Yagüe-Ruiz C, Caverni-Muñoz A, et al. Reduction of potassium content  
38 of green bean pods and chard by culinary processing. *Tools for chronic kidney disease.*  
39 *Nefrología (English Edition)* 2016;36(4):427-32. doi: 10.1016/j.nefro.2016.03.009  
40 47. Noubiap JJN, Bigna JJR, Nansseu JRN. Low Sodium and High Potassium Intake for  
41 Cardiovascular Prevention: Evidence Revisited With Emphasis on Challenges in Sub-Saharan  
42 Africa. *The Journal of Clinical Hypertension* 2015;17(1):81-83. doi: 10.1111/jch.12439  
43 48. Yabiku ST, Schlabach S. Social Change and the Relationships Between Education and  
44 Employment. *Population Research and Policy Review* 2009;28(4):533-49. doi:  
45 10.1007/s11113-008-9117-2  
46 49. Chowdhury MA, Uddin MJ, Haque MR, et al. Hypertension among adults in Bangladesh:  
47 evidence from a national cross-sectional survey. *BMC cardiovascular disorders* 2016;16:22.  
48 doi: 10.1186/s12872-016-0197-3  
49 50. Craig LS, Gage AJ, Thomas AM. Prevalence and predictors of hypertension in Namibia: A  
50 national-level cross-sectional study. *PLoS one* 2018;13(9):e0204344. doi:  
51 10.1371/journal.pone.0204344  
52 51. Da-Mata FAF, Galvao TF, Pereira MG, et al. Prevalence of Self-Reported Diabetes and Its  
53 Associated Factors: A Population-Based Study in Brazil. *Int J Endocrinol* 2015;2015 doi:  
54 10.1155/2015/610790  
55  
56  
57  
58  
59  
60

- 1  
2  
3 52. Everett B, Zajacova A. Gender Differences in Hypertension and Hypertension Awareness  
4 Among Young Adults. *Biodemography and social biology* 2015;61(1):1-17 %U  
5 <https://www.ncbi.nlm.nih.gov/pmc/articles/PMC4896734/>.  
6  
7 53. Ha SK. Dietary salt intake and hypertension. *Electrolyte Blood Press* 2014;12(1):7-18. doi:  
8 10.5049/EBP.2014.12.1.7 [published Online First: 2014/07/26]  
9  
10  
11  
12

13 **Contributors** AAMH conceptualized and conducted the data analysis and drafted the initial  
14 manuscript. AAS, MH, MMH, MSAK, MHe, MAU, SKS, SMMR, DKM were involved in the  
15 conceptualization and design of the study as well as reviewed and approved the final version of the  
16 manuscript. MKM led the conceptualization/design of the survey and supervision of data collection,  
17 critically reviewed the manuscript, and approved the final version of the manuscript.  
18  
19  
20

21 **Acknowledgment** We are thankful to all the study participants, data collectors, field supervisors, and  
22 managers of the national nutrition surveillance round 2018-19.  
23  
24  
25

26 **Funding** The study was funded by the National Nutrition Services (NNS), Institute of Public Health  
27 Nutrition, Ministry of Health and Family Welfare, Government of Bangladesh (Memo:  
28 45.165.032.01.00.003.2016-325; Date: 1011212017)  
29  
30  
31

32 **Disclaimer** The study sponsors had no role in the design and conduct of the study; in the collection,  
33 management, analysis and interpretation of data; and in the preparation, review or approval of the  
34 manuscript.  
35  
36  
37

38 **Competing interests** None declared.  
39  
40

41 **Patient consent for publication** Not applicable.  
42  
43  
44

45 **Ethics approval** The study obtained ethical approval from the Institutional Review Board (IRB) of  
46 the BRAC James P Grant School of Public Health, BRAC University, Dhaka, Bangladesh  
47  
48  
49

50 **Provenance and peer review** Not commissioned, externally peer-reviewed  
51  
52  
53

54 **Data availability statement** Data may be available upon reasonable request. All such requests can be  
55 sent to Mr. Kuhel Faizul Islam, IRB Coordinator, BRAC James P Grant School of Public Health,  
56 BRAC University, Dhaka, Bangladesh to the email address: kuhel@bracu.ac.bd  
57  
58  
59  
60

**Table 1: Background characteristics of the study population by sex**

| Variables                       | Overall |      | Male    |      | Female  |      | p-value |
|---------------------------------|---------|------|---------|------|---------|------|---------|
|                                 | N=4,817 |      | N=2,482 |      | N=2,335 |      |         |
|                                 | n       | %    | n       | %    | n       | %    |         |
| Age Group                       |         |      |         |      |         |      | <0.001  |
| 60 to 69 years                  | 3,225   | 67.0 | 1,725   | 69.5 | 1,500   | 64.3 |         |
| 70+ years                       | 1,591   | 33.0 | 757     | 30.5 | 834     | 35.7 |         |
| No                              | 4,238   | 88.0 | 2,212   | 89.1 | 2,026   | 86.8 |         |
| Yes                             | 579     | 12.0 | 270     | 10.9 | 309     | 13.2 |         |
| Place of Residence              |         |      |         |      |         |      | 0.003   |
| Rural                           | 3,463   | 71.9 | 1,835   | 73.9 | 1,628   | 69.7 |         |
| Non-slum urban                  | 807     | 16.8 | 394     | 15.9 | 413     | 17.7 |         |
| Slum                            | 547     | 11.4 | 253     | 10.2 | 294     | 12.6 |         |
| Educational status              |         |      |         |      |         |      | <0.001  |
| No education                    | 3,014   | 62.6 | 1,214   | 48.9 | 1,800   | 77.1 |         |
| Up to primary                   | 558     | 11.6 | 342     | 13.8 | 216     | 9.3  |         |
| Up to SSC                       | 843     | 17.5 | 567     | 22.8 | 276     | 11.8 |         |
| Above SSC                       | 402     | 8.3  | 359     | 14.5 | 43      | 1.8  |         |
| Wealth Quintile                 |         |      |         |      |         |      | 0.016   |
| Least wealthy (Q1)              | 966     | 20.1 | 543     | 21.9 | 423     | 18.1 |         |
| Lower (Q2)                      | 969     | 20.1 | 485     | 19.5 | 484     | 20.7 |         |
| Middle (Q3)                     | 963     | 20.0 | 494     | 19.9 | 469     | 20.1 |         |
| Upper (Q4)                      | 958     | 19.9 | 491     | 19.8 | 467     | 20.0 |         |
| Wealthiest (Q5)                 | 960     | 19.9 | 469     | 18.9 | 491     | 21.0 |         |
| Marital Status                  |         |      |         |      |         |      | <0.001  |
| Currently married               | 2,861   | 59.4 | 2,277   | 91.7 | 584     | 25.0 |         |
| Others*                         | 1,956   | 40.6 | 205     | 8.3  | 1,751   | 75.0 |         |
| Religion                        |         |      |         |      |         |      | 0.29    |
| Muslim                          | 4,075   | 84.6 | 2,113   | 85.1 | 1,962   | 84.0 |         |
| Others**                        | 742     | 15.4 | 369     | 14.9 | 373     | 16.0 |         |
| Physical Activity               |         |      |         |      |         |      | 0.026   |
| >=150 Minutes/week              | 2,707   | 56.2 | 1,433   | 57.7 | 1,274   | 54.6 |         |
| <150 Minutes/week               | 2,110   | 43.8 | 1,049   | 42.3 | 1,061   | 45.4 |         |
| Fruits & Vegetables Consumption |         |      |         |      |         |      | <0.001  |
| >=5 servings/day                | 450     | 9.3  | 320     | 12.9 | 130     | 5.6  |         |
| <5 servings/day                 | 4,367   | 90.7 | 2,162   | 87.1 | 2,205   | 94.4 |         |
| Currently smoking               |         |      |         |      |         |      | <0.001  |
| No                              | 3,828   | 79.5 | 1,564   | 63.0 | 2,264   | 97.0 |         |
| Yes                             | 989     | 20.5 | 918     | 37.0 | 71      | 3.0  |         |
| Smokeless tobacco use           |         |      |         |      |         |      | <0.001  |
| No                              | 2,438   | 50.6 | 1,455   | 58.6 | 983     | 42.1 |         |
| BMI Category (Asian)            |         |      |         |      |         |      | <0.001  |
| Normal                          | 2,077   | 45.1 | 1,145   | 47.5 | 932     | 42.4 |         |
| Underweight                     | 1,100   | 23.9 | 589     | 24.4 | 511     | 23.2 |         |
| Overweight                      | 1,084   | 23.5 | 554     | 23.0 | 530     | 24.1 |         |

|                                  |       |      |       |      |       |      |        |
|----------------------------------|-------|------|-------|------|-------|------|--------|
| Obese                            | 347   | 7.5  | 121   | 5.0  | 226   | 10.3 |        |
| Waist Circumference              |       |      |       |      |       |      | <0.001 |
| Male: <90 cm<br>Female: <80 cm   | 3,227 | 68.5 | 1,887 | 77.1 | 1,340 | 59.1 |        |
| Male: ≥ 90 cm<br>Female: ≥ 80 cm | 1,487 | 31.5 | 560   | 22.9 | 927   | 40.9 |        |
| Self-reported diabetes           |       |      |       |      |       |      | 0.012  |
| Yes                              | 2,379 | 49.4 | 1,027 | 41.4 | 1,352 | 57.9 |        |

\*Never married, widows, divorced and separated

\*\*Hindu, Christian, Buddhist and others

**Table 2: Prevalence of hypertension according to background characteristics among elderly males and females (weighted) with 95% Confidence Interval**

| Variables                       | Overall           | Male              | Female            |
|---------------------------------|-------------------|-------------------|-------------------|
|                                 | % (95% CI)        | % (95% CI)        | % (95% CI)        |
| Overall                         | 49.0 (45.2, 52.9) | 42.4 (37.4, 47.6) | 56.3 (52.1, 60.4) |
| Age Group (in Years)            |                   |                   |                   |
| 60 to 69 years                  | 47.6 (43.9, 51.4) | 40.7 (35.3, 46.3) | 55.2 (50.2, 60.0) |
| 70 years and above              | 51.5 (45.4, 57.6) | 45.5 (37.9, 53.3) | 58.4 (52.9, 63.7) |
| Place of Residence              |                   |                   |                   |
| Rural                           | 49.0 (45.0, 52.9) | 42.4 (37.3, 47.7) | 56.2 (51.9, 60.5) |
| Non-slum urban                  | 53.1 (48.4, 57.8) | 44.9 (38.5, 51.4) | 62.9 (57.7, 67.8) |
| Slum                            | 39.7 (32.4, 47.4) | 29.7 (24.0, 36.1) | 50.3 (40.9, 59.6) |
| Educational status              |                   |                   |                   |
| No education                    | 46.9 (42.6, 51.2) | 34.4 (29.2, 40.0) | 55.6 (51.0, 60.2) |
| Up to primary                   | 49.0 (40.3, 57.8) | 44.1 (31.8, 57.2) | 57.1 (47.4, 66.2) |
| Up to SSC                       | 50.6 (45.0, 56.1) | 47.4 (41.0, 53.8) | 58.8 (47.3, 69.5) |
| Above SSC                       | 66.8 (58.3, 74.3) | 65.7 (56.8, 73.6) | 81.2 (48.5, 95.2) |
| Wealth Quintile                 |                   |                   |                   |
| Least wealthy (Q1)              | 44.9 (38.8, 51.1) | 39.3 (31.9, 47.1) | 52.4 (43.5, 61.1) |
| Lower (Q2)                      | 48.4 (43.8, 53.0) | 39.0 (33.9, 44.3) | 57.5 (51.4, 63.3) |
| Middle (Q3)                     | 51.2 (45.3, 57.1) | 45.1 (38.1, 52.2) | 58.2 (50.4, 65.7) |
| Upper (Q4)                      | 46.4 (38.0, 55.1) | 41.2 (31.5, 51.8) | 52.2 (41.1, 63.1) |
| Wealthiest (Q5)                 | 56.5 (51.2, 61.7) | 51.3 (44.6, 57.8) | 61.7 (51.9, 70.6) |
| Marital Status                  |                   |                   |                   |
| Currently married               | 44.9 (40.7, 49.2) | 41.4 (36.3, 46.8) | 54.0 (48.2, 59.7) |
| Others**                        | 57.8 (53.6, 61.9) | 57.8 (48.6, 66.4) | 57.8 (53.2, 62.3) |
| Religion                        |                   |                   |                   |
| Muslim                          | 48.5 (44.0, 53.0) | 41.7 (36.0, 47.6) | 56.1 (51.3, 60.8) |
| Others***                       | 51.6 (47.4, 55.8) | 46.0 (39.0, 53.2) | 57.3 (52.5, 62.1) |
| Physical Activity               |                   |                   |                   |
| ≥150 Minutes/week               | 44.6 (40.9, 48.3) | 36.5 (31.3, 42.0) | 53.8 (49.6, 57.9) |
| <150 Minutes/week               | 56.2 (51.0, 61.2) | 52.3 (45.6, 59.0) | 60.1 (53.9, 66.1) |
| Fruits & Vegetables Consumption |                   |                   |                   |
| ≥5 servings/day                 | 44.7 (36.6, 53.0) | 37.0 (27.4, 47.7) | 62.6 (50.9, 73.0) |
| <5 servings/day                 | 49.5 (45.5, 53.4) | 43.2 (38.2, 48.3) | 55.9 (51.4, 60.3) |
| Current smokers                 |                   |                   |                   |
| No                              | 52.2 (48.2, 56.3) | 46.7 (41.1, 52.3) | 56.4 (52.1, 60.6) |

|                                  |                   |                   |                   |
|----------------------------------|-------------------|-------------------|-------------------|
| Yes                              | 34.8 (29.9, 40.1) | 33.9 (28.5, 39.7) | 52.2 (36.0, 68.0) |
| <b>Smokeless tobacco use</b>     |                   |                   |                   |
| No                               | 49.3 (44.7, 53.8) | 42.3 (36.9, 47.8) | 59.1 (52.3, 65.6) |
| Yes                              | 48.8 (44.5, 53.1) | 42.5 (36.1, 49.3) | 54.3 (49.7, 58.8) |
| <b>Body Mass Index</b>           |                   |                   |                   |
| Normal                           | 46.5 (42.2,50.8)  | 38.5 (33.5,43.9)  | 56.3 (50.7,61.8)  |
| Underweight                      | 32.9 (27.3,39.0)  | 30.0 (22.3,39.1)  | 36.6 (29.9,43.8)  |
| Overweight                       | 64.2 (58.9,69.1)  | 60.2 (54.4,65.7)  | 68.0 (59.5,75.4)  |
| Obese                            | 74.8 (64.3,83.0)  | 72.5 (57.7,83.6)  | 76.4 (62.6,86.3)  |
| <b>Waist Circumference</b>       |                   |                   |                   |
| Males <102 cm;<br>Females <88 cm | 41.7 (37.3,46.1)  | 36.6 (31.4,42.1)  | 48.9 (43.4,54.4)  |
| Males ≥102 cm;<br>Females ≥88 cm | 67.8 (63.7,71.6)  | 65.4 (58.4,71.8)  | 69.2 (63.0,74.7)  |
| <b>Self-reported diabetes</b>    |                   |                   |                   |
| No                               | 47.5 (43.8, 51.1) | 40.9 (36.0, 46.0) | 54.9 (51.1, 58.7) |
| Yes                              | 64.9 (55.2, 73.5) | 60.5 (49.6, 70.5) | 68.5 (56.2, 78.7) |

<sup>†</sup>Test was done between hypertension (Yes vs. No) and sex (Male vs. Female) for each row; CI: Confidence Interval

\*Statistically significant

\*\*Never married, widows, divorced and separated

\*\*\*Hindu, Christian, Buddhist and others

Table 3: Factors associated with hypertension among elderly Bangladeshi people stratified by sex

| Variables                 | Male    |            |         |            | Female  |             |        |            |
|---------------------------|---------|------------|---------|------------|---------|-------------|--------|------------|
|                           | COR     | 95% CI     | AOR     | 95% CI     | COR     | 95% CI      | AOR    | 95% CI     |
| <b>Age (in Years)</b>     |         |            |         |            |         |             |        |            |
| 60 to 69                  | Ref     |            | Ref     |            | Ref     |             | Ref    |            |
| 70+                       | 1.42*** | 1.19, 1.68 | 1.32**  | 1.09, 1.60 | 1.39*** | 1.17, 1.66  | 1.40** | 1.15, 1.71 |
| <b>Place of Residence</b> |         |            |         |            |         |             |        |            |
| Rural                     | Ref     |            | Ref     |            | Ref     |             | Ref    |            |
| Non-slum urban            | 1.72*** | 1.38, 2.15 | 0.93    | 0.69, 1.23 | 1.87*** | 1.48, 2.37) | 1.18   | 0.88, 1.59 |
| Slum                      | 0.76    | 0.58, 1.00 | 0.71*   | 0.52, 0.96 | 0.88    | 0.69, 1.13  | 0.89   | 0.67, 1.17 |
| <b>Educational status</b> |         |            |         |            |         |             |        |            |
| No education              | Ref     |            | Ref     |            | Ref     |             | Ref    |            |
| Up to primary             | 1.07    | 0.84, 1.37 | 0.92    | 0.71, 1.19 | 1.00    | 0.75, 1.33  | 0.95   | 0.70, 1.28 |
| Up to SSC                 | 1.62*** | 1.32, 1.98 | 1.25*   | 1.00, 1.56 | 1.71*** | 1.30, 2.25  | 1.27   | 0.94, 1.72 |
| Above SSC                 | 3.12*** | 2.44, 3.99 | 1.83*** | 1.38, 2.44 | 3.79**  | 1.68, 8.57  | 2.41   | 0.97, 6.00 |
| <b>Wealth Quintile</b>    |         |            |         |            |         |             |        |            |
| Least wealthy             | Ref     |            | Ref     |            | Ref     |             | Ref    |            |
| Lower                     | 0.95    | 0.74, 1.23 | 0.95    | 0.73, 1.24 | 1.28    | 0.98, 1.66  | 1.25   | 0.95, 1.64 |
| Middle                    | 1.37*   | 1.07, 1.75 | 1.19    | 0.91, 1.55 | 1.41*   | 1.08, 1.84  | 1.32   | 1.00, 1.75 |
| Upper                     | 1.23    | 0.96, 1.57 | 0.94    | 0.71, 1.23 | 1.19    | 0.91, 1.55  | 0.94   | 0.71, 1.26 |
| Wealthiest                | 1.75*** | 1.36, 2.25 | 0.94    | 0.69, 1.28 | 1.66*** | 1.27, 2.16  | 1.04   | 0.76, 1.44 |
| <b>Marital Status</b>     |         |            |         |            |         |             |        |            |
| Currently married         | Ref     |            | Ref     |            | Ref     |             | Ref    |            |
| Others**                  | 1.37*   | 1.03, 1.82 | 1.13    | 0.82, 1.56 | 1.23*   | 1.02, 1.49  | 1.03   | 0.84, 1.28 |
| <b>Religion</b>           |         |            |         |            |         |             |        |            |



|                                              |         |               |         |            |         |            |         |            |
|----------------------------------------------|---------|---------------|---------|------------|---------|------------|---------|------------|
| Muslim                                       | Ref     |               | Ref     |            | Ref     |            |         |            |
| Others***                                    | 1.28    | 1.03,<br>1.60 | 1.18    | 0.93, 1.51 | 0.99    | 0.79, 1.24 | NA      | NA         |
| <b>Physical Activity</b>                     |         |               |         |            |         |            |         |            |
| ≥150 minutes/week                            | Ref     |               | Ref     |            | Ref     |            | Ref     |            |
| <150 minutes/week                            | 1.95*** | 1.66,<br>2.29 | 1.50*** | 1.25, 1.81 | 1.72*** | 1.45, 2.03 | 1.38**  | 1.15, 1.67 |
| <b>Fruits &amp; Vegetables</b>               |         |               |         |            |         |            |         |            |
| ≥5 servings/day                              | Ref     |               | Ref     |            | Ref     |            |         |            |
| <5 servings/day                              | 1.35*   | 1.06,<br>1.72 | 1.24    | 0.95, 1.60 | 0.98    | 0.68, 1.40 | NA      | NA         |
| <b>Current smoker (for ≥30 days)</b>         |         |               |         |            |         |            |         |            |
| No                                           | Ref     |               | Ref     |            | Ref     |            | Ref     |            |
| Yes                                          | 0.55*** | 0.47,<br>0.65 | 0.74**  | 0.61, 0.89 | 0.65    | 0.41, 1.05 | 0.69    | 0.42, 1.15 |
| <b>Smokeless tobacco user (for ≥30 days)</b> |         |               |         |            |         |            |         |            |
| No                                           | Ref     |               | Ref     |            | Ref     |            | Ref     |            |
| Yes                                          | 0.80**  | 0.68,<br>0.94 | 0.86    | 0.72, 1.02 | 0.74**  | 0.63, 0.88 | 0.87    | 0.72, 1.04 |
| <b>Body Mass Index (BMI)</b>                 |         |               |         |            |         |            |         |            |
| Normal                                       | Ref     |               | Ref     |            | Ref     |            | Ref     |            |
| Underweight                                  | 0.62*** | 0.50,<br>0.77 | NA      | NA         | 0.56*** | 0.45, 0.69 | NA      | NA         |
| Overweight                                   | 2.25*** | 1.83,<br>2.77 | NA      | NA         | 1.69*** | 1.35, 2.12 | NA      | NA         |
| Obese                                        | 4.53*** | 2.96,<br>6.93 | NA      | NA         | 2.99*** | 2.10, 4.25 | NA      | NA         |
| <b>Waist Circumference</b>                   |         |               |         |            |         |            |         |            |
| Males <102 cm;<br>Females <88 cm             | Ref     |               | Ref     |            | Ref     |            | Ref     |            |
| Males ≥102 cm;<br>Females ≥88 cm             | 3.39*** | 2.78,<br>4.14 | 2.76*** | 2.22, 3.43 | 2.46*** | 2.06, 2.94 | 2.20*** | 1.82, 2.67 |
| <b>Self-reported Diabetes</b>                |         |               |         |            |         |            |         |            |
| No                                           | Ref     |               | Ref     |            | Ref     |            | Ref     |            |
| Yes                                          | 2.22*** | 1.72,<br>2.88 | 1.36*   | 1.02, 1.82 | 2.45*** | 1.85, 3.23 | 1.82*** | 1.35, 2.45 |

\* p < 0.05, \*\* p < 0.01, \*\*\* p < 0.001; CI: Confidence Interval; COR: Crude Odds Ratio; AOR: Adjusted Odds Ratio;  
 NA: Not applicable, these variables were not included in the adjusted analysis as these were dropped due to the significance level was >0.2 in the crude analysis or due to high correlation with a covariate.

Figure 1:

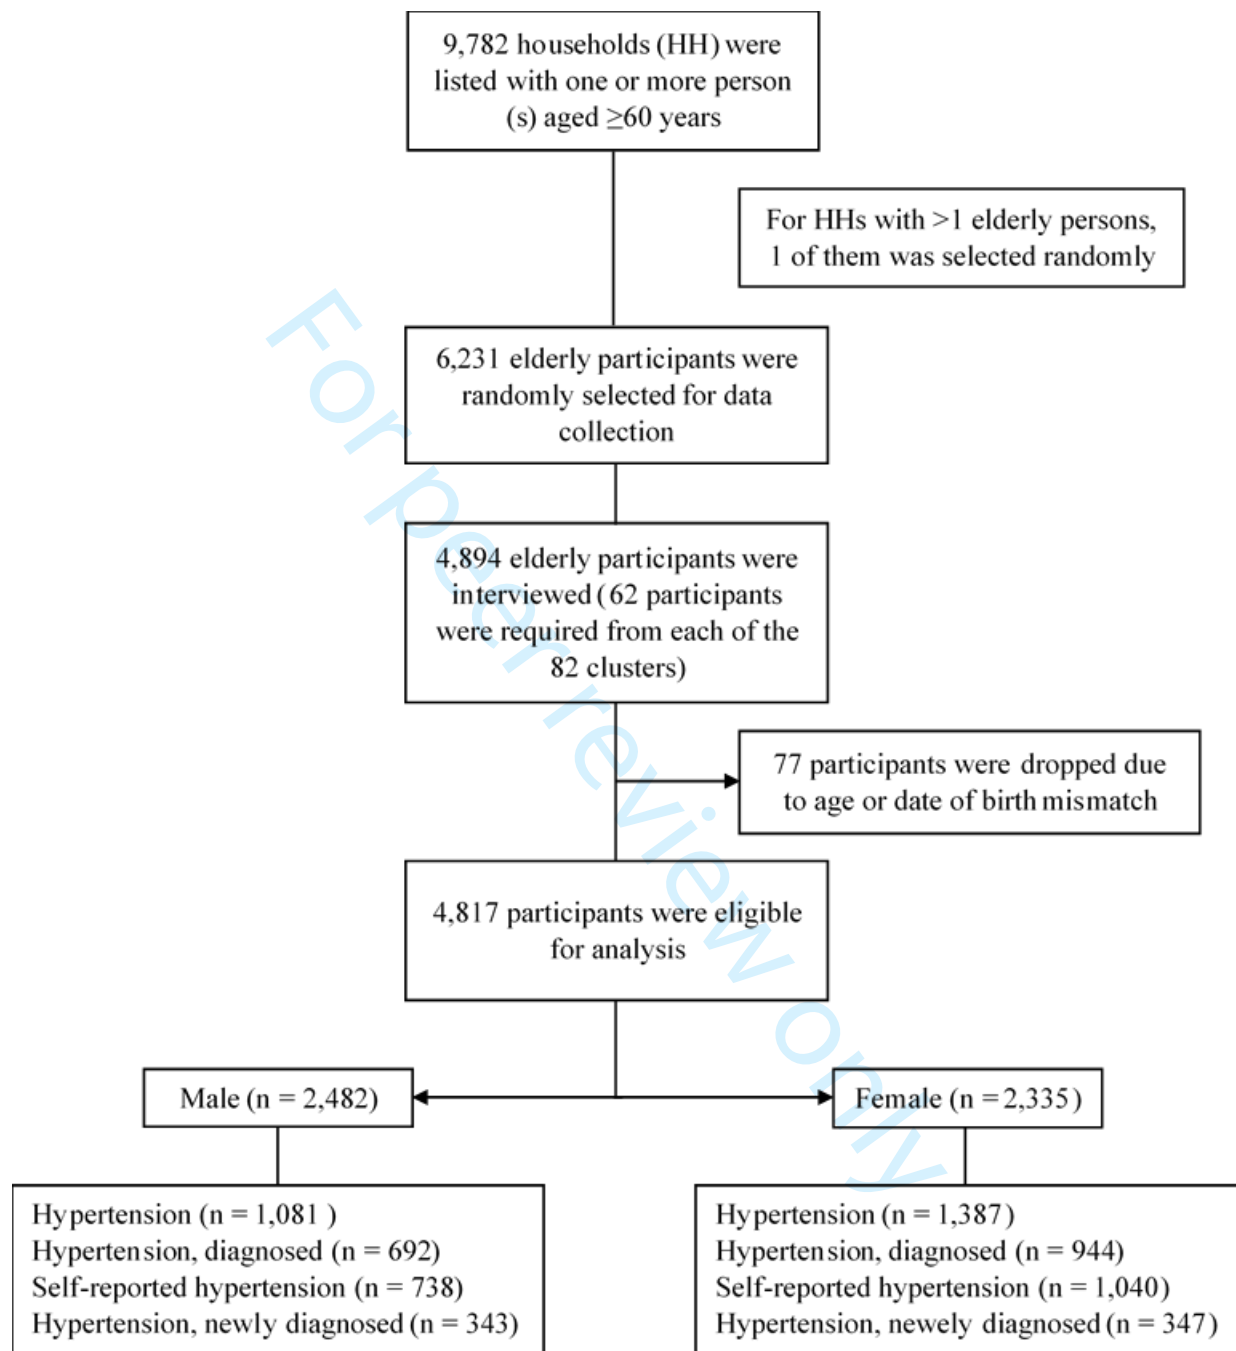Figure 1: Study flow chart of participants selection (aged  $\geq 60$  years)



Figure 2:

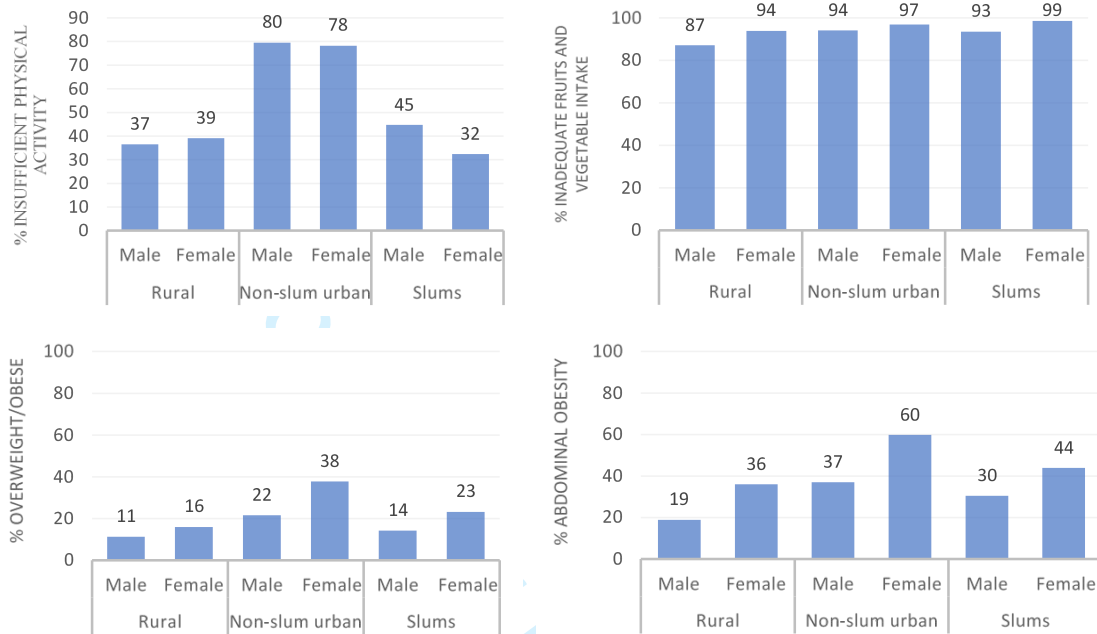

Figure 2: Selected behavioral and clinical characteristics by area of residence and gender

**STROBE 2007 (v4) Statement—Checklist of items that should be included in reports of *cross-sectional studies***

| Section/Topic                | Item # | Recommendation                                                                                                                                                                       | Reported on page # |
|------------------------------|--------|--------------------------------------------------------------------------------------------------------------------------------------------------------------------------------------|--------------------|
| <b>Title and abstract</b>    | 1      | (a) Indicate the study's design with a commonly used term in the title or the abstract                                                                                               | 1                  |
|                              |        | (b) Provide in the abstract an informative and balanced summary of what was done and what was found                                                                                  | 1-2                |
| <b>Introduction</b>          |        |                                                                                                                                                                                      |                    |
| Background/rationale         | 2      | Explain the scientific background and rationale for the investigation being reported                                                                                                 | 2-3                |
| Objectives                   | 3      | State specific objectives, including any prespecified hypotheses                                                                                                                     | 2-3                |
| <b>Methods</b>               |        |                                                                                                                                                                                      |                    |
| Study design                 | 4      | Present key elements of study design early in the paper                                                                                                                              | 4                  |
| Setting                      | 5      | Describe the setting, locations, and relevant dates, including periods of recruitment, exposure, follow-up, and data collection                                                      | 4                  |
| Participants                 | 6      | (a) Give the eligibility criteria, and the sources and methods of selection of participants                                                                                          | 4-5                |
| Variables                    | 7      | Clearly define all outcomes, exposures, predictors, potential confounders, and effect modifiers. Give diagnostic criteria, if applicable                                             | 5-6                |
| Data sources/<br>measurement | 8*     | For each variable of interest, give sources of data and details of methods of assessment (measurement). Describe comparability of assessment methods if there is more than one group | 5-6                |
| Bias                         | 9      | Describe any efforts to address potential sources of bias                                                                                                                            | 7                  |
| Study size                   | 10     | Explain how the study size was arrived at                                                                                                                                            | 5-6                |
| Quantitative variables       | 11     | Explain how quantitative variables were handled in the analyses. If applicable, describe which groupings were chosen and why                                                         | 7                  |
| Statistical methods          | 12     | (a) Describe all statistical methods, including those used to control for confounding                                                                                                | 7                  |
|                              |        | (b) Describe any methods used to examine subgroups and interactions                                                                                                                  | Not applicable     |
|                              |        | (c) Explain how missing data were addressed                                                                                                                                          | Not applicable     |
|                              |        | (d) If applicable, describe analytical methods taking account of sampling strategy                                                                                                   | 7                  |
|                              |        | (e) Describe any sensitivity analyses                                                                                                                                                | Not applicable     |
| <b>Results</b>               |        |                                                                                                                                                                                      |                    |

|                          |     |                                                                                                                                                                                                              |                |
|--------------------------|-----|--------------------------------------------------------------------------------------------------------------------------------------------------------------------------------------------------------------|----------------|
| Participants             | 13* | (a) Report numbers of individuals at each stage of study—eg numbers potentially eligible, examined for eligibility, confirmed eligible, included in the study, completing follow-up, and analysed            | 5              |
|                          |     | (b) Give reasons for non-participation at each stage                                                                                                                                                         | Not applicable |
|                          |     | (c) Consider use of a flow diagram                                                                                                                                                                           | 5              |
| Descriptive data         | 14* | (a) Give characteristics of study participants (eg demographic, clinical, social) and information on exposures and potential confounders                                                                     | 7-8            |
|                          |     | (b) Indicate number of participants with missing data for each variable of interest                                                                                                                          | Not applicable |
| Outcome data             | 15* | Report numbers of outcome events or summary measures                                                                                                                                                         | 7-8            |
| Main results             | 16  | (a) Give unadjusted estimates and, if applicable, confounder-adjusted estimates and their precision (eg, 95% confidence interval). Make clear which confounders were adjusted for and why they were included | 7-9            |
|                          |     | (b) Report category boundaries when continuous variables were categorized                                                                                                                                    | Not applicable |
|                          |     | (c) If relevant, consider translating estimates of relative risk into absolute risk for a meaningful time period                                                                                             | Not applicable |
| Other analyses           | 17  | Report other analyses done—eg analyses of subgroups and interactions, and sensitivity analyses                                                                                                               | Not applicable |
| <b>Discussion</b>        |     |                                                                                                                                                                                                              |                |
| Key results              | 18  | Summarise key results with reference to study objectives                                                                                                                                                     | 7-8            |
| Limitations              | 19  | Discuss limitations of the study, taking into account sources of potential bias or imprecision. Discuss both direction and magnitude of any potential bias                                                   | 12             |
| Interpretation           | 20  | Give a cautious overall interpretation of results considering objectives, limitations, multiplicity of analyses, results from similar studies, and other relevant evidence                                   | 12             |
| Generalisability         | 21  | Discuss the generalisability (external validity) of the study results                                                                                                                                        | 11-12          |
| <b>Other information</b> |     |                                                                                                                                                                                                              |                |
| Funding                  | 22  | Give the source of funding and the role of the funders for the present study and, if applicable, for the original study on which the present article is based                                                | 16             |

\*Give information separately for cases and controls in case-control studies and, if applicable, for exposed and unexposed groups in cohort and cross-sectional studies.

**Note:** An Explanation and Elaboration article discusses each checklist item and gives methodological background and published examples of transparent reporting. The STROBE checklist is best used in conjunction with this article (freely available on the Web sites of PLoS Medicine at <http://www.plosmedicine.org/>, Annals of Internal Medicine at <http://www.annals.org/>, and Epidemiology at <http://www.epidem.com/>). Information on the STROBE Initiative is available at [www.strobe-statement.org](http://www.strobe-statement.org).

# BMJ Open

## Gender-specific prevalence and associated factors of hypertension among elderly Bangladeshi people: findings from a nationally representative cross-sectional survey

|                                 |                                                                                                                                                                                                                                                                                                                                                                                                                                                                                                                                                                                                                                                                                                                                                                                                                                                                                                                                                                                                                                                                                                                                                                                                                                                                                                                                                                        |
|---------------------------------|------------------------------------------------------------------------------------------------------------------------------------------------------------------------------------------------------------------------------------------------------------------------------------------------------------------------------------------------------------------------------------------------------------------------------------------------------------------------------------------------------------------------------------------------------------------------------------------------------------------------------------------------------------------------------------------------------------------------------------------------------------------------------------------------------------------------------------------------------------------------------------------------------------------------------------------------------------------------------------------------------------------------------------------------------------------------------------------------------------------------------------------------------------------------------------------------------------------------------------------------------------------------------------------------------------------------------------------------------------------------|
| Journal:                        | <i>BMJ Open</i>                                                                                                                                                                                                                                                                                                                                                                                                                                                                                                                                                                                                                                                                                                                                                                                                                                                                                                                                                                                                                                                                                                                                                                                                                                                                                                                                                        |
| Manuscript ID                   | bmjopen-2020-038326.R1                                                                                                                                                                                                                                                                                                                                                                                                                                                                                                                                                                                                                                                                                                                                                                                                                                                                                                                                                                                                                                                                                                                                                                                                                                                                                                                                                 |
| Article Type:                   | Original research                                                                                                                                                                                                                                                                                                                                                                                                                                                                                                                                                                                                                                                                                                                                                                                                                                                                                                                                                                                                                                                                                                                                                                                                                                                                                                                                                      |
| Date Submitted by the Author:   | 24-Aug-2020                                                                                                                                                                                                                                                                                                                                                                                                                                                                                                                                                                                                                                                                                                                                                                                                                                                                                                                                                                                                                                                                                                                                                                                                                                                                                                                                                            |
| Complete List of Authors:       | Hanif, Abu Abdullah Mohammad; BRAC James P Grant School of Public Health, BRAC University, Centre for Non-communicable Diseases and Nutrition<br>Shamim, Abu Ahmed; BRAC James P Grant School of Public Health, BRAC University, Centre for Non-communicable Diseases and Nutrition<br>Hossain, Md Mokbul; BRAC James P Grant School of Public Health, BRAC University, Centre for Non-communicable Diseases and Nutrition<br>Hasan, Mehedi; BRAC James P Grant School of Public Health, BRAC University, Centre for Non-communicable Diseases and Nutrition<br>Khan, Md Showkat Ali; BRAC James P Grant School of Public Health, BRAC University, Centre for Non-communicable Diseases and Nutrition<br>Hossaine, Moyazzam; BRAC James P Grant School of Public Health, BRAC University, Centre for Non-communicable Diseases and Nutrition<br>Ullah, Mohammad Aman ; National Nutrition Services (NNS), Institute of Public Health Nutrition (IPHN)<br>Rahman, S M Mustafizur; National Nutrition Services (NNS), Institute of Public Health Nutrition (IPHN)<br>Sarker, Samir Kanti ; National Nutrition Services (NNS), Institute of Public Health Nutrition (IPHN)<br>Mitra, Dipak; North South University, Public Health<br>Mridha, Malay Kanti; BRAC James P Grant School of Public Health, BRAC University, Centre for Non-communicable Diseases and Nutrition |
| <b>Primary Subject Heading</b>: | Epidemiology                                                                                                                                                                                                                                                                                                                                                                                                                                                                                                                                                                                                                                                                                                                                                                                                                                                                                                                                                                                                                                                                                                                                                                                                                                                                                                                                                           |
| Secondary Subject Heading:      | Geriatric medicine, Global health, Public health                                                                                                                                                                                                                                                                                                                                                                                                                                                                                                                                                                                                                                                                                                                                                                                                                                                                                                                                                                                                                                                                                                                                                                                                                                                                                                                       |
| Keywords:                       | Hypertension < CARDIOLOGY, Cardiac Epidemiology < CARDIOLOGY, EPIDEMIOLOGY                                                                                                                                                                                                                                                                                                                                                                                                                                                                                                                                                                                                                                                                                                                                                                                                                                                                                                                                                                                                                                                                                                                                                                                                                                                                                             |
|                                 |                                                                                                                                                                                                                                                                                                                                                                                                                                                                                                                                                                                                                                                                                                                                                                                                                                                                                                                                                                                                                                                                                                                                                                                                                                                                                                                                                                        |

SCHOLARONE™  
Manuscripts



I, the Submitting Author has the right to grant and does grant on behalf of all authors of the Work (as defined in the below author licence), an exclusive licence and/or a non-exclusive licence for contributions from authors who are: i) UK Crown employees; ii) where BMJ has agreed a CC-BY licence shall apply, and/or iii) in accordance with the terms applicable for US Federal Government officers or employees acting as part of their official duties; on a worldwide, perpetual, irrevocable, royalty-free basis to BMJ Publishing Group Ltd ("BMJ") its licensees and where the relevant Journal is co-owned by BMJ to the co-owners of the Journal, to publish the Work in this journal and any other BMJ products and to exploit all rights, as set out in our [licence](#).

The Submitting Author accepts and understands that any supply made under these terms is made by BMJ to the Submitting Author unless you are acting as an employee on behalf of your employer or a postgraduate student of an affiliated institution which is paying any applicable article publishing charge ("APC") for Open Access articles. Where the Submitting Author wishes to make the Work available on an Open Access basis (and intends to pay the relevant APC), the terms of reuse of such Open Access shall be governed by a Creative Commons licence – details of these licences and which [Creative Commons](#) licence will apply to this Work are set out in our licence referred to above.

Other than as permitted in any relevant BMJ Author's Self Archiving Policies, I confirm this Work has not been accepted for publication elsewhere, is not being considered for publication elsewhere and does not duplicate material already published. I confirm all authors consent to publication of this Work and authorise the granting of this licence.

1  
2  
3 **Gender-specific prevalence and associated factors of hypertension among elderly Bangladeshi**  
4 **people: findings from a nationally representative cross-sectional survey**  
5  
6  
7

8  
9 Abu Abdullah Mohammad Hanif<sup>1</sup>, Abu Ahmed Shamim<sup>1</sup>, Md. Mokbul Hossain<sup>1</sup>, Mehedi Hasan<sup>1</sup>, Md  
10 Showkat Ali Khan<sup>1</sup>, Moyazzam Hossaine<sup>1</sup>, Mohammad Aman Ullah<sup>2</sup>, Samir Kanti Sarker<sup>2</sup>, S M  
11 Mustafizur Rahman<sup>2</sup>, Dipak Kumar Mitra<sup>3</sup>, Malay Kanti Mridha<sup>1</sup>  
12  
13  
14  
15

16  
17  
18 <sup>1</sup>Centre for Noncommunicable Diseases and Nutrition, BRAC James P Grant School of Public Health,  
19 BRAC University, Dhaka, Bangladesh

20  
21 <sup>2</sup>National Nutrition Services (NNS), Institute of Public Health Nutrition (IPHN), Bangladesh

22  
23 <sup>3</sup>North-South University, Bangladesh  
24  
25

26 Correspondence to:

27 Malay Kanti Mridha; [malay.mridha@bracu.ac.bd](mailto:malay.mridha@bracu.ac.bd)  
28  
29  
30

## 31 Abstract

32  
33  
34 **Objective:** We aimed to estimate the gender-specific prevalence and associated factors of hypertension  
35 among elderly people in Bangladesh.  
36

37  
38  
39 **Design and method:** We analyzed data from the food security and nutrition surveillance round 2018-  
40 19. The multistage cluster sampling method was used to select the study population. Hypertension was  
41 defined as systolic blood pressure  $\geq 140$  mmHg and/or diastolic blood pressure  $\geq 90$  mmHg and/or  
42 having a history of hypertension. We carried out the descriptive analysis, bivariate and multivariable  
43 logistic regression to report the weighted prevalence of hypertension as well as crude and adjusted odds  
44 ratios with 95% confidence interval. A p-value  $< 0.05$  was considered statistically significant.  
45  
46  
47

48  
49 **Setting:** The study was conducted in 82 clusters (57 rural, 15 non-slum urban, and 10 slums) in all 8  
50 administrative divisions of Bangladesh.  
51

52  
53  
54 **Participants:** A total of 2,482 males and 2,335 females aged  $\geq 60$  years were included in the analysis.  
55

56  
57  
58 **Results:** The weighted prevalence of hypertension was 42% and 56% among males and females,  
59 respectively. The prevalence was higher among females across all sociodemographic, behavioral, and  
60

1  
2  
3 biological strata. Factors associated with higher odds of hypertension in both sexes were age 70+ years  
4 [AOR with 95%CI: 1.37(1.13,1.66) for males and 1.40(1.15,1.70) for females]; education above 10<sup>th</sup>  
5 grade [AOR with 95%CI: 1.98(1.49,2.63) for males and 2.50(1.01,6.21) for females]; insufficient  
6 physical activity [AOR with 95%CI: 1.53(1.27,1.83) and 1.40(1.17,1.69)]; abdominal obesity [AOR  
7 with 95%CI: 2.81(2.26,3.49) and 2.21(1.82,2.67)]; and self-reported diabetes [AOR with 95%CI:  
8 1.40(1.05,1.87) and 1.83(1.36,2.46)]. Additionally, living in slums decreased odds of hypertension  
9 [AOR with 95%CI: 0.68(0.50,0.92)] among males.  
10  
11  
12  
13  
14  
15

16 **Conclusion:** In Bangladesh, half of the elderly were hypertensive, with a higher prevalence in females.  
17 Odds of hypertension was increased by older age ( $\geq 70$  years), education  $>10$  years, insufficient physical  
18 activity, abdominal obesity, and self-reported diabetes. The Ministry of Health of Bangladesh should  
19 consider this while designing and implementing health programs.  
20  
21  
22

23 **Keywords:** Hypertension, elderly people, prevalence, Bangladesh  
24  
25  
26  
27  
28  
29

### 30 **Strengths and limitations of this study**

- 31 • Information on the prevalence, sex-difference, and associated factors of hypertension among  
32 the elderly Bangladeshi population are scarce.
- 33 • The nationally representative design allowed the objective assessment of the prevalence, sex-  
34 difference, and factors of hypertension among the elderly Bangladeshi population.
- 35 • Blood pressure was measured on a single day rather than longitudinal measurements to  
36 confirm the diagnosis of hypertension.
- 37 • The associations might not be causal due to lack of temporality, as the study was a cross-  
38 sectional one.
- 39 • Some strong confounders such as salt consumption, tobacco consumption, genetic factors  
40 could not be addressed.  
41  
42  
43  
44  
45  
46  
47  
48  
49  
50  
51  
52  
53  
54  
55  
56  
57  
58  
59  
60

## Introduction

The proportion of the aging population around the world is rapidly increasing, and the pace is faster than ever. The global population aged  $\geq 60$  years reached 962 million in 2017, more than double compared to 1980 and is projected to double again by 2050 when it reaches 2.1 billion <sup>1</sup>. In another estimate, globally, the population aged  $\geq 60$  years will be 22% by the year 2050, and 80% of which will live in low and middle-income countries <sup>2</sup>. In 2017, 8.8% of the South Asian population was aged  $\geq 60$  years, which is projected to be 18.9% by 2050 <sup>1</sup>. Despite its arbitrary nature, persons aged  $\geq 65$  years are considered as elderly in most of the developed countries <sup>3</sup>. However, in Bangladesh, persons aged  $\geq 60$  years are considered as elderly people considering the shorter longevity <sup>4</sup>. Bangladesh witnessed a five-fold increase in the elderly population between 1974 and 2001 <sup>5</sup>. According to the Bangladesh Bureau of Statistics, about 12.5 million (7.5%) of Bangladeshi people were elderly in 2019, which is expected to be 40 million (20%) by the year 2050 <sup>6</sup>.

Hypertension or raised blood pressure is a condition when the pressure of blood flow on the vessel walls become higher than normal <sup>7</sup>. People often are not aware of whether they are hypertensive or not, and hence it is often called the “silent killer” <sup>8</sup>. Globally, hypertension is one of the major causes of deaths and disabilities. According to the World Health Organization Global Health Observatory (GHO) 2016 data, 7.5 million annual deaths were estimated to be caused by high blood pressure, which was about 12.8% of total deaths worldwide. Hypertension is also accounted for 57 million disability-adjusted life years (DALYs), which amounts to 3.7% of total DALYs <sup>9</sup>. Globally, hypertension is responsible for 45% of deaths from cardiac causes, and 51% of the deaths from stroke <sup>10</sup>. As a risk factor, hypertension causes nearly 30% of all cardiovascular disease <sup>11</sup>.

The prevalence of hypertension substantially increases with age. Evidence from the Framingham heart study, the longest-standing study on cardiovascular disease epidemiology, showed that more than 90% of the people who remain normotensive (systolic blood pressure  $< 120$  mmHg and diastolic blood pressure  $< 80$  mmHg) at the age of 65 years would develop hypertension (systolic blood pressure  $\geq 140$  mmHg and/or diastolic blood pressure  $\geq 90$  mmHg) at their remaining life-span, may be due to age-related vascular changes <sup>12</sup>. Kibria et al. analyzed data from the Bangladesh Demographic and Health Survey 2011 (BDHS 2011) and reported that 30% of the males and 52% of the females aged  $\geq 65$  years were hypertensive, along with 25% of both sexes of the same age group were prehypertensive (SBP 120-139 mmHg; DBP 80-89 mmHg)<sup>13</sup>. Another study reported that an estimated 23% of the elderly people in rural Bangladesh had undiagnosed hypertension (those who had no known hypertension but found hypertensive upon measurement), and among those who were diagnosed and were receiving treatment, 68% had uncontrolled hypertension (blood pressure above the normal range despite antihypertensive treatment) <sup>14</sup>.



1  
2  
3  
4  
5 Despite these facts, hypertension among elderly people in this region could not gain enough attention.  
6 One of the reasons can be limited information due to poor or no screening and control measures for  
7 hypertension among the elderly population. To the best of our knowledge, there is no study reporting  
8 national prevalence and associated risk factors of hypertension among the elderly Bangladeshi  
9 population of 60 years and above. Even some studies have excluded older adults who are at higher risk  
10 of NCDs. Accordingly, the objective of our study is to report the prevalence and factors associated with  
11 hypertension among elderly males and females of Bangladesh.  
12  
13  
14  
15  
16  
17

## 18 **Materials and Methods**

### 19 **Study design and site**

20  
21 We conducted a cross-sectional survey among six population groups (children <5 years, adolescent  
22 boys, adolescent girls, adult females, adult males, and elderly people). Our objective was to generate  
23 nationally and divisionally representative estimates of different nutrition and health-related variables,  
24 including major noncommunicable diseases in elderly males and females. The data collection period  
25 was from October 2018 through October 2019. In this nationally representative study, we enrolled  
26 participants from all eight administrative divisions (Barisal, Chattogram, Dhaka, Khulna, Mymensingh,  
27 Rajshahi, Rangpur, and Sylhet) and covered rural, non-slum urban and slum areas. We enrolled in study  
28 subjects from 82 randomly selected clusters (57 rural, 15 non-slums urban, and 10 slums).  
29  
30  
31  
32  
33  
34  
35

### 36 **Sample size and sampling techniques**

37  
38 We determined the sample size to generate nationally, and divisionally representative prevalence for  
39 the selected indicators with prevalence ranged from 4% to 98% using a multistage cluster sampling. We  
40 considered the type I error,  $\alpha = 0.05$ ; allowable margin of error,  $d = 0.05$  (or  $d = \text{prevalence}/2$  if  
41 prevalence  $\leq 0.1$ ); design effect, DEF = 1.61 and calculated a sample size of 62 elderly individuals from  
42 each cluster. Accordingly, the sample size for the elderly population was 5,580 from 90 clusters in the  
43 country. Finally, we could complete collecting data from 82 clusters and obtained a sample size of 4,894  
44 elderly people.  
45  
46  
47  
48  
49  
50

51 Separate sampling designs were applied to select the study sites in rural, urban, and slum areas. For the  
52 rural area, two districts were first selected from each division in the first stage of four-stage sampling.  
53 From each district, two sub-districts (Upazilla) were randomly selected. In the third stage, two unions  
54 were randomly chosen from each of the selected sub-districts. The villages/mouzas/geographically  
55 demarcated segments with 250-400 households were then identified and mapped. Finally, we randomly  
56 selected two of the listed village/mouza/segments from each union as study clusters.  
57  
58  
59  
60

1  
2  
3  
4  
5 In the urban areas, we used the population proportion of Bangladesh Bureau of Statistics (BBS) 2011  
6 census<sup>15</sup>. We randomly selected 16 wards (1-2 wards/division). We then identified the Mahalla (similar  
7 to the villages) with more than 250 households, and the mahallas with >500 households were further  
8 sub-divided into smaller geographically demarcated segments of ~250 households. We randomly  
9 picked one segment from the listed segments from the selected wards, and that was our study cluster.  
10  
11  
12

13  
14 In the slum areas, the Census of Slum Areas and Floating Population 2014 was used for the selection  
15 of study sites<sup>16</sup>. Slums having  $\geq 300$  households were identified, and those with >500 households were  
16 further divided into smaller segments. Two segments from the Dhaka and Chattogram divisions and  
17 one from each of the other six divisions were randomly selected as study clusters.  
18  
19  
20

21  
22 For each cluster, data collectors first listed all households with individuals aged  $\geq 60$  years. A statistician  
23 then selected 80 households from the list using Simple Random Sampling to enroll 62 elderly people  
24 from a cluster. After selecting the households from a cluster, if there was any household with more than  
25 one person aged  $\geq 60$  years, we randomly selected one of them using the simple random sampling  
26 method. Figure 1 demonstrates how the participants were selected in the study.  
27  
28  
29  
30  
31  
32  
33  
34

35 Figure 1: Study flow chart of participants selection (aged  $\geq 60$  years)  
36  
37

## 38 Data Collection

39  
40 We collected data using a structured questionnaire, developed initially in English, and then translated  
41 into the local language. Data were collected using face to face interviews and physical measurements  
42 and were directly entered in tablet computers (Samsung Galaxy Tab A7) using a customized  
43 SurveyCTO application<sup>17</sup>. At the end of everyday data collection, data collectors uploaded all the  
44 collected data to the server. We measured the height (using locally made portable stadiometer), weight  
45 (using TANITA UM-070 weighing scale), waist circumference (using measuring tape), and blood  
46 pressure (using Omron HEM 7120) of the elderly people.  
47  
48  
49  
50  
51  
52

53 To collect data on self-reported hypertension, the data collector(s) asked the participant the following  
54 question - "Has a health care provider ever told you that you have high blood pressure, also called  
55 hypertension (other than during pregnancy)?" Before measuring blood pressure, the data collector  
56 ensured that the participant was in a resting condition for at least 15 minutes. There was a three minutes  
57  
58  
59  
60

1  
2  
3 interval between two subsequent measurements. If there was a gap of  $\geq 10$  mmHg between the first two  
4 measurements of either systolic or diastolic blood pressure or both, a third measurement was taken.  
5  
6

7  
8 Anthropometric measurements were taken based on WHO guidelines, as specified in the Food and  
9 Nutrition Technical Assistance (FANTA) anthropometry manual<sup>18</sup>. The weight was measured to the  
10 nearest 0.1 kg with light cloths, and height was measured to the nearest 0.1 cm in the standing position  
11 with no shoes. Waist circumference was measured to the nearest 0.1 cm at the end of a normal  
12 expiration, at the midpoint between the lower part of the last rib and the top of the hipbone, with the  
13 arms relaxed at the sides. Usually, we took two measurements of weight, height, and waist  
14 circumference, and if the gap between the two first measurements were  $>0.1$  kg for weight and  $>0.5$  cm  
15 for height and waist circumference, we took the third measurement.  
16  
17  
18  
19  
20  
21

## 22 Operational definitions

23  
24  
25 The outcome variable in our analysis was the hypertension status of elderly males and females.  
26 Hypertension was defined as systolic blood pressure  $\geq 140$  mmHg, or diastolic blood pressure  $\geq 90$   
27 mmHg or if the participants were told as hypertensive by any trained health care provider (self-  
28 reported)<sup>19</sup>. The variable was made dichotomous either as hypertensive (measured or self-reported)  
29 or as non-hypertensive to facilitate logistic regression.  
30  
31  
32

33  
34 We made a list of potential factors associated with hypertension among elderly people based on  
35 literature review and types of data collected by the survey. The socioeconomic factors were age (60-  
36 69 years vs. 70+ years), place of residence (rural, non-slum urban, and slum), education (no formal  
37 education, up to primary level, up to 10 completed years and  $>10$  completed years), wealth status,  
38 marital status (currently married vs. never married, divorced, widowed or separated), and religion  
39 (Muslim vs. others).  
40  
41  
42  
43

44  
45 The behavioral factors were physical activity, fruits, and vegetable consumption ( $\geq 5$  servings/day vs.  
46  $<5$  servings). An elderly person was considered doing sufficient physical activity (during work,  
47 transport, and recreational activities), if he or she reported at least 150 minutes of moderate-intensity  
48 physical activity per week or 75 minutes of heavy physical activity per week or equivalent<sup>20</sup>.  
49  
50  
51

52  
53 Body mass index, waist circumference, and self-reported diabetes were the anthropometric and clinical  
54 factors. We used the Asian cutoff to categorize Body Mass Index (BMI) into underweight ( $<18.5$   
55 kg/m<sup>2</sup>), normal ( $\geq 18.5$  to  $<23.0$  kg/m<sup>2</sup>), overweight ( $\geq 23.0$  to  $<27.5$  kg/m<sup>2</sup>, and obese ( $\geq 27.5$  kg/m<sup>2</sup>)  
56 <sup>21</sup>. Abdominal obesity was defined as the waist circumference of  $\geq 90$  cm in males and  $\geq 80$  cm in  
57 females<sup>22</sup>. For this analysis, we considered the average of the two closest measurements for blood  
58  
59  
60

1  
2  
3 pressure and all anthropometric variables. Self-reported diabetes was documented if any participant  
4 reported that a trained health care provider ever told him or her that he or she had diabetes.  
5  
6

## 7 8 Quality Assurance and Control 9

10 Data collectors and the field supervisors received extensive training on interviews, anthropometric  
11 measurements, and maintenance of data collection instruments and had gone through a rigorous  
12 standardization procedure. We field-tested the questionnaire, modified it, and refreshed the data  
13 collectors based on the findings of field testing. To ensure data quality, the field supervisors directly  
14 observed 5% of the interviews and re-interviewed another 5% of the randomly selected participants  
15 within 48 hours of the initial visit. Interim analyses were performed to check the data quality. All the  
16 measuring tools were calibrated routinely.  
17  
18  
19  
20  
21

## 22 23 Statistical Analysis 24

25 We performed all the data analysis using Stata 15.1 (Stata Corp, College Station, TX, USA)<sup>23</sup>. All  
26 the background characteristics are reported as categorical variables. We performed principal  
27 component analysis (PCA) to calculate wealth quintiles of the households of the participants. We  
28 estimated the weighted prevalence of hypertension for both elderly males and females. As the males  
29 and females differed by the distribution of risk factors and the prevalence of hypertension, we  
30 conducted separate bivariate and multivariable logistic regression, respectively, to identify the factors  
31 associated with hypertension. The variables with a p-value of  $\leq 0.2$  in the crude analysis were included  
32 in the multivariable logistic regression model<sup>24</sup>. Variance inflation factors (VIFs) were also checked  
33 to assess multi-collinearity among variables. We included both BMI and waist circumference  
34 separately in our initial analysis as both are important predictors of hypertension. But finally, we used  
35 the waist circumference in the regression model due to its high correlation with BMI ( $r = 0.87$ ,  $P$   
36  $< 0.001$ ) as well as its program implications as waist circumference can be easily measured and  
37 interpreted for screening in a low resource setting. Crude and adjusted odds ratios were estimated at  
38 95% confidence Intervals and the determinants with the p-value  $< 0.05$  were considered statistically  
39 significant.  
40  
41  
42  
43  
44  
45  
46  
47  
48  
49

## 50 51 Ethical considerations 52

53 The FSNSP 2018-19 obtained the ethical approval from the Institutional Review Board (IRB) of the  
54 BRAC James P Grant School of Public Health, BRAC University, Dhaka, Bangladesh (IRB Reference  
55 number: 2018-020-IR). Written informed consent was taken from the respondents before data  
56 collection and measurements.  
57  
58  
59  
60

## Results

**Table 1** describes the characteristics of the study participants. The median (interquartile range) age of the participants was 65.8 (62.4, 71.8) years. The female participants were 48.4%, and the rural area contributed 72.0% of the study subjects. More females (77.1%) were identified without any formal education compared to their male counterparts (48.9%). Only one in every four females and 92% of the males were found married at the time of the survey. Above one-third of the participants from both sexes (42% of males and 45% of females) reported insufficient physical activity. Daily fruits and vegetable consumption of 9 out of 10 elderly were <5 servings. A higher proportion (34.4%) of females were overweight or obese than males (28.0%). Abdominal obesity was identified among 23% of males and 41% of females. About 11% of elderly males and 13% of elderly females reported having diabetes.

**Table 1: Background characteristics of the study population by sex**

**Figure 2** demonstrates the distribution of a few selected behavioral and clinical characteristics across the places of residence and sexes. In our study, the prevalence of these risk factors is higher among elderly females compared to their male counterparts except for insufficient physical activity in urban areas. Almost 80% of males and 78% of females of the non-slum urban area reported performing an insufficient physical activity, which is around 40% in both rural and slum areas. Overall, 91% of the elderly were consuming inadequate fruits and vegetables, which was 94% in females and 87% in males. However, above 98% of slum women failed to consume the recommended servings of fruits and vegetables. Overweight/obesity was also highest in urban females, which was about 38% compared to 22% in urban males. Similarly, 60% of urban females were identified with abdominal obesity.

Figure 2: Selected behavioral and clinical characteristics by area of residence and gender

**Table 2** shows the prevalence of hypertension according to the characteristics of the participants and how it differs between males and females. In total, more females (56%) were identified as hypertensive than males (42%). Urban elderly females had the highest prevalence of hypertension (63%), whereas the male slum dwellers had the lowest (30%). The wealthiest of the population had the highest prevalence of hypertension in both sexes (51% in males and 62% in females). Married elderly males had a lower prevalence of hypertension (41%) compared to those who were not married during the

1  
2  
3 survey (58%). The prevalence of hypertension increased with age, education, body mass index, and  
4 waist circumference in both sexes. However, the prevalence of hypertension was lower among those  
5 who reported sufficient physical activity, and adequate consumption of fruits and vegetables.  
6  
7  
8

9 **Table 2: Prevalence of hypertension according to background characteristics among elderly**  
10 **males and females (weighted) with 95% Confidence Interval**  
11  
12  
13  
14

15 We reported the results of bivariate and multivariable logistic regressions in **Table 3**. In bivariate  
16 analysis, we found that all the selected variables were significantly associated with hypertension in  
17 males, whereas in females, we found that age, place of residence, education, wealth index, marital  
18 status, physical activity, BMI, waist circumference and diabetes were significantly associated with  
19 hypertension. However, in multivariate analysis, we found that age  $\geq 70$  years [AOR with 95%CI: 1.37  
20 (1.13,1.66) for males and 1.40 (1.15,1.70) for females] compared to 60-69 years; education above 10<sup>th</sup>  
21 grade [AOR with 95%CI: 1.98 (1.49,2.63) for males and 2.50 (1.01,6.21) for females] compared to  
22 those with no formal education; insufficient physical activity [AOR with 95%CI: 1.53 (1.27,1.83) and  
23 1.40 (1.17,1.69)] compared to recommended amount of physical activity; abdominal obesity [AOR with  
24 95%CI: 2.81 (2.26,3.49) and 2.21 (1.82,2.67)] with refer to no abdominal obesity i.e. normal waist  
25 circumference (Male:  $<90$  cm/ Female:  $<80$  cm); and self-reported diabetes [AOR with 95%CI: 1.40  
26 (1.05,1.87) and 1.83 (1.36,2.46)] compared to no reported diabetes. Additionally, living in slums  
27 decreased odds of hypertension [AOR with 95%CI: 0.68 (0.50,0.92)] among males compared to rural  
28 residents. We also ran an alternative multivariable logistic regression model including BMI as an  
29 independent variable and provided the results in **supplementary table 1**.  
30  
31  
32  
33  
34  
35  
36  
37  
38  
39  
40

## 41 Discussion

42  
43  
44

45 In our study, the overall prevalence of hypertension among the elderly people of Bangladesh was 49%,  
46 which is similar to the south Asian prevalence of hypertension among elderlies aged  $\geq 65$  years (53%)  
47 but lower than the average prevalence in the low and middle-income countries (66%) reported in a  
48 recent systematic review and meta-analysis<sup>25</sup>. The prevalence is still lower than the prevalence of  
49 hypertension in high-income countries. In a systematic analysis, Katherine et al. demonstrated that, in  
50 2010, prevalence of hypertension among the high-income countries was 60.8% (male: 55.3%; female:  
51 60.9%) and 73.6% (male: 65.6%; female: 77.5%) in the age groups 60-69 years and 70+ years,  
52 respectively<sup>26</sup>. However, our reported prevalence is higher than the prevalence previously estimated  
53 in Bangladesh demographic and health survey 2011, which was 35% and 40% for the age groups 60-  
54 69 and 70+ years, respectively<sup>27</sup>. The increase in the prevalence of hypertension may be due to recent  
55  
56  
57  
58  
59  
60



1  
2  
3 advancements in the economy and infrastructure of the country, leading the people into sedentary  
4 lifestyles and stress <sup>28-30</sup>. Hypertension is considered as the most important modifiable risk factor of  
5 cardiovascular diseases worldwide <sup>31</sup>. It has been shown that hypertension is responsible for nearly  
6 30% of all cardiovascular diseases, and a person with hypertension has nearly three times the  
7 likelihood of having cardiovascular incidents compared to non-hypertensive individuals <sup>11</sup>. As a major  
8 contributor to cardiovascular diseases, hypertension causes a major proportion of ischemic heart  
9 diseases, heart failure, renal failure, as well as cerebrovascular diseases such as stroke <sup>32</sup>. As almost  
10 half of the population in the elderly age group in Bangladesh is hypertensive, we can indisputably  
11 assert that Bangladesh must take immediate steps to address this problem. Policymakers need to pay  
12 special attention while designing the screening and intervention program considering the health and  
13 wellbeing of the elderly people.  
14  
15  
16  
17  
18  
19  
20  
21

22 After segregating by sex, the prevalence of hypertension was 42% and 56% for males, and females,  
23 respectively. This higher prevalence among females is supported by several studies in Bangladesh and  
24 elsewhere <sup>33</sup>. It may be due to a lack of ovarian hormones during the postmenopausal period. Studies  
25 suggested that ovarian hormones, especially estrogen, may have the potentials to keep the blood  
26 pressure lower in premenopausal women, and lack of it may be responsible for elevated blood pressure  
27 in postmenopausal women <sup>34</sup>. Moreover, our findings indicate that women, at their advanced age,  
28 become socially more vulnerable to hypertension. For example, three out of four elderly women did  
29 not have a spouse, and it may affect their health care seeking and treatment. The government should  
30 pay additional attention to design customized screening and awareness programs for elderly people  
31 with special attention to the vulnerability of women.  
32  
33  
34  
35  
36  
37  
38  
39

40 Our study corroborated the fact that the odds of developing hypertension increases with age in both  
41 sexes. Studies conducted in Bangladesh <sup>13</sup>, India <sup>35</sup>, Pakistan <sup>36</sup>, Nepal <sup>37</sup>, Indonesia <sup>38</sup>, and China <sup>39</sup>,  
42 have shown that the older age group had a higher prevalence of hypertension. The biological effect of  
43 the increased arterial resistance due to age-related changes in the arterial wall, i.e., thickening of the  
44 arterial wall in old ages, may contribute to high-risk of hypertension in older ages <sup>40</sup>. Bangladesh is in  
45 the midst of a huge demographic transition, and with the decreasing trend of birth and death rate, the  
46 proportion of the elderly population is growing, which will eventually add more hypertensive patients  
47 and create more pressure on the already over-burdened health system of the country. In this study,  
48 insufficient physical activity increased the odds of having hypertension in both sexes. Elderlies, who  
49 reported less than 150 minutes of moderate-intensity or equivalent physical activity per week, had  
50 around 1.5 times more odds of having hypertension compared to those with 150 minutes or more such  
51 physical activity. This finding is supported by numerous studies <sup>13 37 41</sup>. Besides, physical inactivity  
52 was also found associated directly with stroke and ischemic heart diseases <sup>42</sup>. Elderly males and  
53 females with higher waist circumference had three times and two times more odds of having  
54  
55  
56  
57  
58  
59  
60



1  
2  
3 hypertension, respectively, with refer to those with lower or normal waist circumference. Several  
4 studies have reported that waist circumference, as it represents abdominal obesity, is a better predictor  
5 of hypertension compared to BMI <sup>43 44</sup>.  
6  
7

8  
9 In our analysis, fruits and vegetable consumption was not found significantly associated with  
10 hypertension in both sexes. In the case of hypertension, fruit and vegetable consumption usually helps  
11 with increased potassium intake. But in Bangladesh, improper processing, such as washing after  
12 cutting or over-cooking, may reduce the amount of potassium <sup>45 46</sup>. Also, not all fruits and vegetables  
13 have a high level of potassium. However, this should be studied further to explore the causal pathway  
14 between hypertension and fruits & vegetables.  
15  
16  
17  
18

19  
20 Among other factors, a higher level of education was responsible for the increased odds of having  
21 hypertension. Elderly males and females with more than ten years of education had about two times  
22 higher odds of having hypertension compared to those without any formal education. Kibria et al.  
23 found similar results analyzing the data from the Bangladesh Demographic and Health Survey 2011  
24 <sup>13</sup>. Education levels may elevate wealth status, which makes the people used to a sedentary lifestyle,  
25 and eventually may increase the odds of hypertension <sup>47</sup>. However, the wealth index did not show any  
26 such clear pattern, although elderlies in the upper wealth quintiles had a relatively higher prevalence  
27 of hypertension [Table 2]. In this study, living in slums was associated with lower odds of hypertension  
28 though it was not statistically significant in the case of the females. Self-reported diabetes was also  
29 increased odds of having hypertension in both males and females in this age group of the population,  
30 which is supported by several studies in Bangladesh and elsewhere <sup>48-50</sup>.  
31  
32  
33  
34  
35  
36  
37  
38  
39  
40  
41  
42  
43  
44  
45  
46  
47  
48  
49  
50  
51  
52  
53  
54  
55  
56  
57  
58  
59  
60

## Recommendations

Risk factors such as insufficient physical activity and obesity are mostly modifiable by appropriate education and control programs with support from the health and other sectors of the government. The early diagnosis of hypertension and other health problems is critical for controlling hypertension and the prevention of hypertension-related complications. However, the sex difference in the prevalence of and factors associated with hypertension indicated that a universal prevention and control strategy might not work in this age group of population. Instead, the government should design a specific screening and control program to reduce the number of cases by early diagnosis and control and eventually minimize further complications of hypertension. Besides, education programs should immediately be initiated to raise awareness among the elderly males and females as well as their family members on healthy lifestyles. The introduction of geriatric health care with the general health care system at the primary health care level can be a crucial step in improving the overall health of elderly people.

## Strengths and limitations

Prevalence of hypertension among elderly people was reported in several studies in Bangladesh. However, to the best of our knowledge, this is the first-ever nationally representative survey in Bangladesh investigating the prevalence and associated factors of hypertension among the elderly people. The limitations of the study include sampling challenges at the field level. The data collectors faced higher refusal rates in wealthier non-slum urban areas and a few isolated rural communities. Besides, seven selected rural clusters were dropped from the survey due to administrative and financial constraints, which may affect the national representativeness in the study. Among other limitations, blood pressure measurements were taken on a single day rather than longitudinal measurements on different days to confirm the diagnosis of hypertension. Also, the associations we have found in our study might not be causal due to lack of temporality, as the study was a cross-sectional one. Besides, we could not adjust for some strong confounders, such as salt consumption, genetic factors<sup>51 52</sup>. However, these limitations emphasize the importance of further research on the determinants of hypertension among the elderly people of Bangladesh. We also recommend studying the sex difference in the physiology and pathophysiology of hypertension by exploring the effects of gonadal hormones and sex chromosomes on blood pressure to yield customized management of hypertension separately for both males and females.

## Conclusions

As per the findings of our study, about half of the Bangladeshi elderlies were hypertensive, and hypertension was more prevalent among elderly females in terms of sociodemographic, behavioral, and biological characteristics. Extreme old age ( $\geq 70$  years), education above 10th grade, insufficient

1  
2  
3 physical activity, abdominal obesity (higher waist circumference), and self-reported diabetes was  
4 associated with increased odds of hypertension in Bangladeshi elderly population. Additionally, living  
5 in slums had lower odds of hypertension among elderly males. The government of Bangladesh should  
6 take a multisectoral approach involving health, economic, education, and social welfare sectors to  
7 promote healthy lifestyles among the elderly people and their families and provide emphasis on early  
8 diagnosis and treatment to prevent complications of hypertension among the elderly population.  
9  
10  
11  
12  
13

## 14 References

- 15 1. United Nations DoEaSA, Population Division. World population ageing, 2017 highlights  
16 (ST/ESA/SER.A/397)2017.
- 17 2. World Health Organization. Ageing and health 2018, February 5 [Available from:  
18 <https://www.who.int/news-room/fact-sheets/detail/ageing-and-health> accessed February 9,  
19 2020.
- 20 3. World Health Organization. WHO | Proposed working definition of an older person in Africa  
21 for the MDS Project. *WHO* 2002
- 22 4. Rahman KMM. Unnayan Onneshan Policy Brief on Present Social Context and Elderly  
23 Population in Bangladesh.13.
- 24 5. Barikdar A, Ahmed T, Lasker SP. The Situation of the Elderly in Bangladesh. *Bangladesh J*  
25 *Bioethics* 2016;7(1):27-36. doi: 10.3329/bioethics.v7i1.29303
- 26 6. Jahangir AR. Bangladesh faces a challenge to ensure welfare of its aging population | Inter  
27 Press Service. 2019.
- 28 7. World Health Organization. Hypertension 2020 [Available from: [https://www.who.int/health-](https://www.who.int/health-topics/hypertension/)  
29 [topics/hypertension/](https://www.who.int/health-topics/hypertension/) accessed February 9, 2020.
- 30 8. World Health Organization. Q&As on hypertension [updated 2015, September. Available  
31 from: <https://www.who.int/features/qa/82/en/> accessed February 9, 2020.
- 32 9. World Health Organization. Raised blood pressure: Situation and trends 2020 [Available  
33 from: [https://www.who.int/gho/ncd/risk\\_factors/blood\\_pressure\\_prevalence\\_text/en/](https://www.who.int/gho/ncd/risk_factors/blood_pressure_prevalence_text/en/)  
34 accessed February 10 2020.
- 35 10. World Health Organization. Global health risks: mortality and burden of disease attributable  
36 to selected major risks. Geneva, Switzerland, 2009:62.
- 37 11. Khanam F, Hossain MB, Mistry SK, et al. Prevalence and Risk Factors of Cardiovascular  
38 Diseases among Bangladeshi Adults: Findings from a Cross-sectional Study. *J Epidemiol Glob*  
39 *Health* 2019;9(3):176-84. doi: 10.2991/jegh.k.190531.001 [published Online First:  
40 2019/09/19]
- 41 12. Mosley WJ, Lloyd-Jones DM. Epidemiology of Hypertension in the Elderly. *Clinics in Geriatric*  
42 *Medicine* 2009;25(2):179-89 %U  
43 <https://linkinghub.elsevier.com/retrieve/pii/S0749069009000032>.
- 44 13. Al Kibria GM, Burrowes V, Choudhury A, et al. Sex differences in prevalence and associated  
45 factors of prehypertension and hypertension among Bangladeshi adults. *International*  
46 *Journal of Cardiology Hypertension* 2019;1:100006 %U  
47 <http://www.sciencedirect.com/science/article/pii/S2590086219300060>.
- 48 14. Khanam MA, Lindeboom W, Razzaque A, et al. Undiagnosed and uncontrolled hypertension  
49 among the adults in rural Bangladesh: findings from a community-based study. *Journal of*  
50 *hypertension* 2015;33(12):2399-406. doi: 10.1097/HJH.0000000000000712
- 51 15. Bangladesh Bureau of Statistics (BBS). Population & Housing Census: Preliminary Results,  
52 2011.
- 53 16. Bangladesh Bureau of Statistics (BBS). Census of Slum Areas and Floating Population 2014  
54 2015.

17. Dobility Inc. %U <https://www.surveycto.com> [program].
18. Cogill B. Anthropometric Indicators Measurement Guide, 2003.
19. Rocella J. THE SEVENTH REPORT OF THE JOINT NATIONAL COMMITTEE ON PREVENTION, DETECTION, EVALUATION, AND TREATMENT OF HIGH BLOOD PRESSURE. THE JNC 7 REPORT. 2003:3.
20. World Health O. Global recommendations on physical activity for health. %@ 978-92-4-159997-9 %U <http://www.ncbi.nlm.nih.gov/books/NBK3050572010>.
21. W. H. O. Expert Consultation. Appropriate body-mass index for Asian populations and its implications for policy and intervention strategies. *Lancet* 2004;363(9403):157-63. doi: 10.1016/S0140-6736(03)15268-3 [published Online First: 2004/01/17]
22. Misra A, Vikram NK, Gupta R, et al. Waist circumference cutoff points and action levels for Asian Indians for identification of abdominal obesity. *Int J Obes (Lond)* 2006;30(1):106-11. doi: 10.1038/sj.ijo.0803111 [published Online First: 2005/09/29]
23. StataCorp. Stata Statistical Software: Release 15. *College Station, TX: StataCorp LLC* 2017
24. Maldonado G, Greenland S. Simulation study of confounder-selection strategies. *American journal of epidemiology* 1993;138(11):923-36 @ 1476-6256.
25. Sarki AM, Nduka CU, Stranges S, et al. Prevalence of Hypertension in Low- and Middle-Income Countries: A Systematic Review and Meta-Analysis. *Medicine* 2015;94(50):e1959 %U [https://journals.lww.com/md-journal/FullText/2015/12150/Prevalence\\_of\\_Hypertension\\_in\\_Low\\_and.5.aspx](https://journals.lww.com/md-journal/FullText/2015/12150/Prevalence_of_Hypertension_in_Low_and.5.aspx).
26. Mills KT, Bundy JD, Kelly TN, et al. Global Disparities of Hypertension Prevalence and Control: A Systematic Analysis of Population-based Studies from 90 Countries. *Circulation* 2016;134(6):441-50 %U <https://www.ncbi.nlm.nih.gov/pmc/articles/PMC4979614/>.
27. Rahman MM, Gilmour S, Akter S, et al. prevalence and control of hypertension in Bangladesh: a multilevel analysis of a nationwide population-based survey. *Journal of hypertension* 2015;33(3):465-72; discussion 72. doi: 10.1097/HJH.0000000000000421 [published Online First: 2014/11/08]
28. Atkinson K, Lowe S, Moore S. Human development, occupational structure and physical inactivity among 47 low and middle income countries. *Preventive Medicine Reports* 2016;3:40-45. doi: 10.1016/j.pmedr.2015.11.009
29. Martin SL, Kirkner GJ, Mayo K, et al. Urban, rural, and regional variations in physical activity. *The Journal of Rural Health: Official Journal of the American Rural Health Association and the National Rural Health Care Association* 2005;21(3):239-44. doi: 10.1111/j.1748-0361.2005.tb00089.x
30. Bishwajit G, Ide S, Hossain MA, et al. Trade Liberalization, Urbanization and Nutrition Transition in Asian Countries. *Journal of Nutritional Health & Food Science* 2014;2(1) doi: 10.15226/jnhfs.2014.00109
31. Collaborators GBDRF. Global, regional, and national comparative risk assessment of 84 behavioural, environmental and occupational, and metabolic risks or clusters of risks for 195 countries and territories, 1990-2017: a systematic analysis for the Global Burden of Disease Study 2017. *Lancet* 2018;392(10159):1923-94. doi: 10.1016/S0140-6736(18)32225-6 [published Online First: 2018/11/30]
32. Lionakis N, Mendrinou D, Sanidas E, et al. Hypertension in the elderly. *World Journal of Cardiology* 2012;4(5):135-47 %U <https://www.ncbi.nlm.nih.gov/pmc/articles/PMC3364500/>.
33. Rahman M, Zaman MM, Islam JY, et al. prevalence, treatment patterns, and risk factors of hypertension and pre-hypertension among Bangladeshi adults. *Journal of human hypertension* 2018;32(5):334-48. doi: 10.1038/s41371-017-0018-x [published Online First: 2017/12/13]
34. Dubey RK, Oparil S, Imthurn B, et al. Sex hormones and hypertension. *Cardiovascular Research* 2002;53(3):688-708. doi: 10.1016/s0008-6363(01)00527-2

- 1  
2  
3 35. Bhise MD, Patra S. Prevalence and correlates of hypertension in Maharashtra, India: A  
4 multilevel analysis. *PLoS one* 2018;13(2):e0191948. doi: 10.1371/journal.pone.0191948  
5 [published Online First: 2018/02/06]  
6  
7 36. Basit A, Tanveer S, Fawwad A, et al. Prevalence and contributing risk factors for  
8 hypertension in urban and rural areas of Pakistan; a study from second National Diabetes  
9 Survey of Pakistan (NDSP) 2016-2017. *Clin Exp Hypertens* 2020;42(3):218-24. doi:  
10 10.1080/10641963.2019.1619753 [published Online First: 2019/06/04]  
11  
12 37. Hasan M, Sutradhar I, Akter T, et al. Prevalence and determinants of hypertension among  
13 adult population in Nepal: Data from Nepal Demographic and Health Survey 2016. *PLoS one*  
14 2018;13(5):e0198028 %U  
15 <https://journals.plos.org/plosone/article?id=10.1371/journal.pone.28>.  
16  
17 38. Peltzer K, Pengpid S. The Prevalence and Social Determinants of Hypertension among Adults  
18 in Indonesia: A Cross-Sectional Population-Based National Survey. *International Journal of*  
19 *Hypertension*, 2018.  
20  
21 39. Song H, Feng D, Wang R, et al. The urban-rural disparity in the prevalence and risk factors of  
22 hypertension among the elderly in China-a cross-sectional study. *PeerJ* 2019;7:e8015. doi:  
23 10.7717/peerj.8015 [published Online First: 2019/12/19]  
24  
25 40. Shukuri A, Tewelde T, Shaweno T. Prevalence of old age hypertension and associated factors  
26 among older adults in rural Ethiopia. [https://www.dovepress.com/prevalence-of-old-age-](https://www.dovepress.com/prevalence-of-old-age-hypertension-and-associated-factors-among-older-peer-reviewed-fulltext-article-IBPC)  
27 [hypertension-and-associated-factors-among-older--peer-reviewed-fulltext-article-IBPC](https://www.dovepress.com/prevalence-of-old-age-hypertension-and-associated-factors-among-older-peer-reviewed-fulltext-article-IBPC).  
28 *Integrated Blood Pressure Control*, 2019.  
29  
30 41. Hypertension Study G. Prevalence, awareness, treatment and control of hypertension  
31 among the elderly in Bangladesh and India: a multicentre study. *Bulletin of the World Health*  
32 *Organization* 2001;79(6):490-500.  
33  
34 42. Lawes CM, Vander Hoorn S, Rodgers A, et al. Global burden of blood-pressure-related  
35 disease, 2001. *Lancet* 2008;371(9623):1513-8. doi: 10.1016/S0140-6736(08)60655-8  
36 [published Online First: 2008/05/06]  
37  
38 43. Hirani V, Zaninotto P, Primatesta P. Generalised and abdominal obesity and risk of diabetes,  
39 hypertension and hypertension-diabetes co-morbidity in England. *Public Health Nutr*  
40 2008;11(5):521-7. doi: 10.1017/S1368980007000845 [published Online First: 2007/09/05]  
41  
42 44. Yalcin BM, Sahin EM, Yalcin E. Which anthropometric measurements is most closely related  
43 to elevated blood pressure? *Family Practice* 2005;22(5):541-47. doi: 10.1093/fampra/cmi043  
44  
45 45. Martínez-Pineda M, Yagüe-Ruiz C, Caverni-Muñoz A, et al. Reduction of potassium content  
46 of green bean pods and chard by culinary processing. *Tools for chronic kidney disease.*  
47 *Nefrología (English Edition)* 2016;36(4):427-32. doi: 10.1016/j.nefro.2016.03.009  
48  
49 46. Noubiap JJN, Bigna JJR, Nansseu JRN. Low Sodium and High Potassium Intake for  
50 Cardiovascular Prevention: Evidence Revisited With Emphasis on Challenges in Sub-Saharan  
51 Africa. *The Journal of Clinical Hypertension* 2015;17(1):81-83. doi: 10.1111/jch.12439  
52  
53 47. Yabiku ST, Schlabach S. Social Change and the Relationships Between Education and  
54 Employment. *Population Research and Policy Review* 2009;28(4):533-49. doi:  
55 10.1007/s11113-008-9117-2  
56  
57 48. Chowdhury MA, Uddin MJ, Haque MR, et al. Hypertension among adults in Bangladesh:  
58 evidence from a national cross-sectional survey. *BMC cardiovascular disorders* 2016;16:22.  
59 doi: 10.1186/s12872-016-0197-3  
60  
61 49. Craig LS, Gage AJ, Thomas AM. Prevalence and predictors of hypertension in Namibia: A  
62 national-level cross-sectional study. *PLoS one* 2018;13(9):e0204344. doi:  
63 10.1371/journal.pone.0204344  
64  
65 50. Da-Mata FAF, Galvao TF, Pereira MG, et al. Prevalence of Self-Reported Diabetes and Its  
66 Associated Factors: A Population-Based Study in Brazil. *Int J Endocrinol* 2015;2015 doi:  
67 10.1155/2015/610790



- 1  
2  
3 51. Everett B, Zajacova A. Gender Differences in Hypertension and Hypertension Awareness  
4 Among Young Adults. *Biodemography and social biology* 2015;61(1):1-17 %U  
5 <https://www.ncbi.nlm.nih.gov/pmc/articles/PMC4896734/>.  
6  
7 52. Ha SK. Dietary salt intake and hypertension. *Electrolyte Blood Press* 2014;12(1):7-18. doi:  
8 10.5049/EBP.2014.12.1.7 [published Online First: 2014/07/26]  
9  
10  
11  
12

13 **Contributors** AAMH conceptualized and conducted the data analysis and drafted the initial  
14 manuscript. AAS, MH, MMH, MSAK, MHe, MAU, SKS, SMMR, DKM were involved in the  
15 conceptualization and design of the study as well as reviewed and approved the final version of the  
16 manuscript. MKM led the conceptualization/design of the survey and supervision of data collection,  
17 critically reviewed the manuscript, and approved the final version of the manuscript.  
18  
19  
20

21 **Acknowledgment** We are thankful to all the study participants, data collectors, field supervisors, and  
22 managers of the national nutrition surveillance round 2018-19.  
23  
24  
25

26 **Funding** The study was funded by the National Nutrition Services (NNS), Institute of Public Health  
27 Nutrition, Ministry of Health and Family Welfare, Government of Bangladesh (Memo:  
28 45.165.032.01.00.003.2016-325; Date: 10-12-2017)  
29  
30  
31

32 **Patient and public involvement** No patients or public were directly involved in conceptualization,  
33 design, data collection, or dissemination of this study. However, the data collection supervisors  
34 explained the study procedure and purpose to the local leaders to receive community consent.  
35  
36  
37

38 **Competing interests** None declared.  
39  
40  
41

42 **Patient consent for publication** Not applicable.  
43  
44

45 **Ethics approval** The study obtained ethical approval from the Institutional Review Board (IRB) of  
46 the BRAC James P Grant School of Public Health, BRAC University, Dhaka, Bangladesh  
47  
48  
49

50 **Provenance and peer review** Not commissioned, externally peer-reviewed  
51  
52  
53

54 **Data availability statement** Data may be available upon reasonable request. All such requests can be  
55 sent to Mr. Kuhel Faizul Islam, IRB Coordinator, BRAC James P Grant School of Public Health,  
56 BRAC University, Dhaka, Bangladesh to the email address: [kuhel@bracu.ac.bd](mailto:kuhel@bracu.ac.bd)  
57  
58  
59  
60

**Table 1: Background characteristics of the study population by hypertension (no/yes) and sex (male/female)**

| Variables                       | Overall      | Hypertension |              | Sex          |              |
|---------------------------------|--------------|--------------|--------------|--------------|--------------|
|                                 |              | No           | Yes          | Male         | Female       |
|                                 | N=4,813      | N=2,345      | N=2,468      | N=2,482      | N=2,335      |
|                                 | n(%)*        | n(%)*        | n(%)*        | n(%)*        | n(%)*        |
| Sex                             |              |              |              |              |              |
| Male                            | 2,482 (51.6) | 1,401 (59.7) | 1,081 (43.8) | --           | --           |
| Female                          | 2,331 (48.4) | 944 (40.3)   | 1,387 (56.2) | --           | --           |
| Age Group (in Years)            |              |              |              |              |              |
| 60 to 69 years                  | 3,223 (67.0) | 1,668 (71.1) | 1,555 (63.0) | 1,725 (69.5) | 1,500 (64.3) |
| 70 years and above              | 1,589 (33.0) | 677 (28.9)   | 912 (37.0)   | 757 (30.5)   | 834 (35.7)   |
| Place of Residence              |              |              |              |              |              |
| Rural                           | 3,463 (72.0) | 1,757 (74.9) | 1,706 (69.1) | 1,835 (73.9) | 1,628 (69.7) |
| Non-slum urban                  | 806 (16.7)   | 292 (12.5)   | 514 (20.8)   | 394 (15.9)   | 413 (17.7)   |
| Slum                            | 544 (11.3)   | 296 (12.6)   | 248 (10.0)   | 253 (10.2)   | 294 (12.6)   |
| Educational status              |              |              |              |              |              |
| No education                    | 3,012 (62.6) | 1,532 (65.3) | 1,480 (60.0) | 1,214 (48.9) | 1,800 (77.1) |
| Up to 5th grade                 | 556 (11.6)   | 302 (12.9)   | 254 (10.3)   | 342 (13.8)   | 216 (9.3)    |
| Up to 10th grade                | 843 (17.5)   | 376 (16.0)   | 467 (18.9)   | 567 (22.8)   | 276 (11.8)   |
| Above 10th grade                | 402 (8.4)    | 135 (5.8)    | 267 (10.8)   | 359 (14.5)   | 43 (1.8)     |
| Wealth Quintile                 |              |              |              |              |              |
| Least wealthy (Q1)              | 966 (20.1)   | 531 (22.7)   | 435 (17.6)   | 543 (21.9)   | 423 (18.1)   |
| Lower (Q2)                      | 968 (20.1)   | 500 (21.3)   | 468 (19.0)   | 485 (19.5)   | 484 (20.7)   |
| Middle (Q3)                     | 962 (20.0)   | 445 (19.0)   | 517 (20.9)   | 494 (19.9)   | 469 (20.1)   |
| Upper (Q4)                      | 957 (19.9)   | 475 (20.3)   | 482 (19.5)   | 491 (19.8)   | 467 (20.0)   |
| Wealthiest (Q5)                 | 959 (19.9)   | 393 (16.8)   | 566 (22.9)   | 469 (18.9)   | 491 (21.0)   |
| Marital Status                  |              |              |              |              |              |
| Currently married               | 2,860 (59.4) | 1,558 (66.4) | 1,302 (52.8) | 2,277 (91.7) | 584 (25.0)   |
| Others**                        | 1,953 (40.6) | 787 (33.6)   | 1,166 (47.2) | 205 (8.3)    | 1,751 (75.0) |
| Religion                        |              |              |              |              |              |
| Muslim                          | 4,073 (84.6) | 2,005 (85.5) | 2,068 (83.8) | 2,113 (85.1) | 1,962 (84.0) |
| Others***                       | 740 (15.4)   | 340 (14.5)   | 400 (16.2)   | 369 (14.9)   | 373 (16.0)   |
| Physical Activity               |              |              |              |              |              |
| ≥150 Minutes/week               | 2,706 (56.2) | 1,498 (63.9) | 1,208 (48.9) | 1,433 (57.7) | 1,274 (54.6) |
| <150 Minutes/week               | 2,107 (43.8) | 847 (36.1)   | 1,260 (51.1) | 1,049 (42.3) | 1,061 (45.4) |
| Fruits & Vegetables Consumption |              |              |              |              |              |
| ≥5 servings/day                 | 450 (9.3)    | 253 (10.8)   | 197 (8.0)    | 320 (12.9)   | 130 (5.6)    |
| <5 servings/day                 | 4,363 (90.7) | 2,092 (89.2) | 2,271 (92.0) | 2,162 (87.1) | 2,205 (94.4) |
| BMI Category (Asian)            |              |              |              |              |              |
| Normal                          | 2,077 (45.1) | 1,098 (48.2) | 979 (42.1)   | 1,145 (47.5) | 932 (42.4)   |
| Underweight                     | 1,099 (23.9) | 715 (31.4)   | 384 (16.5)   | 589 (24.4)   | 511 (23.2)   |
| Overweight                      | 1,084 (23.5) | 390 (17.1)   | 694 (29.8)   | 554 (23.0)   | 530 (24.1)   |
| Obese                           | 345 (7.5)    | 76 (3.3)     | 269 (11.6)   | 121 (5.0)    | 226 (10.3)   |
| Waist Circumference             |              |              |              |              |              |
| Male: <90 cm/ Female: <80 cm    | 3,226 (68.5) | 1,859 (80.4) | 1,367 (57.0) | 1,887 (77.1) | 1,340 (59.1) |



|                                          |              |              |              |              |              |
|------------------------------------------|--------------|--------------|--------------|--------------|--------------|
| Male: $\geq 90$ cm/ Female: $\geq 80$ cm | 1,485 (31.5) | 452 (19.6)   | 1,033 (43.0) | 560 (22.9)   | 927 (40.9)   |
| Self-reported diabetes                   |              |              |              |              |              |
| No                                       | 4,234 (88.0) | 2,167 (92.4) | 2,067 (83.8) | 2,212 (89.1) | 2,026 (86.8) |
| Yes                                      | 579 (12.0)   | 178 (7.6)    | 401 (16.2)   | 270 (10.9)   | 309 (13.2)   |

\* Column percentages

\*\* Never married, widows, divorced and separated

\*\*\* Hindu, Christian, Buddhist and others

**Table 2: Prevalence of hypertension according to background characteristics among elderly males and females (weighted) with 95% Confidence Interval (CI)<sup>‡</sup>**

| Variables                       | Overall           | Male              | Female            |
|---------------------------------|-------------------|-------------------|-------------------|
|                                 | % (95% CI)        | % (95% CI)        | % (95% CI)        |
| Overall                         | 49.0 (45.2, 52.9) | 42.4 (37.4, 47.6) | 56.3 (52.1, 60.4) |
| Age Group (in Years)            |                   |                   |                   |
| 60 to 69 years                  | 47.6 (43.9, 51.4) | 40.7 (35.3, 46.3) | 55.2 (50.2, 60.0) |
| 70 years and above              | 51.5 (45.4, 57.6) | 45.5 (37.9, 53.3) | 58.4 (52.9, 63.7) |
| Place of Residence              |                   |                   |                   |
| Rural                           | 49.0 (45.0, 52.9) | 42.4 (37.3, 47.7) | 56.2 (51.9, 60.5) |
| Non-slum urban                  | 53.1 (48.4, 57.8) | 44.9 (38.5, 51.4) | 62.9 (57.7, 67.8) |
| Slum                            | 39.7 (32.4, 47.4) | 29.7 (24.0, 36.1) | 50.3 (40.9, 59.6) |
| Educational status              |                   |                   |                   |
| No education                    | 46.9 (42.6, 51.2) | 34.4 (29.2, 40.0) | 55.6 (51.0, 60.2) |
| Up to 5 <sup>th</sup> grade     | 49.0 (40.3, 57.8) | 44.1 (31.8, 57.2) | 57.1 (47.4, 66.2) |
| Up to 10 <sup>th</sup> grade    | 50.6 (45.0, 56.1) | 47.4 (41.0, 53.8) | 58.8 (47.3, 69.5) |
| Above 10 <sup>th</sup> grade    | 66.8 (58.3, 74.3) | 65.7 (56.8, 73.6) | 81.2 (48.5, 95.2) |
| Wealth Quintile                 |                   |                   |                   |
| Least wealthy (Q1)              | 44.9 (38.8, 51.1) | 39.3 (31.9, 47.1) | 52.4 (43.5, 61.1) |
| Lower (Q2)                      | 48.4 (43.8, 53.0) | 39.0 (33.9, 44.3) | 57.5 (51.4, 63.3) |
| Middle (Q3)                     | 51.2 (45.3, 57.1) | 45.1 (38.1, 52.2) | 58.2 (50.4, 65.7) |
| Upper (Q4)                      | 46.4 (38.0, 55.1) | 41.2 (31.5, 51.8) | 52.2 (41.1, 63.1) |
| Wealthiest (Q5)                 | 56.5 (51.2, 61.7) | 51.3 (44.6, 57.8) | 61.7 (51.9, 70.6) |
| Marital Status                  |                   |                   |                   |
| Currently married               | 44.9 (40.7, 49.2) | 41.4 (36.3, 46.8) | 54.0 (48.2, 59.7) |
| Others*                         | 57.8 (53.6, 61.9) | 57.8 (48.6, 66.4) | 57.8 (53.2, 62.3) |
| Religion                        |                   |                   |                   |
| Muslim                          | 48.5 (44.0, 53.0) | 41.7 (36.0, 47.6) | 56.1 (51.3, 60.8) |
| Others**                        | 51.6 (47.4, 55.8) | 46.0 (39.0, 53.2) | 57.3 (52.5, 62.1) |
| Physical Activity               |                   |                   |                   |
| $\geq 150$ Minutes/week         | 44.6 (40.9, 48.3) | 36.5 (31.3, 42.0) | 53.8 (49.6, 57.9) |
| $< 150$ Minutes/week            | 56.2 (51.0, 61.2) | 52.3 (45.6, 59.0) | 60.1 (53.9, 66.1) |
| Fruits & Vegetables Consumption |                   |                   |                   |
| $\geq 5$ servings/day           | 44.7 (36.6, 53.0) | 37.0 (27.4, 47.7) | 62.6 (50.9, 73.0) |
| $< 5$ servings/day              | 49.5 (45.5, 53.4) | 43.2 (38.2, 48.3) | 55.9 (51.4, 60.3) |
| Body Mass Index                 |                   |                   |                   |
| Normal                          | 46.5 (42.2, 50.8) | 38.5 (33.5, 43.9) | 56.3 (50.7, 61.8) |
| Underweight                     | 32.9 (27.3, 39.0) | 30.0 (22.3, 39.1) | 36.6 (29.9, 43.8) |
| Overweight                      | 64.2 (58.9, 69.1) | 60.2 (54.4, 65.7) | 68.0 (59.5, 75.4) |
| Obese                           | 74.8 (64.3, 83.0) | 72.5 (57.7, 83.6) | 76.4 (62.6, 86.3) |

|                               |                   |                   |                   |
|-------------------------------|-------------------|-------------------|-------------------|
| Waist Circumference           |                   |                   |                   |
| Male: <90 cm/ Female: <80 cm  | 41.7 (37.3,46.1)  | 36.6 (31.4,42.1)  | 48.9 (43.4,54.4)  |
| Male: ≥ 90 cm/ Female: ≥80 cm | 67.8 (63.7,71.6)  | 65.4 (58.4,71.8)  | 69.2 (63.0,74.7)  |
| Self-reported diabetes        |                   |                   |                   |
| No                            | 47.5 (43.8, 51.1) | 40.9 (36.0, 46.0) | 54.9 (51.1, 58.7) |
| Yes                           | 64.9 (55.2, 73.5) | 60.5 (49.6, 70.5) | 68.5 (56.2, 78.7) |

<sup>†</sup>Test was done between hypertension (Yes vs. No) and sex (Male vs. Female) for categories of the variables;

\*Never married, widows, divorced and separated

\*\*Hindu, Christian, Buddhist and others

Table 3: Factors associated with hypertension among elderly Bangladeshi people stratified by sex

| Variables                      | Male    |            |             |            | Female  |             |         |            |
|--------------------------------|---------|------------|-------------|------------|---------|-------------|---------|------------|
|                                | COR     | 95% CI     | AOR         | 95% CI     | COR     | 95% CI      | AOR     | 95% CI     |
| <b>Age (in Years)</b>          |         |            |             |            |         |             |         |            |
| 60 to 69                       | Ref     |            | Ref         |            | Ref     |             | Ref     |            |
| 70+                            | 1.42*** | 1.19, 1.68 | 1.37**      | 1.13, 1.66 | 1.39*** | 1.17, 1.66  | 1.40**  | 1.15, 1.70 |
| <b>Place of Residence</b>      |         |            |             |            |         |             |         |            |
| Rural                          | Ref     |            | Ref         |            | Ref     |             | Ref     |            |
| Non-slum urban                 | 1.72*** | 1.38, 2.15 | 0.94        | 0.70, 1.24 | 1.87*** | 1.48, 2.37) | 1.19    | 0.88, 1.60 |
| Slum                           | 0.76    | 0.58, 1.00 | 0.68*       | 0.50, 0.92 | 0.88    | 0.69, 1.13  | 0.88    | 0.67, 1.16 |
| <b>Educational status</b>      |         |            |             |            |         |             |         |            |
| No education                   | Ref     |            | Ref         |            | Ref     |             | Ref     |            |
| Up to 5 <sup>th</sup> grade    | 1.07    | 0.84, 1.37 | 0.93        | 0.72, 1.21 | 1.00    | 0.75, 1.33  | 0.96    | 0.71, 1.30 |
| Up to 10 <sup>th</sup> grade   | 1.62*** | 1.32, 1.98 | 1.28*       | 1.03, 1.60 | 1.71*** | 1.30, 2.25  | 1.29    | 0.96, 1.74 |
| Above 10 <sup>th</sup> grade   | 3.12*** | 2.44, 3.99 | 1.98**<br>* | 1.49, 2.63 | 3.79**  | 1.68, 8.57  | 2.50*   | 1.01, 6.21 |
| <b>Wealth Quintile</b>         |         |            |             |            |         |             |         |            |
| Least wealthy                  | Ref     |            | Ref         |            | Ref     |             | Ref     |            |
| Lower                          | 0.95    | 0.74, 1.23 | 0.96        | 0.74, 1.25 | 1.28    | 0.98, 1.66  | 1.26    | 0.95, 1.65 |
| Middle                         | 1.37*   | 1.07, 1.75 | 1.20        | 0.92, 1.56 | 1.41*   | 1.08, 1.84  | 1.33*   | 1.01, 1.77 |
| Upper                          | 1.23    | 0.96, 1.57 | 0.96        | 0.73, 1.27 | 1.19    | 0.91, 1.55  | 0.95    | 0.71, 1.26 |
| Wealthiest                     | 1.75*** | 1.36, 2.25 | 0.97        | 0.72, 1.32 | 1.66*** | 1.27, 2.16  | 1.06    | 0.77, 1.46 |
| <b>Marital Status</b>          |         |            |             |            |         |             |         |            |
| Currently married              | Ref     |            | Ref         |            | Ref     |             | Ref     |            |
| Others <sup>£</sup>            | 1.37*   | 1.03, 1.82 | 1.16        | 0.85, 1.60 | 1.23*   | 1.02, 1.49  | 1.04    | 0.85, 1.29 |
| <b>Religion</b>                |         |            |             |            |         |             |         |            |
| Muslim                         | Ref     |            | Ref         |            | Ref     |             |         |            |
| Others <sup>££</sup>           | 1.28*   | 1.03, 1.60 | 1.17        | 0.92, 1.48 | 0.99    | 0.79, 1.24  | NA      | NA         |
| <b>Physical Activity</b>       |         |            |             |            |         |             |         |            |
| ≥150 minutes/week              | Ref     |            | Ref         |            | Ref     |             | Ref     |            |
| <150 minutes/week              | 1.95*** | 1.66, 2.29 | 1.53**<br>* | 1.27, 1.83 | 1.72*** | 1.45, 2.03  | 1.40*** | 1.17, 1.69 |
| <b>Fruits &amp; Vegetables</b> |         |            |             |            |         |             |         |            |
| ≥5 servings/day                | Ref     |            | Ref         |            | Ref     |             |         |            |

|                                |         |            |             |            |         |            |         |            |
|--------------------------------|---------|------------|-------------|------------|---------|------------|---------|------------|
| <5 servings/day                | 1.35*   | 1.06, 1.72 | 1.26        | 0.97, 1.63 | 0.98    | 0.68, 1.40 | NA      | NA         |
| <b>Body Mass Index (BMI)</b>   |         |            |             |            |         |            |         |            |
| Normal                         | Ref     |            | Ref         |            | Ref     |            | Ref     |            |
| Underweight                    | 0.62*** | 0.50, 0.77 | NA          | NA         | 0.56*** | 0.45, 0.69 | NA      | NA         |
| Overweight                     | 2.25*** | 1.83, 2.77 | NA          | NA         | 1.69*** | 1.35, 2.12 | NA      | NA         |
| Obese                          | 4.53*** | 2.96, 6.93 | NA          | NA         | 2.99*** | 2.10, 4.25 | NA      | NA         |
| <b>Waist Circumference</b>     |         |            |             |            |         |            |         |            |
| Male: <90 cm/ Female: <80 cm   | Ref     |            | Ref         |            | Ref     |            | Ref     |            |
| Male: ≥ 90 cm/ Female: ≥ 80 cm | 3.39*** | 2.78, 4.14 | 2.81**<br>* | 2.26, 3.49 | 2.46*** | 2.06, 2.94 | 2.21*** | 1.82, 2.67 |
| <b>Self-reported Diabetes</b>  |         |            |             |            |         |            |         |            |
| No                             | Ref     |            | Ref         |            | Ref     |            | Ref     |            |
| Yes                            | 2.22*** | 1.72, 2.88 | 1.40*       | 1.05, 1.87 | 2.45*** | 1.85, 3.23 | 1.83*** | 1.36, 2.46 |

\* p < 0.05, \*\* p < 0.01, \*\*\* p < 0.001; CI: Confidence Interval; COR: Crude Odds Ratio; AOR: Adjusted Odds Ratio;  
 NA: Not applicable, these variables were not included in the adjusted analysis as these were dropped either due to the significance level was >0.2 in the crude analysis or due to high correlation with a covariate.

‡Never married, widows, divorced and separated

££Hindu, Christian, Buddhist and others

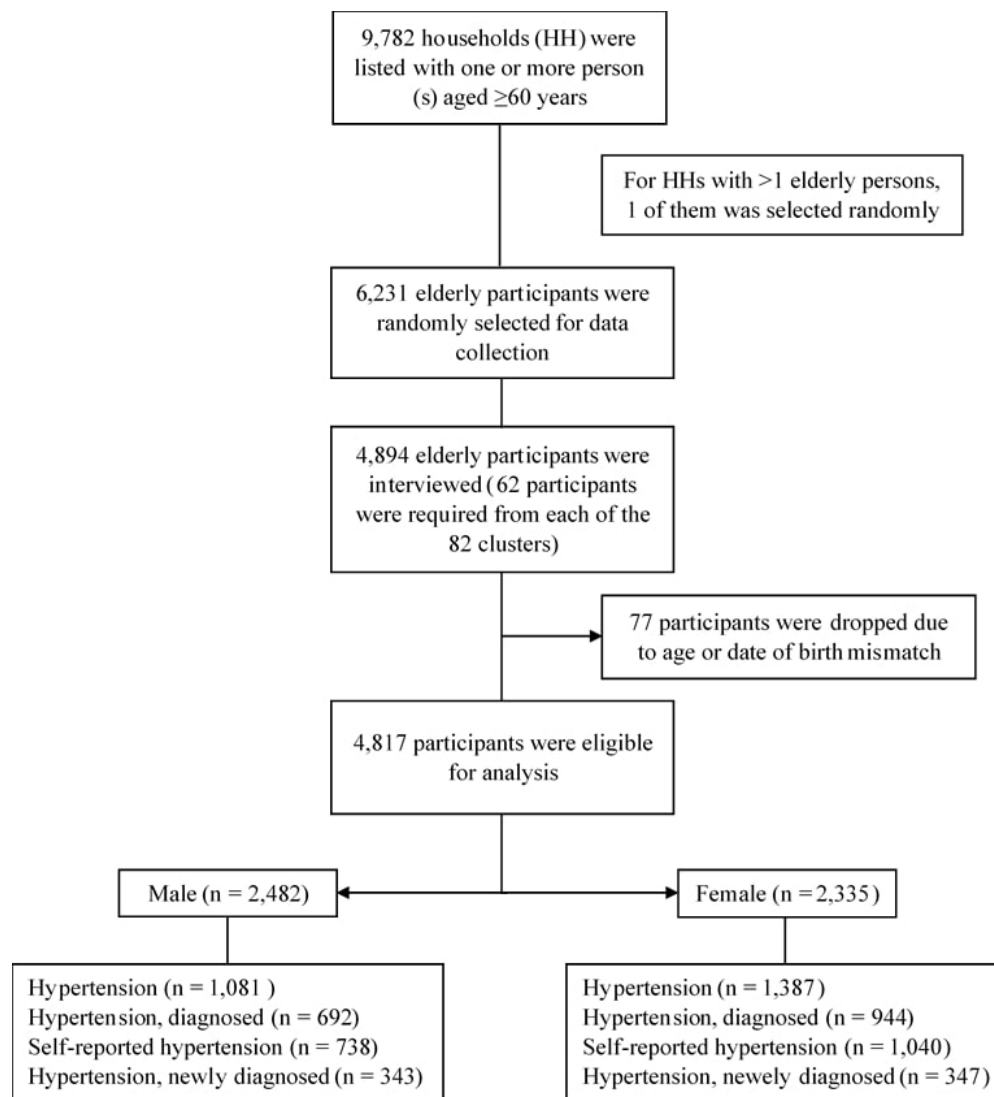

Figure 1: Study flow chart of participants selection (aged  $\geq 60$  years)

65x71mm (300 x 300 DPI)

1  
2  
3  
4  
5  
6  
7  
8  
9  
10  
11  
12  
13  
14  
15  
16  
17  
18  
19  
20  
21  
22  
23  
24  
25  
26  
27  
28  
29  
30  
31  
32  
33  
34  
35  
36  
37  
38  
39  
40  
41  
42  
43  
44  
45  
46  
47  
48  
49  
50  
51  
52  
53  
54  
55  
56  
57  
58  
59  
60

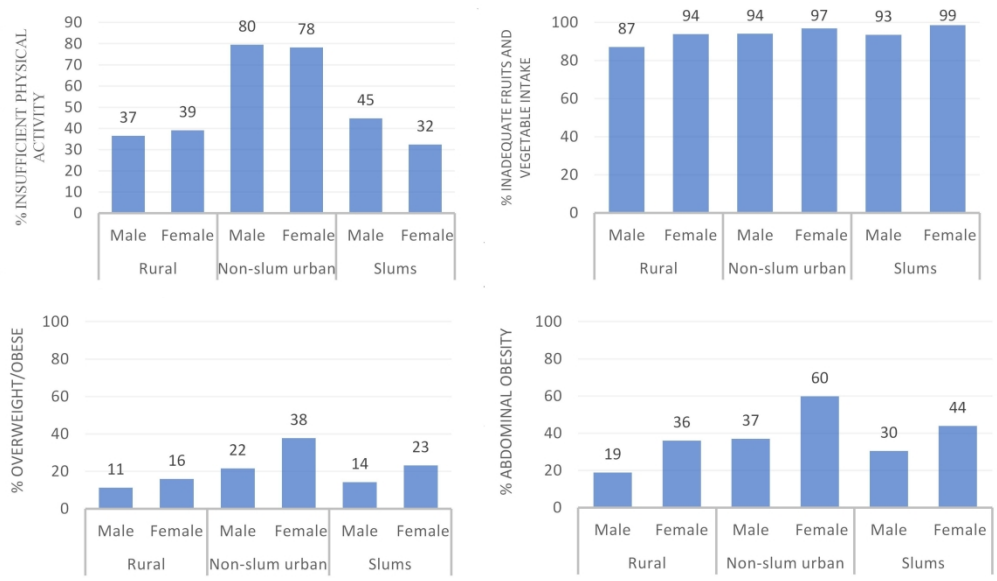

Figure 2: Selected behavioral and clinical characteristics by area of residence and gender

Supplementary table 1: Factors associated with hypertension among elderly Bangladeshi people stratified by sex (adjusted for body mass index instead of waist circumference)

| Variables                      | Male    |            |         |            | Female  |             |         |            |
|--------------------------------|---------|------------|---------|------------|---------|-------------|---------|------------|
|                                | COR     | 95% CI     | AOR     | 95% CI     | COR     | 95% CI      | AOR     | 95% CI     |
| <b>Age (in Years)</b>          |         |            |         |            |         |             |         |            |
| 60 to 69                       | Ref     |            | Ref     |            | Ref     |             | Ref     |            |
| 70+                            | 1.42*** | 1.19, 1.68 | 1.49*** | 1.22, 1.81 | 1.39*** | 1.17, 1.66  | 1.52*** | 1.24, 1.87 |
| <b>Place of Residence</b>      |         |            |         |            |         |             |         |            |
| Rural                          | Ref     |            | Ref     |            | Ref     |             | Ref     |            |
| Non-slum urban                 | 1.72*** | 1.38, 2.15 | 0.91    | 0.68, 1.21 | 1.87*** | 1.48, 2.37) | 1.10    | 0.81, 1.50 |
| Slum                           | 0.76    | 0.58, 1.00 | 0.66**  | 0.48, 0.89 | 0.88    | 0.69, 1.13  | 0.88    | 0.66, 1.16 |
| <b>Educational status</b>      |         |            |         |            |         |             |         |            |
| No education                   | Ref     |            | Ref     |            | Ref     |             | Ref     |            |
| Up to 5 <sup>th</sup> grade    | 1.07    | 0.84, 1.37 | 0.95    | 0.73, 1.24 | 1.00    | 0.75, 1.33  | 0.98    | 0.72, 1.34 |
| Up to 10 <sup>th</sup> grade   | 1.62*** | 1.32, 1.98 | 1.25    | 1.00, 1.56 | 1.71*** | 1.30, 2.25  | 1.29    | 0.95, 1.75 |
| Above 10 <sup>th</sup> grade   | 3.12*** | 2.44, 3.99 | 1.87*** | 1.40, 2.48 | 3.79**  | 1.68, 8.57  | 2.46    | 0.99, 6.14 |
| <b>Wealth Quintile</b>         |         |            |         |            |         |             |         |            |
| Least wealthy                  | Ref     |            | Ref     |            | Ref     |             | Ref     |            |
| Lower                          | 0.95    | 0.74, 1.23 | 0.95    | 0.72, 1.24 | 1.28    | 0.98, 1.66  | 1.30    | 0.98, 1.72 |
| Middle                         | 1.37*   | 1.07, 1.75 | 1.18    | 0.90, 1.54 | 1.41*   | 1.08, 1.84  | 1.36*   | 1.02, 1.81 |
| Upper                          | 1.23    | 0.96, 1.57 | 0.95    | 0.72, 1.25 | 1.19    | 0.91, 1.55  | 0.92    | 0.68, 1.24 |
| Wealthiest                     | 1.75*** | 1.36, 2.25 | 0.97    | 0.71, 1.32 | 1.66*** | 1.27, 2.16  | 1.05    | 0.76, 1.45 |
| <b>Marital Status</b>          |         |            |         |            |         |             |         |            |
| Currently married              | Ref     |            | Ref     |            | Ref     |             | Ref     |            |
| Others <sup>£</sup>            | 1.37*   | 1.03, 1.82 | 1.15    | 0.83, 1.59 | 1.23*   | 1.02, 1.49  | 1.06    | 0.86, 1.32 |
| <b>Religion</b>                |         |            |         |            |         |             |         |            |
| Muslim                         | Ref     |            | Ref     |            | Ref     |             |         |            |
| Others <sup>££</sup>           | 1.28    | 1.03, 1.60 | 1.13    | 0.89, 1.44 | 0.99    | 0.79, 1.24  | NA      | NA         |
| <b>Physical Activity</b>       |         |            |         |            |         |             |         |            |
| ≥150 minutes/week              | Ref     |            | Ref     |            | Ref     |             | Ref     |            |
| <150 minutes/week              | 1.95*** | 1.66, 2.29 | 1.51*** | 1.25, 1.81 | 1.72*** | 1.45, 2.03  | 1.40**  | 1.16, 1.69 |
| <b>Fruits &amp; Vegetables</b> |         |            |         |            |         |             |         |            |
| ≥5 servings/day                | Ref     |            | Ref     |            | Ref     |             |         |            |
| <5 servings/day                | 1.35*   | 1.06, 1.72 | 1.24    | 0.96, 1.62 | 0.98    | 0.68, 1.40  | NA      | NA         |
| <b>Body Mass Index (BMI)</b>   |         |            |         |            |         |             |         |            |
| Normal                         | Ref     |            | Ref     |            | Ref     |             | Ref     |            |
| Underweight                    | 0.62*** | 0.50, 0.77 | 0.61*** | 0.48, 0.76 | 0.56*** | 0.45, 0.69  | 0.53*** | 0.42, 0.66 |
| Overweight                     | 2.25*** | 1.83, 2.77 | 1.97*** | 1.58, 2.46 | 1.69*** | 1.35, 2.12  | 1.60*** | 1.27, 2.02 |
| Obese                          | 4.53*** | 2.96, 6.93 | 3.76*** | 2.41, 5.87 | 2.99*** | 2.10, 4.25  | 2.54*** | 1.76, 3.69 |
| <b>Waist Circumference</b>     |         |            |         |            |         |             |         |            |

|                                  |         |            |      |            |         |            |         |            |
|----------------------------------|---------|------------|------|------------|---------|------------|---------|------------|
| Males <102 cm;<br>Females <88 cm | Ref     |            | Ref  |            | Ref     |            | Ref     |            |
| Males ≥102 cm;<br>Females ≥88 cm | 3.39*** | 2.78, 4.14 | NA   | NA         | 2.46*** | 2.06, 2.94 | \$      | \$         |
| <b>Self-reported Diabetes</b>    |         |            |      |            |         |            |         |            |
| No                               | Ref     |            | Ref  |            | Ref     |            | Ref     |            |
| Yes                              | 2.22*** | 1.72, 2.88 | 1.34 | 1.00, 1.79 | 2.45*** | 1.85, 3.23 | 1.74*** | 1.29, 2.35 |

\* p < 0.05, \*\* p < 0.01, \*\*\* p < 0.001; CI: Confidence Interval; COR: Crude Odds Ratio; AOR: Adjusted Odds Ratio;

NA: Not applicable, these variables were not included in the adjusted analysis as these were dropped due to the significance level was >0.2 in the crude analysis

\$: Although waist circumference was used in the final model, BMI is used here to produce a supplementary table to show to results of the analysis using BMI instead of waist circumference.

‡Never married, widow/widower, divorced and separated

‡‡Hindu, Buddhist, Christian and others



**STROBE 2007 (v4) Statement—Checklist of items that should be included in reports of *cross-sectional studies***

| Section/Topic                | Item # | Recommendation                                                                                                                                                                       | Reported on page # |
|------------------------------|--------|--------------------------------------------------------------------------------------------------------------------------------------------------------------------------------------|--------------------|
| <b>Title and abstract</b>    | 1      | (a) Indicate the study's design with a commonly used term in the title or the abstract                                                                                               | 1                  |
|                              |        | (b) Provide in the abstract an informative and balanced summary of what was done and what was found                                                                                  | 1-2                |
| <b>Introduction</b>          |        |                                                                                                                                                                                      |                    |
| Background/rationale         | 2      | Explain the scientific background and rationale for the investigation being reported                                                                                                 | 3                  |
| Objectives                   | 3      | State specific objectives, including any prespecified hypotheses                                                                                                                     | 3-4                |
| <b>Methods</b>               |        |                                                                                                                                                                                      |                    |
| Study design                 | 4      | Present key elements of study design early in the paper                                                                                                                              | 4                  |
| Setting                      | 5      | Describe the setting, locations, and relevant dates, including periods of recruitment, exposure, follow-up, and data collection                                                      | 4                  |
| Participants                 | 6      | (a) Give the eligibility criteria, and the sources and methods of selection of participants                                                                                          | 4-5                |
| Variables                    | 7      | Clearly define all outcomes, exposures, predictors, potential confounders, and effect modifiers. Give diagnostic criteria, if applicable                                             | 6-7                |
| Data sources/<br>measurement | 8*     | For each variable of interest, give sources of data and details of methods of assessment (measurement). Describe comparability of assessment methods if there is more than one group | 6-7                |
| Bias                         | 9      | Describe any efforts to address potential sources of bias                                                                                                                            | 6-7                |
| Study size                   | 10     | Explain how the study size was arrived at                                                                                                                                            | 4-5                |
| Quantitative variables       | 11     | Explain how quantitative variables were handled in the analyses. If applicable, describe which groupings were chosen and why                                                         | 7                  |
| Statistical methods          | 12     | (a) Describe all statistical methods, including those used to control for confounding                                                                                                | 7                  |
|                              |        | (b) Describe any methods used to examine subgroups and interactions                                                                                                                  | Not applicable     |
|                              |        | (c) Explain how missing data were addressed                                                                                                                                          | Not applicable     |
|                              |        | (d) If applicable, describe analytical methods taking account of sampling strategy                                                                                                   | 7                  |
|                              |        | (e) Describe any sensitivity analyses                                                                                                                                                | Not applicable     |
| <b>Results</b>               |        |                                                                                                                                                                                      |                    |

|                          |     |                                                                                                                                                                                                              |                |
|--------------------------|-----|--------------------------------------------------------------------------------------------------------------------------------------------------------------------------------------------------------------|----------------|
| Participants             | 13* | (a) Report numbers of individuals at each stage of study—eg numbers potentially eligible, examined for eligibility, confirmed eligible, included in the study, completing follow-up, and analysed            | 5              |
|                          |     | (b) Give reasons for non-participation at each stage                                                                                                                                                         | Not applicable |
|                          |     | (c) Consider use of a flow diagram                                                                                                                                                                           | 5              |
| Descriptive data         | 14* | (a) Give characteristics of study participants (eg demographic, clinical, social) and information on exposures and potential confounders                                                                     | 7-8            |
|                          |     | (b) Indicate number of participants with missing data for each variable of interest                                                                                                                          | Not applicable |
| Outcome data             | 15* | Report numbers of outcome events or summary measures                                                                                                                                                         | 7-8            |
| Main results             | 16  | (a) Give unadjusted estimates and, if applicable, confounder-adjusted estimates and their precision (eg, 95% confidence interval). Make clear which confounders were adjusted for and why they were included | 7-9            |
|                          |     | (b) Report category boundaries when continuous variables were categorized                                                                                                                                    | Not applicable |
|                          |     | (c) If relevant, consider translating estimates of relative risk into absolute risk for a meaningful time period                                                                                             | Not applicable |
| Other analyses           | 17  | Report other analyses done—eg analyses of subgroups and interactions, and sensitivity analyses                                                                                                               | Not applicable |
| <b>Discussion</b>        |     |                                                                                                                                                                                                              |                |
| Key results              | 18  | Summarise key results with reference to study objectives                                                                                                                                                     | 8-9            |
| Limitations              | 19  | Discuss limitations of the study, taking into account sources of potential bias or imprecision. Discuss both direction and magnitude of any potential bias                                                   | 12             |
| Interpretation           | 20  | Give a cautious overall interpretation of results considering objectives, limitations, multiplicity of analyses, results from similar studies, and other relevant evidence                                   | 12             |
| Generalisability         | 21  | Discuss the generalisability (external validity) of the study results                                                                                                                                        | 10-12          |
| <b>Other information</b> |     |                                                                                                                                                                                                              |                |
| Funding                  | 22  | Give the source of funding and the role of the funders for the present study and, if applicable, for the original study on which the present article is based                                                | 16             |

\*Give information separately for cases and controls in case-control studies and, if applicable, for exposed and unexposed groups in cohort and cross-sectional studies.

**Note:** An Explanation and Elaboration article discusses each checklist item and gives methodological background and published examples of transparent reporting. The STROBE checklist is best used in conjunction with this article (freely available on the Web sites of PLoS Medicine at <http://www.plosmedicine.org/>, Annals of Internal Medicine at <http://www.annals.org/>, and Epidemiology at <http://www.epidem.com/>). Information on the STROBE Initiative is available at [www.strobe-statement.org](http://www.strobe-statement.org).

# BMJ Open

## Gender-specific prevalence and associated factors of hypertension among elderly Bangladeshi people: findings from a nationally representative cross-sectional survey

|                                 |                                                                                                                                                                                                                                                                                                                                                                                                                                                                                                                                                                                                                                                                                                                                                                                                                                                                                                                                                                                                                                                                                                                                                                                                                                                                                                                                                                        |
|---------------------------------|------------------------------------------------------------------------------------------------------------------------------------------------------------------------------------------------------------------------------------------------------------------------------------------------------------------------------------------------------------------------------------------------------------------------------------------------------------------------------------------------------------------------------------------------------------------------------------------------------------------------------------------------------------------------------------------------------------------------------------------------------------------------------------------------------------------------------------------------------------------------------------------------------------------------------------------------------------------------------------------------------------------------------------------------------------------------------------------------------------------------------------------------------------------------------------------------------------------------------------------------------------------------------------------------------------------------------------------------------------------------|
| Journal:                        | <i>BMJ Open</i>                                                                                                                                                                                                                                                                                                                                                                                                                                                                                                                                                                                                                                                                                                                                                                                                                                                                                                                                                                                                                                                                                                                                                                                                                                                                                                                                                        |
| Manuscript ID                   | bmjopen-2020-038326.R2                                                                                                                                                                                                                                                                                                                                                                                                                                                                                                                                                                                                                                                                                                                                                                                                                                                                                                                                                                                                                                                                                                                                                                                                                                                                                                                                                 |
| Article Type:                   | Original research                                                                                                                                                                                                                                                                                                                                                                                                                                                                                                                                                                                                                                                                                                                                                                                                                                                                                                                                                                                                                                                                                                                                                                                                                                                                                                                                                      |
| Date Submitted by the Author:   | 09-Dec-2020                                                                                                                                                                                                                                                                                                                                                                                                                                                                                                                                                                                                                                                                                                                                                                                                                                                                                                                                                                                                                                                                                                                                                                                                                                                                                                                                                            |
| Complete List of Authors:       | Hanif, Abu Abdullah Mohammad; BRAC James P Grant School of Public Health, BRAC University, Centre for Non-communicable Diseases and Nutrition<br>Shamim, Abu Ahmed; BRAC James P Grant School of Public Health, BRAC University, Centre for Non-communicable Diseases and Nutrition<br>Hossain, Md Mokbul; BRAC James P Grant School of Public Health, BRAC University, Centre for Non-communicable Diseases and Nutrition<br>Hasan, Mehedi; BRAC James P Grant School of Public Health, BRAC University, Centre for Non-communicable Diseases and Nutrition<br>Khan, Md Showkat Ali; BRAC James P Grant School of Public Health, BRAC University, Centre for Non-communicable Diseases and Nutrition<br>Hossaine, Moyazzam; BRAC James P Grant School of Public Health, BRAC University, Centre for Non-communicable Diseases and Nutrition<br>Ullah, Mohammad Aman ; National Nutrition Services (NNS), Institute of Public Health Nutrition (IPHN)<br>Sarker, Samir Kanti ; National Nutrition Services (NNS), Institute of Public Health Nutrition (IPHN)<br>Rahman, S M Mustafizur; National Nutrition Services (NNS), Institute of Public Health Nutrition (IPHN)<br>Mitra, Dipak; North South University, Public Health<br>Mridha, Malay Kanti; BRAC James P Grant School of Public Health, BRAC University, Centre for Non-communicable Diseases and Nutrition |
| <b>Primary Subject Heading</b>: | Epidemiology                                                                                                                                                                                                                                                                                                                                                                                                                                                                                                                                                                                                                                                                                                                                                                                                                                                                                                                                                                                                                                                                                                                                                                                                                                                                                                                                                           |
| Secondary Subject Heading:      | Geriatric medicine, Global health, Public health                                                                                                                                                                                                                                                                                                                                                                                                                                                                                                                                                                                                                                                                                                                                                                                                                                                                                                                                                                                                                                                                                                                                                                                                                                                                                                                       |
| Keywords:                       | Hypertension < CARDIOLOGY, Cardiac Epidemiology < CARDIOLOGY, EPIDEMIOLOGY                                                                                                                                                                                                                                                                                                                                                                                                                                                                                                                                                                                                                                                                                                                                                                                                                                                                                                                                                                                                                                                                                                                                                                                                                                                                                             |
|                                 |                                                                                                                                                                                                                                                                                                                                                                                                                                                                                                                                                                                                                                                                                                                                                                                                                                                                                                                                                                                                                                                                                                                                                                                                                                                                                                                                                                        |

SCHOLARONE™  
Manuscripts



I, the Submitting Author has the right to grant and does grant on behalf of all authors of the Work (as defined in the below author licence), an exclusive licence and/or a non-exclusive licence for contributions from authors who are: i) UK Crown employees; ii) where BMJ has agreed a CC-BY licence shall apply, and/or iii) in accordance with the terms applicable for US Federal Government officers or employees acting as part of their official duties; on a worldwide, perpetual, irrevocable, royalty-free basis to BMJ Publishing Group Ltd ("BMJ") its licensees and where the relevant Journal is co-owned by BMJ to the co-owners of the Journal, to publish the Work in this journal and any other BMJ products and to exploit all rights, as set out in our [licence](#).

The Submitting Author accepts and understands that any supply made under these terms is made by BMJ to the Submitting Author unless you are acting as an employee on behalf of your employer or a postgraduate student of an affiliated institution which is paying any applicable article publishing charge ("APC") for Open Access articles. Where the Submitting Author wishes to make the Work available on an Open Access basis (and intends to pay the relevant APC), the terms of reuse of such Open Access shall be governed by a Creative Commons licence – details of these licences and which [Creative Commons](#) licence will apply to this Work are set out in our licence referred to above.

Other than as permitted in any relevant BMJ Author's Self Archiving Policies, I confirm this Work has not been accepted for publication elsewhere, is not being considered for publication elsewhere and does not duplicate material already published. I confirm all authors consent to publication of this Work and authorise the granting of this licence.

1  
2  
3 **Gender-specific prevalence and associated factors of hypertension among elderly Bangladeshi**  
4 **people: findings from a nationally representative cross-sectional survey**  
5  
6  
7

8  
9 Abu Abdullah Mohammad Hanif<sup>1</sup>, Abu Ahmed Shamim<sup>1</sup>, Md. Mokbul Hossain<sup>1</sup>, Mehedi Hasan<sup>1</sup>, Md  
10 Showkat Ali Khan<sup>1</sup>, Moyazzam Hossaine<sup>1</sup>, Mohammad Aman Ullah<sup>2</sup>, Samir Kanti Sarker<sup>2</sup>, S M  
11 Mustafizur Rahman<sup>2</sup>, Dipak Kumar Mitra<sup>3</sup>, Malay Kanti Mridha<sup>1</sup>  
12  
13  
14  
15

16  
17  
18 <sup>1</sup>Centre for Noncommunicable Diseases and Nutrition, BRAC James P Grant School of Public Health,  
19 BRAC University, Dhaka, Bangladesh

20  
21 <sup>2</sup>National Nutrition Services (NNS), Institute of Public Health Nutrition (IPHN), Bangladesh

22  
23 <sup>3</sup>North-South University, Bangladesh  
24  
25

26 Correspondence to:

27 Malay Kanti Mridha; [malay.mridha@bracu.ac.bd](mailto:malay.mridha@bracu.ac.bd)  
28  
29  
30

## 31 Abstract

32  
33  
34 **Objective:** We aimed to estimate the gender-specific prevalence and associated factors of hypertension  
35 among elderly people in Bangladesh.  
36  
37

38  
39 **Design and method:** We analyzed data from the food security and nutrition surveillance round 2018-  
40 19. The multistage cluster sampling method was used to select the study population. Hypertension was  
41 defined as systolic blood pressure  $\geq 140$  mmHg and/or diastolic blood pressure  $\geq 90$  mmHg and/or  
42 having a history of hypertension. We carried out the descriptive analysis, bivariate and multivariable  
43 logistic regression to report the weighted prevalence of hypertension as well as crude and adjusted odds  
44 ratios with 95% confidence interval. A p-value  $< 0.05$  was considered statistically significant.  
45  
46  
47  
48

49  
50 **Setting:** The study was conducted in 82 clusters (57 rural, 15 non-slum urban, and 10 slums) in all 8  
51 administrative divisions of Bangladesh.  
52  
53

54  
55 **Participants:** A total of 2,482 males and 2,335 females aged  $\geq 60$  years were included in the analysis.  
56  
57

58  
59 **Results:** The weighted prevalence of hypertension was 42% and 56% among males and females,  
60 respectively. The prevalence was higher among females across all sociodemographic, behavioural, and

1  
2  
3 biological strata. Factors associated with higher odds of hypertension [AOR (95%CI)] in both genders  
4 were age 70+ years [1.32 (1.09,1.60) for males and 1.40 (1.15,1.71) for females]; insufficient physical  
5 activity [1.50 (1.25,1.81) and 1.38 (1.15,1.67)]; higher waist circumference [2.76 (2.22,3.43) and 2.20  
6 (1.82,2.67)]; and self-reported diabetes [1.36 (1.02,1.82) and 1.82 (1.35,2.45)]. Additionally, living in  
7 slums decreased [0.71(0.52,0.96)] and education >10 years increased odds of hypertension [1.83  
8 (1.38,2.44)] among males.  
9  
10  
11  
12  
13

14 **Conclusion:** In Bangladesh, half of the elderly were hypertensive, with a higher prevalence in females.  
15 Odds of hypertension was increased by older age ( $\geq 70$  years), education >10 years, insufficient physical  
16 activity, abdominal obesity, and self-reported diabetes. The Ministry of Health of Bangladesh should  
17 consider this while designing and implementing health programs.  
18  
19  
20  
21

22 **Keywords:** Hypertension, elderly people, prevalence, Bangladesh  
23  
24  
25  
26  
27  
28

### 29 **Strengths and limitations of this study**

- 30 • Information on the prevalence, gender-difference, and associated factors of hypertension  
31 among the elderly Bangladeshi population are scarce.
- 32 • The nationally representative design allowed the objective assessment of the prevalence,  
33 gender-difference, and factors of hypertension among the elderly Bangladeshi population.
- 34 • Blood pressure was measured on a single day rather than longitudinal measurements to  
35 confirm the diagnosis of hypertension.
- 36 • The associations might not be causal due to lack of temporality, as the study was a cross-  
37 sectional one.
- 38 • Some strong confounders such as salt consumption, genetic factors could not be addressed.  
39  
40  
41  
42  
43  
44  
45  
46  
47  
48  
49  
50

## 51 **Introduction**

52  
53 The proportion of the ageing population around the world is rapidly increasing, and the pace is faster  
54 than ever. The global population aged  $\geq 60$  years reached 962 million in 2017, more than double  
55 compared to 1980 and is projected to double again by 2050 when it reaches 2.1 billion <sup>1</sup>. In another  
56 estimate, globally, the population aged  $\geq 60$  years will be 22% by the year 2050, and 80% of which will  
57 live in low and middle-income countries <sup>2</sup>. In 2017, 8.8% of the South Asian population was aged  $\geq 60$   
58  
59  
60

1  
2  
3 years, which is projected to be 18.9% by 2050 <sup>1</sup>. Despite its arbitrary nature, persons aged  $\geq 65$  years  
4 are considered as elderly in most of the developed countries <sup>3</sup>. However, in Bangladesh, persons aged  
5  $\geq 60$  years are considered as elderly people considering the shorter longevity <sup>4</sup>. Bangladesh witnessed a  
6 five-fold increase in the elderly population between 1974 and 2001 <sup>5</sup>. According to the Bangladesh  
7 Bureau of Statistics, about 12.5 million (7.5%) of Bangladeshi people were elderly in 2019, which is  
8 expected to be 40 million (20%) by the year 2050 <sup>6</sup>.

13  
14 Hypertension or raised blood pressure is a condition when the pressure of blood flow on the vessel walls  
15 become higher than normal <sup>7</sup>. People often are not aware of whether they are hypertensive or not, and  
16 hence it is often called the “silent killer” <sup>8</sup>. Globally, hypertension is one of the major causes of deaths  
17 and disabilities. According to the World Health Organization Global Health Observatory (GHO) 2016  
18 data, 7.5 million annual deaths were estimated to be caused by high blood pressure, which was about  
19 12.8% of total deaths worldwide. Hypertension is also accounted for 57 million disability-adjusted life  
20 years (DALYs), which amounts to 3.7% of total DALYs <sup>9</sup>. Globally, hypertension is responsible for  
21 45% of deaths from cardiac causes, and 51% of the deaths from stroke <sup>10</sup>. As a risk factor, hypertension  
22 causes nearly 30% of all cardiovascular disease <sup>11</sup>.

23  
24  
25  
26  
27  
28  
29  
30 The prevalence of hypertension substantially increases with age. Evidence from the Framingham heart  
31 study, the longest-standing study on cardiovascular disease epidemiology, showed that more than 90%  
32 of the people who remain normotensive (systolic blood pressure  $< 120$  mmHg and diastolic blood  
33 pressure  $< 80$  mmHg) at the age of 65 years would develop hypertension (systolic blood pressure  $\geq$   
34 140 mmHg and/or diastolic blood pressure  $\geq 90$  mmHg) at their remaining life-span, may be due to age-  
35 related vascular changes <sup>12</sup>. Kibria et al. analyzed data from the Bangladesh Demographic and Health  
36 Survey 2011 (BDHS 2011) and reported that 30% of the males and 52% of the females aged  $\geq 65$  years  
37 were hypertensive, along with 25% of both genders of the same age group were prehypertensive (SBP  
38 120-139 mmHg; DBP 80-89 mmHg)<sup>13</sup>. Another study reported that an estimated 23% of the elderly  
39 people in rural Bangladesh had undiagnosed hypertension (those who had no known hypertension but  
40 found hypertensive upon measurement), and among those who were diagnosed and were receiving  
41 treatment, 68% had uncontrolled hypertension (blood pressure above the normal range despite  
42 antihypertensive treatment) <sup>14</sup>.

43  
44  
45  
46  
47  
48  
49  
50  
51  
52 Despite these facts, hypertension among elderly people in this region could not gain enough attention.  
53 One of the reasons can be limited information due to poor or no screening and control measures for  
54 hypertension among the elderly population. To the best of our knowledge, there is no study reporting  
55 national prevalence and associated risk factors of hypertension among the elderly Bangladeshi  
56 population of 60 years and above. Even some studies have excluded older adults who are at higher risk  
57  
58  
59  
60



of NCDs. Accordingly, the objective of our study is to report the prevalence and factors associated with hypertension among elderly males and females of Bangladesh.

## Materials and Methods

### Study design and site

We conducted a cross-sectional survey among six population groups (children <5 years, adolescent boys, adolescent girls, adult females, adult males, and elderly people). Our objective was to generate nationally and divisionally representative estimates of different nutrition and health-related variables, including major non-communicable diseases in elderly males and females. The data collection period was from October 2018 through October 2019. In this nationally representative study, we enrolled participants from all eight administrative divisions (Barisal, Chattogram, Dhaka, Khulna, Mymensingh, Rajshahi, Rangpur, and Sylhet). We covered rural, non-slum urban and slum areas. We enrolled in study subjects from 82 randomly selected clusters (57 rural, 15 non-slums urban, and 10 slums).

### Sample size and sampling techniques

We determined the sample size to generate nationally, and divisionally representative prevalence for the selected indicators with prevalence ranged from 4% to 98% using a multistage cluster sampling. We considered the type I error,  $\alpha = 0.05$ ; allowable margin of error,  $d = 0.05$  (or  $d = \text{prevalence}/2$  if  $\text{prevalence} \leq 0.1$ ); design effect,  $DEF = 1.61$  and calculated a sample size of 62 elderly individuals from each cluster. Accordingly, the sample size for the elderly population was 5,580 from 90 clusters in the country. Finally, we could complete collecting data from 82 clusters and obtained a sample size of 4,894 elderly people.

Different sampling designs were applied to select the study sites in rural, urban, and slum areas. For the rural area, two districts were first selected from each division in the first stage of four-stage sampling. From each district, two sub-districts (Upazilla) were randomly selected. In the third stage, two unions were randomly chosen from each of the selected sub-districts. The villages/mouzas/geographically demarcated segments with 250-400 households were then identified and mapped. Finally, we randomly selected two of the listed village/mouza/segments from each union as study clusters.

In the urban areas, we used the population proportion of Bangladesh Bureau of Statistics (BBS) 2011 census<sup>15</sup>. We randomly selected 16 wards (1-2 wards/division). We then identified the Mahalla (similar to the villages) with more than 250 households, and the mahallas with >500 households were further sub-divided into smaller geographically demarcated segments of ~250 households. We randomly picked one segment from the listed segments from the selected wards, and that was our study cluster.

1  
2  
3  
4  
5 In the slum areas, the Census of Slum Areas and Floating Population 2014 was used for the selection  
6 of study sites <sup>16</sup>. Slums having  $\geq 300$  households were identified, and those with  $>500$  households were  
7 further divided into smaller segments. Two segments from the Dhaka and Chattogram divisions and  
8 one from each of the other six divisions were randomly selected as study clusters.  
9  
10

11  
12 For each cluster, data collectors first listed all households with individuals aged  $\geq 60$  years. A statistician  
13 then selected 80 households from the list using Simple Random Sampling to enrol 62 elderly people  
14 from a cluster. After selecting the households from a cluster, if there was any household with more than  
15 one person aged  $\geq 60$  years, we randomly selected one of them using the simple random sampling  
16 method. Figure 1 demonstrates how the participants were selected in the study.  
17  
18  
19  
20  
21  
22  
23  
24

25 **Figure 1: Study flow chart of participants selection (aged  $\geq 60$  years)**  
26

## 27 28 Data Collection

29  
30 We collected data using a structured questionnaire, developed initially in English, and then translated  
31 into the local language. Data were collected using face to face interviews and physical measurements  
32 and were directly entered in tablet computers (Samsung Galaxy Tab A7) using a customized  
33 SurveyCTO application <sup>17</sup>. At the end of everyday data collection, data collectors uploaded all the  
34 collected data to the server. We measured the height (using locally made portable stadiometer), weight  
35 (using TANITA UM-070 weighing scale), waist circumference (using measuring tape), and blood  
36 pressure (using Omron HEM 7120) of the elderly people.  
37  
38  
39  
40  
41  
42  
43

44 To collect data on self-reported hypertension, the data collector(s) asked the participant the following  
45 question - "Has a health care provider ever told you that you have high blood pressure, also called  
46 hypertension (other than during pregnancy)?" Before measuring blood pressure, the data collector  
47 ensured that the participant was in a resting condition for at least 15 minutes. There was a three minutes  
48 interval between two subsequent measurements. If there was a gap of  $\geq 10$  mmHg between the first two  
49 measurements of either systolic or diastolic blood pressure or both, a third measurement was taken.  
50  
51  
52  
53

54 Anthropometric measurements were taken based on WHO guidelines, as specified in the Food and  
55 Nutrition Technical Assistance (FANTA) anthropometry manual <sup>18</sup>. The weight was measured to the  
56 nearest 0.1 kg with light cloths, and height was measured to the nearest 0.1 cm in the standing position  
57 with no shoes. Waist circumference was measured to the nearest 0.1 cm at the end of a normal  
58  
59  
60

1  
2  
3 expiration, at the midpoint between the lower part of the last rib and the top of the hipbone, with the  
4 arms relaxed at the sides. Usually, we took two measurements of weight, height, and waist  
5 circumference, and if the gap between the two first measurements were  $>0.1$  kg for weight and  $>0.5$  cm  
6 for height and waist circumference, we took the third measurement.  
7  
8  
9

## 10 Operational definitions

11  
12  
13  
14 The outcome variable in our analysis was the hypertension status of elderly males and females.  
15 Hypertension was defined as systolic blood pressure  $\geq 140$  mmHg, or diastolic blood pressure  $\geq 90$   
16 mmHg or if the participants were told as hypertensive by any trained health care provider (self-  
17 reported)<sup>19</sup>. The variable was made dichotomous either as hypertensive (measured or self-reported)  
18 or as non-hypertensive to facilitate logistic regression.  
19  
20  
21  
22

23 We made a list of potential factors associated with hypertension among elderly people based on  
24 literature review and types of data collected by the survey. The socioeconomic factors were age (60-  
25 69 years vs 70+ years), place of residence (rural, non-slum urban, and slum), education (no formal  
26 education, up to primary level, up to 10 completed years and  $>10$  completed years), wealth status,  
27 marital status (currently married vs never married, divorced, widowed or separated), and religion  
28 (Muslim vs others).  
29  
30  
31  
32

33  
34 The behavioural factors were physical activity, fruits, and vegetable consumption ( $\geq 5$  servings/day vs  
35  $<5$  servings). An elderly person was considered doing sufficient physical activity (during work,  
36 transport, and recreational activities), if he or she reported at least 150 minutes of moderate-intensity  
37 physical activity per week or 75 minutes of heavy physical activity per week or equivalent<sup>20</sup>.  
38  
39  
40  
41

42 Body mass index, waist circumference, and self-reported diabetes were the anthropometric and clinical  
43 factors. We used the Asian cutoff to categorize Body Mass Index (BMI) into underweight ( $<18.5$   
44 kg/m<sup>2</sup>), normal ( $\geq 18.5$  to  $<23.0$  kg/m<sup>2</sup>), overweight ( $\geq 23.0$  to  $<27.5$  kg/m<sup>2</sup>, and obese ( $\geq 27.5$  kg/m<sup>2</sup>)  
45 <sup>21</sup>. Abdominal obesity was defined as the waist circumference of  $\geq 90$  cm in males and  $\geq 80$  cm in  
46 females<sup>22</sup>. For this analysis, we considered the average of the two closest measurements for blood  
47 pressure and all anthropometric variables. Self-reported diabetes was documented if any participant  
48 reported that a trained health care provider ever told him or her that he or she had diabetes.  
49  
50  
51  
52  
53

## 54 Quality Assurance and Control

55  
56  
57 Data collectors and the field supervisors received extensive training on interviews, anthropometric  
58 measurements, and maintenance of data collection instruments and had gone through a rigorous  
59  
60

1  
2  
3 standardization procedure. We field-tested the questionnaire, modified it, and refreshed the data  
4 collectors based on the findings of field testing. To ensure data quality, the field supervisors directly  
5 observed 5% of the interviews and re-interviewed another 5% of the randomly selected participants  
6 within 48 hours of the initial visit. Interim analyses were performed to check the data quality. All the  
7 measuring tools were calibrated routinely.  
8  
9  
10

## 11 12 Statistical Analysis 13 14

15 We performed all the data analysis using Stata 15.1 (Stata Corp, College Station, TX, USA)<sup>23</sup>. All  
16 the background characteristics are reported as categorical variables. We performed principal  
17 component analysis (PCA) to calculate wealth quintiles of the households of the participants. We  
18 estimated the weighted prevalence of hypertension for both elderly males and females. As the males  
19 and females differed by the distribution of risk factors and the prevalence of hypertension, we  
20 conducted separate bivariate and multivariable logistic regression, respectively, to identify the factors  
21 associated with hypertension. The variables with a p-value of  $\leq 0.2$  in the crude analysis were included  
22 in the multivariable logistic regression model<sup>24</sup>. Variance inflation factors (VIFs) were also checked  
23 to assess multi-collinearity among variables. Age, BMI and waist circumference were continuous  
24 variables, and none of them was normally distributed. We converted the continuous variables into  
25 categorical variables and included in the analysis. However, we ran separate regression models  
26 including the age, BMI and waist circumference as continuous variables and provided the results in  
27 **Supplementary Table 1**. We included both BMI and waist circumference separately in our initial  
28 analysis as both are important predictors of hypertension. Finally, we used the waist circumference in  
29 the regression model due to its high correlation with BMI ( $r = 0.87$ ,  $P < 0.001$ ) as well as its program  
30 implications as waist circumference can be easily measured and interpreted for screening in a low  
31 resource setting. We also ran the separate multivariable logistic regression models, including BMI as  
32 an independent variable and provided the results in **Supplementary Table 2**. Crude and adjusted odds  
33 ratios were estimated at 95% Confidence Intervals and the determinants with the p-value  $< 0.05$  were  
34 considered statistically significant.  
35  
36  
37  
38  
39  
40  
41  
42  
43  
44  
45  
46  
47

## 48 Ethical considerations 49 50

51 The FSNSP 2018-19 obtained the ethical approval from the Institutional Review Board (IRB) of the  
52 BRAC James P Grant School of Public Health, BRAC University, Dhaka, Bangladesh (IRB Reference  
53 number: 2018-020-IR). Written informed consent was taken from the respondents before data  
54 collection and measurements.  
55  
56  
57  
58  
59  
60

## Results

**Table 1** describes the characteristics of the study participants. The median (interquartile range) age of the participants was 65.8 (62.4, 71.8) years. The female participants were 48.4%, and the rural area contributed 72.0% of the study subjects. More females (77.1%) were identified without any formal education compared to their male counterparts (48.9%). Only one in every four females and 92% of the males were found married at the time of the survey. Above one-third of the participants from both genders (42% of males and 45% of females) reported insufficient physical activity. Daily fruits and vegetable consumption of 9 out of 10 elderly were <5 servings. About 37% of males and 3% of females reported themselves as current smokers, whereas about 41% of elderly males and 58% of elderly females reported themselves as a current user of smokeless tobacco. A higher proportion (34.4%) of females were overweight or obese than males (28.0%). Abdominal obesity was identified among 23% of males and 41% of females. About 11% of elderly males and 13% of elderly females reported having diabetes.

**Table 1: Background characteristics of the study population by hypertension (no/yes) and gender (male/female)**

**Figure 2** demonstrates the distribution of a few selected behavioural and clinical characteristics across the places of residence and genders. In our study, the prevalence of these risk factors is higher among elderly females compared to their male counterparts except for insufficient physical activity in urban areas. Almost 80% of males and 78% of females of the non-slum urban area reported performing an insufficient physical activity, which is around 40% in both rural and slum areas. Overall, 91% of the elderly were consuming inadequate fruits and vegetables, which was 94% in females and 87% in males. However, above 98% of slum women failed to consume the recommended servings of fruits and vegetables. Overweight/obesity was also highest in urban females, which was about 38% compared to 22% in urban males. Similarly, 60% of urban females were identified with abdominal obesity.

**Figure 2: Selected behavioural and clinical characteristics by area of residence and gender**

**Table 2** shows the prevalence of hypertension according to the characteristics of the participants and how it differs between males and females. In total, more females (56%) were identified as hypertensive than males (42%). Urban elderly females had the highest prevalence of hypertension (63%), whereas the male slum dwellers had the lowest (30%). The wealthiest of the population had the highest prevalence of hypertension in both genders (51% in males and 62% in females). Married elderly males had a lower prevalence of hypertension (41%) compared to those who were not married during the survey (58%). The prevalence of hypertension increased with age, education, body mass index, and waist circumference in both genders. However, the prevalence of hypertension was lower among those who reported sufficient physical activity, and adequate consumption of fruits and vegetables. In contrast, the prevalence of hypertension was found lower among current smokers (35% vs 52%). However, the prevalence of hypertension did not differ much between current users and non-users of smokeless tobacco in this survey.

**Table 2: Prevalence of hypertension according to background characteristics among elderly males and females (weighted) with 95% Confidence Interval (CI)<sup>‡</sup>**

We reported the results of bivariate and multivariable logistic regressions in **Table 3**. In bivariate analysis, we found that all the selected variables were significantly associated with hypertension in males, whereas in females, we found that age, place of residence, education, wealth index, marital status, physical activity, BMI, waist circumference and diabetes were significantly associated with hypertension. However, in multivariable logistic regression analysis, we found that age  $\geq 70$  years [AOR with 95%CI: 1.32 (1.09,1.60) for males and 1.40 (1.15,1.71) for females] compared to 60-69 years; insufficient physical activity [AOR with 95%CI: 1.50 (1.25,1.81) and 1.38 (1.15,1.67)] compared to the recommended amount of physical activity; abdominal obesity [AOR with 95%CI: 2.76 (2.22,3.43) and 2.20 (1.82,2.67)] with reference to no abdominal obesity, i.e. normal waist circumference (Male:  $<90$  cm/ Female:  $<80$  cm); and self-reported diabetes [AOR with 95%CI: 1.36 (1.02,1.82) and 1.82 (1.35,2.45)] compared to no reported diabetes was associated with increased odds of hypertension among both elderly males and females. Additionally, living in slums decreased odds of hypertension [AOR with 95%CI: 0.71 (0.52,0.96)] compared to rural residents and education above 10<sup>th</sup> grade increased odds of hypertension [AOR with 95%CI: 1.83 (1.38,2.44)] compared to no formal education among males. Surprisingly, the elderly males who were reportedly smoker or smokeless tobacco user during data collection were found having decreased odds of hypertension in bivariate logistic regression. The similar effects of smoking persisted even after adjusting with potential confounders in multivariable logistic regression, where, being a current smoker was associated with increased odds of hypertension among elderly males [AOR with 95%CI: 0.74 (0.61,0.89)] compared to those who were currently non-smoker.



**Table 3: Factors associated with hypertension among elderly Bangladeshi people stratified by gender**

## Discussion

In our study, the overall prevalence of hypertension among the elderly people of Bangladesh was 49%, which is similar to the weighted pooled prevalence of hypertension (53%) in Bangladeshi population aged  $\geq 60$  years reported in a 2020 systematic review and meta-analysis<sup>25</sup>. The estimated prevalence is also very close to the south Asian prevalence of hypertension among elderlies aged  $\geq 65$  years (53%) but lower than the average prevalence in the low and middle-income countries (66%) reported in a recent systematic review and meta-analysis<sup>26</sup>. The prevalence is still lower than the prevalence of hypertension in high-income countries. In a systematic analysis, Katherine et al. demonstrated that, in 2010, the prevalence of hypertension among the high-income countries was 60.8% (male: 55.3%; female: 60.9%) and 73.6% (male: 65.6%; female: 77.5%) in the age groups 60-69 years and 70+ years, respectively<sup>27</sup>. However, our reported prevalence is higher than the prevalence previously estimated in Bangladesh demographic and health survey 2011, which was 35% and 40% for the age groups 60-69 and 70+ years, respectively<sup>28</sup>. The increase in the prevalence of hypertension may be due to recent advancements in the economy and infrastructure of the country, leading the people into sedentary lifestyles and stress<sup>29-31</sup>. Hypertension is considered as the most important modifiable risk factor of cardiovascular diseases worldwide<sup>32</sup>. It has been shown that hypertension is responsible for nearly 30% of all cardiovascular diseases, and a person with hypertension has nearly three times the likelihood of having cardiovascular incidents compared to non-hypertensive individuals<sup>11</sup>. As a major contributor to cardiovascular diseases, hypertension causes a major proportion of ischemic heart diseases, heart failure, renal failure, as well as cerebrovascular diseases such as stroke<sup>33</sup>. As almost half of the population in the elderly age group in Bangladesh is hypertensive, we can indisputably assert that Bangladesh must take immediate steps to address this problem. Policymakers need to pay special attention while designing the screening and intervention program considering the health and wellbeing of the elderly people.

After segregating by gender, the prevalence of hypertension was 42% and 56% for males, and females, respectively. This higher prevalence among females is supported by several studies in Bangladesh and elsewhere<sup>34</sup>. It may be due to a lack of ovarian hormones during the postmenopausal period. Studies suggested that ovarian hormones, especially estrogen, may have the potentials to keep the blood pressure lower in premenopausal women, and lack of it may be responsible for elevated blood pressure



1  
2  
3 in postmenopausal women <sup>35</sup>. Moreover, our findings indicate that women, at their advanced age,  
4 become socially more vulnerable to hypertension. For example, three out of four elderly women did  
5 not have a spouse, and it may affect their health care seeking and treatment. The government should  
6 pay additional attention to design customized screening and awareness programs for elderly people  
7 with particular attention to the vulnerability of women.  
8  
9  
10

11  
12 Our study corroborated the fact that the odds of developing hypertension increases with age in both  
13 genders. Studies conducted in Bangladesh <sup>13</sup>, India <sup>36</sup>, Pakistan <sup>37</sup>, Nepal <sup>38</sup>, Indonesia <sup>39</sup>, and China <sup>40</sup>,  
14 have shown that the older age group had a higher prevalence of hypertension. The biological effect of  
15 the increased arterial resistance due to age-related changes in the arterial wall, i.e., thickening of the  
16 arterial wall in old ages, may contribute to high-risk of hypertension in older ages <sup>41</sup>. Bangladesh is in  
17 the midst of a huge demographic transition, and with the decreasing trend of birth and death rate, the  
18 proportion of the elderly population is growing, which will eventually add more hypertensive patients  
19 and create more pressure on the already over-burdened health system of the country. In this study,  
20 insufficient physical activity increased the odds of having hypertension in both genders. Elderlies, who  
21 reported less than 150 minutes of moderate-intensity or equivalent physical activity per week, had  
22 around 1.5 times more odds of having hypertension compared to those with 150 minutes or more such  
23 physical activity. This finding is supported by numerous studies <sup>13 38 42</sup>. Besides, physical inactivity  
24 was also found associated directly with stroke and ischemic heart diseases <sup>43</sup>. Elderly males and  
25 females with higher waist circumference had three times and two times more odds of having  
26 hypertension, respectively, with refer to those with lower or normal waist circumference. Several  
27 studies have reported that waist circumference, as it represents abdominal obesity, is a better predictor  
28 of hypertension compared to BMI <sup>44 45</sup>.  
29  
30  
31  
32  
33  
34  
35  
36  
37  
38  
39  
40

41 In this study, smoking use was found inversely associated with hypertension for both males and  
42 females. These findings are contrary to the existing evidence that smoking causes adverse  
43 cardiovascular events and increases the risk of coronary heart diseases in a combined role with  
44 hypertension and dyslipidemia <sup>46</sup>. This finding may be due to the reverse causation because the  
45 participants might have given up the habit of smoking due to known hypertension status, and we  
46 collected the data only on current smoking status. At least one study suggested that to see the proper  
47 effects of smoking on hypertension, smoking data should be collected in a life-course approach as the  
48 effects of smoking may not appear immediately after starting or quitting smoking <sup>47</sup>. In our analysis,  
49 fruits and vegetable consumption was not found significantly associated with hypertension in both  
50 genders. In the case of hypertension, fruit and vegetable consumption usually helps with increased  
51 potassium intake. But in Bangladesh, improper processing, such as washing after cutting or over-  
52 cooking, may reduce the amount of potassium <sup>48 49</sup>. Also, not all fruits and vegetables have a high level  
53 of potassium. However, this should be studied further to explore the causal pathway between  
54  
55  
56  
57  
58  
59  
60

1  
2  
3 hypertension and fruits & vegetables.  
4  
5

6 Among other factors, a higher level of education was responsible for the increased odds of having  
7 hypertension. Elderly males and females with more than ten years of education had about two times  
8 higher odds of having hypertension compared to those without any formal education. Kibria et al.  
9 found similar results analyzing the data from the Bangladesh Demographic and Health Survey 2011  
10<sup>13</sup>. Education levels may elevate wealth status, which makes the people used to a sedentary lifestyle,  
11 and eventually may increase the odds of hypertension<sup>50</sup>. However, the wealth index did not show any  
12 such clear pattern, although elderlies in the upper wealth quintiles had a relatively higher prevalence  
13 of hypertension [Table 2]. In this study, living in slums was associated with lower odds of hypertension  
14 though it was not statistically significant in the case of the females. Self-reported diabetes was also  
15 increased odds of having hypertension in both males and females in this age group of the population,  
16 which is supported by several studies in Bangladesh and elsewhere<sup>51-53</sup>.  
17  
18  
19  
20  
21  
22  
23  
24  
25  
26

## 27 Recommendations

28 Risk factors such as insufficient physical activity and obesity are mostly modifiable by appropriate  
29 education and control programs with support from the health and other sectors of the government. The  
30 early diagnosis of hypertension and other health problems is critical for controlling hypertension and  
31 the prevention of hypertension-related complications. However, the gender difference in the prevalence  
32 of and factors associated with hypertension indicated that a universal prevention and control strategy  
33 might not work in this age group of population. Instead, the government should design a specific  
34 screening and control program to reduce the number of cases by early diagnosis and control and  
35 eventually minimize further complications of hypertension. Besides, education programs should  
36 immediately be initiated to raise awareness among the elderly males and females as well as their family  
37 members on healthy lifestyles. The introduction of geriatric health care with the general health care  
38 system at the primary health care level can be a crucial step in improving the overall health of elderly  
39 people.  
40  
41  
42  
43  
44  
45  
46  
47  
48  
49

## 50 Strengths and limitations

51 Prevalence of hypertension among elderly people was reported in several studies in Bangladesh.  
52 However, to the best of our knowledge, this is the first-ever nationally representative survey in  
53 Bangladesh investigating the prevalence and associated factors of hypertension among the elderly  
54 people. The limitations of the study include sampling challenges at the field level. The data collectors  
55 faced higher refusal rates in wealthier non-slum urban areas and a few isolated rural communities.  
56  
57  
58  
59  
60

Besides, seven selected rural clusters were dropped from the survey due to administrative and financial constraints, which may affect the national representativeness in the study. Among other limitations, blood pressure measurements were taken on a single day rather than longitudinal measurements on different days to confirm the diagnosis of hypertension. Also, the associations we have found in our study might not be causal due to lack of temporality, as the study was a cross-sectional one. Besides, we could not adjust for some strong confounders, such as salt consumption, genetic factors<sup>54 55</sup>. However, these limitations emphasize the importance of further research on the determinants of hypertension among the elderly people of Bangladesh. We also recommend studying the gender difference in the physiology and pathophysiology of hypertension by exploring the effects of gonadal hormones and gender chromosomes on blood pressure to yield customized management of hypertension separately for both males and females.

## Conclusions

As per the findings of our study, about half of the Bangladeshi elderlies were hypertensive, and hypertension was more prevalent among elderly females in terms of sociodemographic, behavioural, and biological characteristics. Extreme old age ( $\geq 70$  years), education above 10th grade, insufficient physical activity, abdominal obesity (higher waist circumference), and self-reported diabetes was associated with increased odds of hypertension in Bangladeshi elderly population. Additionally, living in slums had lower odds of hypertension among elderly males. The government of Bangladesh should take a multisectoral approach involving health, economic, education, and social welfare sectors to promote healthy lifestyles among the elderly people and their families and provide emphasis on early diagnosis and treatment to prevent complications of hypertension among the elderly population.

## References

1. United Nations DoEaSA, Population Division. World population ageing, 2017 highlights (ST/ESA/SER.A/397)2017.
2. World Health Organization. Ageing and health 2018, February 5 [Available from: <https://www.who.int/news-room/fact-sheets/detail/ageing-and-health> accessed February 9, 2020.
3. World Health Organization. WHO | Proposed working definition of an older person in Africa for the MDS Project. *WHO* 2002
4. Rahman KMM. Unnayan Onneshan Policy Brief on Present Social Context and Elderly Population in Bangladesh.13.
5. Barikdar A, Ahmed T, Lasker SP. The Situation of the Elderly in Bangladesh. *Bangladesh J Bioethics* 2016;7(1):27-36. doi: 10.3329/bioethics.v7i1.29303
6. Jahangir AR. Bangladesh faces a challenge to ensure welfare of its aging population | Inter Press Service. 2019.
7. World Health Organization. Hypertension 2020 [Available from: <https://www.who.int/health-topics/hypertension/> accessed February 9, 2020.
8. World Health Organization. Q&As on hypertension [updated 2015, September. Available from: <https://www.who.int/features/qa/82/en/> accessed February 9, 2020.

- 1
  - 2
  - 3
  - 4
  - 5
  - 6
  - 7
  - 8
  - 9
  - 10
  - 11
  - 12
  - 13
  - 14
  - 15
  - 16
  - 17
  - 18
  - 19
  - 20
  - 21
  - 22
  - 23
  - 24
  - 25
  - 26
  - 27
  - 28
  - 29
  - 30
  - 31
  - 32
  - 33
  - 34
  - 35
  - 36
  - 37
  - 38
  - 39
  - 40
  - 41
  - 42
  - 43
  - 44
  - 45
  - 46
  - 47
  - 48
  - 49
  - 50
  - 51
  - 52
  - 53
  - 54
  - 55
  - 56
  - 57
  - 58
  - 59
  - 60
9. World Health Organization. Raised blood pressure: Situation and trends 2020 [Available from: [https://www.who.int/gho/ncd/risk\\_factors/blood\\_pressure\\_prevalence\\_text/en/](https://www.who.int/gho/ncd/risk_factors/blood_pressure_prevalence_text/en/) accessed February 10 2020.
10. World Health Organization. Global health risks: mortality and burden of disease attributable to selected major risks. Geneva, Switzerland, 2009:62.
11. Khanam F, Hossain MB, Mistry SK, et al. Prevalence and Risk Factors of Cardiovascular Diseases among Bangladeshi Adults: Findings from a Cross-sectional Study. *J Epidemiol Glob Health* 2019;9(3):176-84. doi: 10.2991/jegh.k.190531.001 [published Online First: 2019/09/19]
12. Mosley WJ, Lloyd-Jones DM. Epidemiology of Hypertension in the Elderly. *Clinics in Geriatric Medicine* 2009;25(2):179-89 %U <https://linkinghub.elsevier.com/retrieve/pii/S0749069009000032>.
13. Al Kibria GM, Burrowes V, Choudhury A, et al. Gender differences in prevalence and associated factors of prehypertension and hypertension among Bangladeshi adults. *International Journal of Cardiology Hypertension* 2019;1:100006 %U <http://www.sciencedirect.com/science/article/pii/S2590086219300060>.
14. Khanam MA, Lindeboom W, Razzaque A, et al. Undiagnosed and uncontrolled hypertension among the adults in rural Bangladesh: findings from a community-based study. *Journal of hypertension* 2015;33(12):2399-406. doi: 10.1097/HJH.0000000000000712
15. Bangladesh Bureau of Statistics (BBS). Population & Housing Census: Preliminary Results, 2011.
16. Bangladesh Bureau of Statistics (BBS). Census of Slum Areas and Floating Population 2014 2015.
17. Dobility Inc. %U <https://www.surveyccto.com> [program].
18. Cogill B. Anthropometric Indicators Measurement Guide, 2003.
19. Rocella J. THE SEVENTH REPORT OF THE JOINT NATIONAL COMMITTEE ON PREVENTION, DETECTION, EVALUATION, AND TREATMENT OF HIGH BLOOD PRESSURE. THE JNC 7 REPORT. 2003:3.
20. World Health O. Global recommendations on physical activity for health. %@ 978-92-4-159997-9 %U <http://www.ncbi.nlm.nih.gov/books/NBK3050572010>.
21. W. H. O. Expert Consultation. Appropriate body-mass index for Asian populations and its implications for policy and intervention strategies. *Lancet* 2004;363(9403):157-63. doi: 10.1016/S0140-6736(03)15268-3 [published Online First: 2004/01/17]
22. Misra A, Vikram NK, Gupta R, et al. Waist circumference cutoff points and action levels for Asian Indians for identification of abdominal obesity. *Int J Obes (Lond)* 2006;30(1):106-11. doi: 10.1038/sj.ijo.0803111 [published Online First: 2005/09/29]
23. StataCorp. Stata Statistical Software: Release 15. College Station, TX: StataCorp LLC 2017
24. Maldonado G, Greenland S. Simulation study of confounder-selection strategies. *American journal of epidemiology* 1993;138(11):923-36 @ 1476-6256.
25. Chowdhury MZI, Rahman M, Akter T, et al. Hypertension prevalence and its trend in Bangladesh: evidence from a systematic review and meta-analysis. *Clin Hypertens* 2020;26:10. doi: 10.1186/s40885-020-00143-1 [published Online First: 2020/06/10]
26. Sarki AM, Nduka CU, Stranges S, et al. Prevalence of Hypertension in Low- and Middle-Income Countries: A Systematic Review and Meta-Analysis. *Medicine* 2015;94(50):e1959 %U [https://journals.lww.com/md-journal/FullText/2015/12150/Prevalence\\_of\\_Hypertension\\_in\\_Low\\_\\_and.5.aspx](https://journals.lww.com/md-journal/FullText/2015/12150/Prevalence_of_Hypertension_in_Low__and.5.aspx).
27. Mills KT, Bundy JD, Kelly TN, et al. Global Disparities of Hypertension Prevalence and Control: A Systematic Analysis of Population-based Studies from 90 Countries. *Circulation* 2016;134(6):441-50 %U <https://www.ncbi.nlm.nih.gov/pmc/articles/PMC4979614/>.
28. Rahman MM, Gilmour S, Akter S, et al. Prevalence and control of hypertension in Bangladesh: a multilevel analysis of a nationwide population-based survey. *J Hypertens*

- 2015;33(3):465-72; discussion 72. doi: 10.1097/HJH.0000000000000421 [published Online First: 2014/11/08]
29. Atkinson K, Lowe S, Moore S. Human development, occupational structure and physical inactivity among 47 low and middle income countries. *Preventive Medicine Reports* 2016;3:40-45. doi: 10.1016/j.pmedr.2015.11.009
30. Martin SL, Kirkner GJ, Mayo K, et al. Urban, rural, and regional variations in physical activity. *J Rural Health* 2005;21(3):239-44. doi: 10.1111/j.1748-0361.2005.tb00089.x
31. Bishwajit G, Ide S, Hossain MA, et al. Trade Liberalization, Urbanization and Nutrition Transition in Asian Countries. *Journal of Nutritional Health & Food Science* 2014;2(1) doi: 10.15226/jnhfs.2014.00109
32. Collaborators GBDRF. Global, regional, and national comparative risk assessment of 84 behavioural, environmental and occupational, and metabolic risks or clusters of risks for 195 countries and territories, 1990-2017: a systematic analysis for the Global Burden of Disease Study 2017. *Lancet* 2018;392(10159):1923-94. doi: 10.1016/S0140-6736(18)32225-6 [published Online First: 2018/11/30]
33. Lionakis N, Mendrinos D, Sanidas E, et al. Hypertension in the elderly. *World Journal of Cardiology* 2012;4(5):135-47 %U <https://www.ncbi.nlm.nih.gov/pmc/articles/PMC3364500/>.
34. Rahman M, Zaman MM, Islam JY, et al. Prevalence, treatment patterns, and risk factors of hypertension and pre-hypertension among Bangladeshi adults. *J Hum Hypertens* 2018;32(5):334-48. doi: 10.1038/s41371-017-0018-x [published Online First: 2017/12/13]
35. Dubey RK, Oparil S, Imthurn B, et al. Gender hormones and hypertension. *Cardiovascular Research* 2002;53(3):688-708. doi: 10.1016/s0008-6363(01)00527-2
36. Bhise MD, Patra S. Prevalence and correlates of hypertension in Maharashtra, India: A multilevel analysis. *PLoS One* 2018;13(2):e0191948. doi: 10.1371/journal.pone.0191948 [published Online First: 2018/02/06]
37. Basit A, Tanveer S, Fawwad A, et al. Prevalence and contributing risk factors for hypertension in urban and rural areas of Pakistan; a study from second National Diabetes Survey of Pakistan (NDSP) 2016-2017. *Clin Exp Hypertens* 2020;42(3):218-24. doi: 10.1080/10641963.2019.1619753 [published Online First: 2019/06/04]
38. Hasan M, Sutradhar I, Akter T, et al. Prevalence and determinants of hypertension among adult population in Nepal: Data from Nepal Demographic and Health Survey 2016. *PLOS ONE* 2018;13(5):e0198028 %U <https://journals.plos.org/plosone/article?id=10.1371/journal.pone.28>.
39. Peltzer K, Pengpid S. The Prevalence and Social Determinants of Hypertension among Adults in Indonesia: A Cross-Sectional Population-Based National Survey. *International Journal of Hypertension*, 2018.
40. Song H, Feng D, Wang R, et al. The urban-rural disparity in the prevalence and risk factors of hypertension among the elderly in China-a cross-sectional study. *PeerJ* 2019;7:e8015. doi: 10.7717/peerj.8015 [published Online First: 2019/12/19]
41. Shukuri A, Tewelde T, Shaweno T. Prevalence of old age hypertension and associated factors among older adults in rural Ethiopia. <https://www.dovepress.com/prevalence-of-old-age-hypertension-and-associated-factors-among-older-peer-reviewed-fulltext-article-IBPC>. *Integrated Blood Pressure Control*, 2019.
42. Hypertension Study G. Prevalence, awareness, treatment and control of hypertension among the elderly in Bangladesh and India: a multicentre study. *Bulletin of the World Health Organization* 2001;79(6):490-500.
43. Lawes CM, Vander Hoorn S, Rodgers A, et al. Global burden of blood-pressure-related disease, 2001. *Lancet* 2008;371(9623):1513-8. doi: 10.1016/S0140-6736(08)60655-8 [published Online First: 2008/05/06]



- 1  
2  
3  
4  
5  
6  
7  
8  
9  
10  
11  
12  
13  
14  
15  
16  
17  
18  
19  
20  
21  
22  
23  
24  
25  
26  
27  
28  
29  
30  
31  
32  
33  
34  
35  
36  
37  
38  
39  
40  
41  
42  
43  
44
44. Hirani V, Zaninotto P, Primatesta P. Generalised and abdominal obesity and risk of diabetes, hypertension and hypertension-diabetes co-morbidity in England. *Public Health Nutr* 2008;11(5):521-7. doi: 10.1017/S1368980007000845 [published Online First: 2007/09/05]
  45. Yalcin BM, Sahin EM, Yalcin E. Which anthropometric measurements is most closely related to elevated blood pressure? *Family Practice* 2005;22(5):541-47. doi: 10.1093/fampra/cmi043
  46. Primatesta P, Falaschetti E, Gupta S, et al. Association between smoking and blood pressure: evidence from the health survey for England. *Hypertension* 2001;37(2):187-93.
  47. Gao K, Shi X, Wang W. The life-course impact of smoking on hypertension, myocardial infarction and respiratory diseases. *Scientific Reports* 2017;7 %U <https://www.ncbi.nlm.nih.gov/pmc/articles/PMC5489535/>
  48. Martínez-Pineda M, Yagüe-Ruiz C, Caverni-Muñoz A, et al. Reduction of potassium content of green bean pods and chard by culinary processing. Tools for chronic kidney disease. *Nefrología (English Edition)* 2016;36(4):427-32. doi: 10.1016/j.nefro.2016.03.009
  49. Noubiap JJN, Bigna JJR, Nansseu JRN. Low Sodium and High Potassium Intake for Cardiovascular Prevention: Evidence Revisited With Emphasis on Challenges in Sub-Saharan Africa. *The Journal of Clinical Hypertension* 2015;17(1):81-83. doi: 10.1111/jch.12439
  50. Yabiku ST, Schlabach S. Social Change and the Relationships Between Education and Employment. *Population Research and Policy Review* 2009;28(4):533-49. doi: 10.1007/s11113-008-9117-2
  51. Chowdhury MA, Uddin MJ, Haque MR, et al. Hypertension among adults in Bangladesh: evidence from a national cross-sectional survey. *BMC cardiovascular disorders* 2016;16:22. doi: 10.1186/s12872-016-0197-3
  52. Craig LS, Gage AJ, Thomas AM. Prevalence and predictors of hypertension in Namibia: A national-level cross-sectional study. *PLOS ONE* 2018;13(9):e0204344. doi: 10.1371/journal.pone.0204344
  53. Da-Mata FAF, Galvao TF, Pereira MG, et al. Prevalence of Self-Reported Diabetes and Its Associated Factors: A Population-Based Study in Brazil. *Int J Endocrinol* 2015;2015 doi: 10.1155/2015/610790
  54. Everett B, Zajacova A. Gender Differences in Hypertension and Hypertension Awareness Among Young Adults. *Biodemography and social biology* 2015;61(1):1-17 %U <https://www.ncbi.nlm.nih.gov/pmc/articles/PMC4896734/>.
  55. Ha SK. Dietary salt intake and hypertension. *Electrolyte Blood Press* 2014;12(1):7-18. doi: 10.5049/EBP.2014.12.1.7 [published Online First: 2014/07/26]

45  
46  
47  
48  
49  
50  
51  
52

**Contributors** AAMH conceptualized and conducted the data analysis and drafted the initial manuscript. AAS, MH, MMH, MSAK, MHe, MAU, SKS, SMMR, DKM were involved in the conceptualization and design of the study as well as reviewed and approved the final version of the manuscript. MKM led the conceptualization/design of the survey and supervision of data collection, critically reviewed the manuscript, and approved the final version of the manuscript.

53  
54  
55  
56

**Acknowledgement** We are thankful to all the study participants, data collectors, field supervisors, and managers of the national nutrition surveillance round 2018-19.

57  
58  
59  
60

**Funding** The study was funded by the National Nutrition Services (NNS), Institute of Public Health Nutrition, Ministry of Health and Family Welfare, Government of Bangladesh (Memo: 45.165.032.01.00.003.2016-325; Date: 10-12-2017)

**Patient and public involvement** No patients or public were directly involved in conceptualization, design, data collection, or dissemination of this study. However, the data collection supervisors explained the study procedure and purpose to the local leaders to receive community consent.

**Competing interests** None declared.

**Patient consent for publication** Not applicable.

**Ethics approval** The study obtained ethical approval from the Institutional Review Board (IRB) of the BRAC James P Grant School of Public Health, BRAC University, Dhaka, Bangladesh

**Provenance and peer review** Not commissioned, externally peer-reviewed

**Data availability statement** Data may be available upon reasonable request. All such requests can be sent to Prof. Syed Masud Ahmed, IRB Chair, BRAC James P Grant School of Public Health, BRAC University, Dhaka, Bangladesh to the email address: ahmed.sm@bracu.ac.bd

**Table 1: Background characteristics of the study population by hypertension (no/yes) and gender (male/female)**

| Variables            | Overall          | Hypertension     |                  | Gender           |                  |
|----------------------|------------------|------------------|------------------|------------------|------------------|
|                      |                  | No               | Yes              | Male             | Female           |
|                      | N=4,813          | N=2,345          | N=2,468          | N=2,482          | N=2,335          |
|                      | n(%)*            | n(%)*            | n(%)*            | n(%)*            | n(%)*            |
| Gender               |                  |                  |                  |                  |                  |
| Male                 | 2,482 (51.6)     | 1,401 (59.7)     | 1,081 (43.8)     | --               | --               |
| Female               | 2,331 (48.4)     | 944 (40.3)       | 1,387 (56.2)     | --               | --               |
| Age (years)\$        | 65.8 (62.4-71.8) | 65.3 (62.1-70.8) | 66.6 (62.8-73.3) | 65.7 (62.6-71.4) | 66.0 (62.3-72.9) |
| Age Group (in Years) |                  |                  |                  |                  |                  |
| 60 to 69 years       | 3,223 (67.0)     | 1,668 (71.1)     | 1,555 (63.0)     | 1,725 (69.5)     | 1,500 (64.3)     |
| 70 years and above   | 1,589 (33.0)     | 677 (28.9)       | 912 (37.0)       | 757 (30.5)       | 834 (35.7)       |
| Place of Residence   |                  |                  |                  |                  |                  |
| Rural                | 3,463 (72.0)     | 1,757 (74.9)     | 1,706 (69.1)     | 1,835 (73.9)     | 1,628 (69.7)     |
| Non-slum urban       | 806 (16.7)       | 292 (12.5)       | 514 (20.8)       | 394 (15.9)       | 413 (17.7)       |
| Slum                 | 544 (11.3)       | 296 (12.6)       | 248 (10.0)       | 253 (10.2)       | 294 (12.6)       |
| Educational status   |                  |                  |                  |                  |                  |
| No education         | 3,012 (62.6)     | 1,532 (65.3)     | 1,480 (60.0)     | 1,214 (48.9)     | 1,800 (77.1)     |
| Up to 5th grade      | 556 (11.6)       | 302 (12.9)       | 254 (10.3)       | 342 (13.8)       | 216 (9.3)        |
| Up to 10th grade     | 843 (17.5)       | 376 (16.0)       | 467 (18.9)       | 567 (22.8)       | 276 (11.8)       |
| Above 10th grade     | 402 (8.4)        | 135 (5.8)        | 267 (10.8)       | 359 (14.5)       | 43 (1.8)         |
| Wealth Quintile      |                  |                  |                  |                  |                  |



|                                  |                  |                  |                  |                  |                  |
|----------------------------------|------------------|------------------|------------------|------------------|------------------|
| Least wealthy (Q1)               | 966 (20.1)       | 531 (22.7)       | 435 (17.6)       | 543 (21.9)       | 423 (18.1)       |
| Lower (Q2)                       | 968 (20.1)       | 500 (21.3)       | 468 (19.0)       | 485 (19.5)       | 484 (20.7)       |
| Middle (Q3)                      | 962 (20.0)       | 445 (19.0)       | 517 (20.9)       | 494 (19.9)       | 469 (20.1)       |
| Upper (Q4)                       | 957 (19.9)       | 475 (20.3)       | 482 (19.5)       | 491 (19.8)       | 467 (20.0)       |
| Wealthiest (Q5)                  | 959 (19.9)       | 393 (16.8)       | 566 (22.9)       | 469 (18.9)       | 491 (21.0)       |
| Marital Status                   |                  |                  |                  |                  |                  |
| Currently married                | 2,860 (59.4)     | 1,558 (66.4)     | 1,302 (52.8)     | 2,277 (91.7)     | 584 (25.0)       |
| Others**                         | 1,953 (40.6)     | 787 (33.6)       | 1,166 (47.2)     | 205 (8.3)        | 1,751 (75.0)     |
| Religion                         |                  |                  |                  |                  |                  |
| Muslim                           | 4,073 (84.6)     | 2,005 (85.5)     | 2,068 (83.8)     | 2,113 (85.1)     | 1,962 (84.0)     |
| Others***                        | 740 (15.4)       | 340 (14.5)       | 400 (16.2)       | 369 (14.9)       | 373 (16.0)       |
| Physical Activity                |                  |                  |                  |                  |                  |
| >=150 Minutes/week               | 2,706 (56.2)     | 1,498 (63.9)     | 1,208 (48.9)     | 1,433 (57.7)     | 1,274 (54.6)     |
| <150 Minutes/week                | 2,107 (43.8)     | 847 (36.1)       | 1,260 (51.1)     | 1,049 (42.3)     | 1,061 (45.4)     |
| Fruits & Vegetables Consumption  |                  |                  |                  |                  |                  |
| >=5 servings/day                 | 450 (9.3)        | 253 (10.8)       | 197 (8.0)        | 320 (12.9)       | 130 (5.6)        |
| <5 servings/day                  | 4,363 (90.7)     | 2,092 (89.2)     | 2,271 (92.0)     | 2,162 (87.1)     | 2,205 (94.4)     |
| Currently smoking                |                  |                  |                  |                  |                  |
| No                               | 3,828 (79.5)     | 1,708 (72.8)     | 2,116 (85.7)     | 1,564 (63.0)     | 2,264 (97.0)     |
| Yes                              | 989 (20.5)       | 637 (27.2)       | 352 (14.3)       | 918 (37.0)       | 71 (3.0)         |
| Smokeless tobacco use            |                  |                  |                  |                  |                  |
| No                               | 2,438 (50.6)     | 1,146 (48.9)     | 1,290 (52.3)     | 1,455 (58.6)     | 983 (42.1)       |
| Yes                              | 2,379 (49.4)     | 1,199 (51.1)     | 1,178 (47.7)     | 1,027 (41.4)     | 1,352 (57.9)     |
| Body Mass Index (BMI)\$          | 20.9 (18.6-23.8) | 19.9 (18.0-22.3) | 22.1 (19.6-24.9) | 20.7 (18.6-23.5) | 21.2 (18.7-24.3) |
| BMI Category (Asian)             |                  |                  |                  |                  |                  |
| Normal                           | 2,077 (45.1)     | 1,098 (48.2)     | 979 (42.1)       | 1,145 (47.5)     | 932 (42.4)       |
| Underweight                      | 1,099 (23.9)     | 715 (31.4)       | 384 (16.5)       | 589 (24.4)       | 511 (23.2)       |
| Overweight                       | 1,084 (23.5)     | 390 (17.1)       | 694 (29.8)       | 554 (23.0)       | 530 (24.1)       |
| Obese                            | 345 (7.5)        | 76 (3.3)         | 269 (11.6)       | 121 (5.0)        | 226 (10.3)       |
| Waist Circumference <sup>s</sup> | 79.0 (71.4-87.9) | 76.1 (69.6-83.9) | 82.3 (74.1-91.2) | 81.0 (73.3-89.1) | 77.1 (69.1-86.4) |
| Waist Circumference              |                  |                  |                  |                  |                  |
| Male: <90 cm/ Female: <80 cm     | 3,226 (68.5)     | 1,859 (80.4)     | 1,367 (57.0)     | 1,887 (77.1)     | 1,340 (59.1)     |
| Male: >= 90 cm/ Female: >=80 cm  | 1,485 (31.5)     | 452 (19.6)       | 1,033 (43.0)     | 560 (22.9)       | 927 (40.9)       |
| Self-reported diabetes           |                  |                  |                  |                  |                  |
| No                               | 4,234 (88.0)     | 2,167 (92.4)     | 2,067 (83.8)     | 2,212 (89.1)     | 2,026 (86.8)     |
| Yes                              | 579 (12.0)       | 178 (7.6)        | 401 (16.2)       | 270 (10.9)       | 309 (13.2)       |

\* Column percentages

\*\* Never married, widows, divorced and separated

\*\*\* Hindu, Christian, Buddhist and others

\$ Median and Interquartile Range (IQR) calculated for the continuous variables

**Table 2: Prevalence of hypertension according to background characteristics among elderly males and females (weighted) with 95% Confidence Interval (CI)<sup>‡</sup>**

| Variables                       | Overall           | Male              | Female            |
|---------------------------------|-------------------|-------------------|-------------------|
|                                 | % (95% CI)        | % (95% CI)        | % (95% CI)        |
| Overall                         | 49.0 (45.2, 52.9) | 42.4 (37.4, 47.6) | 56.3 (52.1, 60.4) |
| Age Group (in Years)            |                   |                   |                   |
| 60 to 69 years                  | 47.6 (43.9, 51.4) | 40.7 (35.3, 46.3) | 55.2 (50.2, 60.0) |
| 70 years and above              | 51.5 (45.4, 57.6) | 45.5 (37.9, 53.3) | 58.4 (52.9, 63.7) |
| Place of Residence              |                   |                   |                   |
| Rural                           | 49.0 (45.0, 52.9) | 42.4 (37.3, 47.7) | 56.2 (51.9, 60.5) |
| Non-slum urban                  | 53.1 (48.4, 57.8) | 44.9 (38.5, 51.4) | 62.9 (57.7, 67.8) |
| Slum                            | 39.7 (32.4, 47.4) | 29.7 (24.0, 36.1) | 50.3 (40.9, 59.6) |
| Educational status              |                   |                   |                   |
| No education                    | 46.9 (42.6, 51.2) | 34.4 (29.2, 40.0) | 55.6 (51.0, 60.2) |
| Up to 5 <sup>th</sup> grade     | 49.0 (40.3, 57.8) | 44.1 (31.8, 57.2) | 57.1 (47.4, 66.2) |
| Up to 10 <sup>th</sup> grade    | 50.6 (45.0, 56.1) | 47.4 (41.0, 53.8) | 58.8 (47.3, 69.5) |
| Above 10 <sup>th</sup> grade    | 66.8 (58.3, 74.3) | 65.7 (56.8, 73.6) | 81.2 (48.5, 95.2) |
| Wealth Quintile                 |                   |                   |                   |
| Least wealthy (Q1)              | 44.9 (38.8, 51.1) | 39.3 (31.9, 47.1) | 52.4 (43.5, 61.1) |
| Lower (Q2)                      | 48.4 (43.8, 53.0) | 39.0 (33.9, 44.3) | 57.5 (51.4, 63.3) |
| Middle (Q3)                     | 51.2 (45.3, 57.1) | 45.1 (38.1, 52.2) | 58.2 (50.4, 65.7) |
| Upper (Q4)                      | 46.4 (38.0, 55.1) | 41.2 (31.5, 51.8) | 52.2 (41.1, 63.1) |
| Wealthiest (Q5)                 | 56.5 (51.2, 61.7) | 51.3 (44.6, 57.8) | 61.7 (51.9, 70.6) |
| Marital Status                  |                   |                   |                   |
| Currently married               | 44.9 (40.7, 49.2) | 41.4 (36.3, 46.8) | 54.0 (48.2, 59.7) |
| Others*                         | 57.8 (53.6, 61.9) | 57.8 (48.6, 66.4) | 57.8 (53.2, 62.3) |
| Religion                        |                   |                   |                   |
| Muslim                          | 48.5 (44.0, 53.0) | 41.7 (36.0, 47.6) | 56.1 (51.3, 60.8) |
| Others**                        | 51.6 (47.4, 55.8) | 46.0 (39.0, 53.2) | 57.3 (52.5, 62.1) |
| Physical Activity               |                   |                   |                   |
| ≥150 Minutes/week               | 44.6 (40.9, 48.3) | 36.5 (31.3, 42.0) | 53.8 (49.6, 57.9) |
| <150 Minutes/week               | 56.2 (51.0, 61.2) | 52.3 (45.6, 59.0) | 60.1 (53.9, 66.1) |
| Fruits & Vegetables Consumption |                   |                   |                   |
| ≥5 servings/day                 | 44.7 (36.6, 53.0) | 37.0 (27.4, 47.7) | 62.6 (50.9, 73.0) |
| <5 servings/day                 | 49.5 (45.5, 53.4) | 43.2 (38.2, 48.3) | 55.9 (51.4, 60.3) |
| Current smokers                 |                   |                   |                   |
| No                              | 52.2 (48.2, 56.3) | 46.7 (41.1, 52.3) | 56.4 (52.1, 60.6) |
| Yes                             | 34.8 (29.9, 40.1) | 33.9 (28.5, 39.7) | 52.2 (36.0, 68.0) |
| Smokeless tobacco use           |                   |                   |                   |
| No                              | 49.3 (44.7, 53.8) | 42.3 (36.9, 47.8) | 59.1 (52.3, 65.6) |
| Yes                             | 48.8 (44.5, 53.1) | 42.5 (36.1, 49.3) | 54.3 (49.7, 58.8) |
| Body Mass Index                 |                   |                   |                   |
| Normal                          | 46.5 (42.2, 50.8) | 38.5 (33.5, 43.9) | 56.3 (50.7, 61.8) |
| Underweight                     | 32.9 (27.3, 39.0) | 30.0 (22.3, 39.1) | 36.6 (29.9, 43.8) |
| Overweight                      | 64.2 (58.9, 69.1) | 60.2 (54.4, 65.7) | 68.0 (59.5, 75.4) |
| Obese                           | 74.8 (64.3, 83.0) | 72.5 (57.7, 83.6) | 76.4 (62.6, 86.3) |
| Waist Circumference             |                   |                   |                   |
| Male: <90 cm/ Female: <80 cm    | 41.7 (37.3, 46.1) | 36.6 (31.4, 42.1) | 48.9 (43.4, 54.4) |
| Male: ≥90 cm/ Female: ≥80 cm    | 67.8 (63.7, 71.6) | 65.4 (58.4, 71.8) | 69.2 (63.0, 74.7) |
| Self-reported diabetes          |                   |                   |                   |
| No                              | 47.5 (43.8, 51.1) | 40.9 (36.0, 46.0) | 54.9 (51.1, 58.7) |
| Yes                             | 64.9 (55.2, 73.5) | 60.5 (49.6, 70.5) | 68.5 (56.2, 78.7) |

<sup>‡</sup>Test was done between hypertension (Yes vs. No) and gender (Male vs. Female) for categories of the variables;

\*Never married, widows, divorced and separated

\*\*Hindu, Christian, Buddhist and others

Table 3: Factors associated with hypertension among elderly Bangladeshi people stratified by gender

| Variables                                    | Male    |            |         |            | Female  |             |        |            |
|----------------------------------------------|---------|------------|---------|------------|---------|-------------|--------|------------|
|                                              | COR     | 95% CI     | AOR     | 95% CI     | COR     | 95% CI      | AOR    | 95% CI     |
| <b>Age (in Years)</b>                        |         |            |         |            |         |             |        |            |
| 60 to 69                                     | Ref     |            | Ref     |            | Ref     |             | Ref    |            |
| 70+                                          | 1.42*** | 1.19, 1.68 | 1.32**  | 1.09, 1.60 | 1.39*** | 1.17, 1.66  | 1.40** | 1.15, 1.71 |
| <b>Place of Residence</b>                    |         |            |         |            |         |             |        |            |
| Rural                                        | Ref     |            | Ref     |            | Ref     |             | Ref    |            |
| Non-slum urban                               | 1.72*** | 1.38, 2.15 | 0.93    | 0.69, 1.23 | 1.87*** | 1.48, 2.37) | 1.18   | 0.88, 1.59 |
| Slum                                         | 0.76    | 0.58, 1.00 | 0.71*   | 0.52, 0.96 | 0.88    | 0.69, 1.13  | 0.89   | 0.67, 1.17 |
| <b>Educational status</b>                    |         |            |         |            |         |             |        |            |
| No education                                 | Ref     |            | Ref     |            | Ref     |             | Ref    |            |
| Up to 5 <sup>th</sup> grade                  | 1.07    | 0.84, 1.37 | 0.92    | 0.71, 1.19 | 1.00    | 0.75, 1.33  | 0.95   | 0.70, 1.28 |
| Up to 10 <sup>th</sup> grade                 | 1.62*** | 1.32, 1.98 | 1.25*   | 1.00, 1.56 | 1.71*** | 1.30, 2.25  | 1.27   | 0.94, 1.72 |
| Above 10 <sup>th</sup> grade                 | 3.12*** | 2.44, 3.99 | 1.83*** | 1.38, 2.44 | 3.79**  | 1.68, 8.57  | 2.41   | 0.97, 6.00 |
| <b>Wealth Quintile</b>                       |         |            |         |            |         |             |        |            |
| Least wealthy                                | Ref     |            | Ref     |            | Ref     |             | Ref    |            |
| Lower                                        | 0.95    | 0.74, 1.23 | 0.95    | 0.73, 1.24 | 1.28    | 0.98, 1.66  | 1.25   | 0.95, 1.64 |
| Middle                                       | 1.37*   | 1.07, 1.75 | 1.19    | 0.91, 1.55 | 1.41*   | 1.08, 1.84  | 1.32   | 1.00, 1.75 |
| Upper                                        | 1.23    | 0.96, 1.57 | 0.94    | 0.71, 1.23 | 1.19    | 0.91, 1.55  | 0.94   | 0.71, 1.26 |
| Wealthiest                                   | 1.75*** | 1.36, 2.25 | 0.94    | 0.69, 1.28 | 1.66*** | 1.27, 2.16  | 1.04   | 0.76, 1.44 |
| <b>Marital Status</b>                        |         |            |         |            |         |             |        |            |
| Currently married                            | Ref     |            | Ref     |            | Ref     |             | Ref    |            |
| Others <sup>‡</sup>                          | 1.37*   | 1.03, 1.82 | 1.13    | 0.82, 1.56 | 1.23*   | 1.02, 1.49  | 1.03   | 0.84, 1.28 |
| <b>Religion</b>                              |         |            |         |            |         |             |        |            |
| Muslim                                       | Ref     |            | Ref     |            | Ref     |             |        |            |
| Others <sup>‡‡</sup>                         | 1.28*   | 1.03, 1.60 | 1.18    | 0.93, 1.51 | 0.99    | 0.79, 1.24  | NA     | NA         |
| <b>Physical Activity</b>                     |         |            |         |            |         |             |        |            |
| ≥150 minutes/week                            | Ref     |            | Ref     |            | Ref     |             | Ref    |            |
| <150 minutes/week                            | 1.95*** | 1.66, 2.29 | 1.50*** | 1.25, 1.81 | 1.72*** | 1.45, 2.03  | 1.38** | 1.15, 1.67 |
| <b>Fruits &amp; Vegetables</b>               |         |            |         |            |         |             |        |            |
| ≥5 servings/day                              | Ref     |            | Ref     |            | Ref     |             |        |            |
| <5 servings/day                              | 1.35*   | 1.06, 1.72 | 1.24    | 0.95, 1.60 | 0.98    | 0.68, 1.40  | NA     | NA         |
| <b>Current smoker (for ≥30 days)</b>         |         |            |         |            |         |             |        |            |
| No                                           | Ref     |            | Ref     |            | Ref     |             | Ref    |            |
| Yes                                          | 0.55*** | 0.47, 0.65 | 0.74**  | 0.61, 0.89 | 0.65    | 0.41, 1.05  | 0.69   | 0.42, 1.15 |
| <b>Smokeless tobacco user (for ≥30 days)</b> |         |            |         |            |         |             |        |            |
| No                                           | Ref     |            | Ref     |            | Ref     |             | Ref    |            |
| Yes                                          | 0.80**  | 0.68, 0.94 | 0.86    | 0.72, 1.02 | 0.74**  | 0.63, 0.88  | 0.87   | 0.72, 1.04 |
| <b>Body Mass Index (BMI)</b>                 |         |            |         |            |         |             |        |            |

|                                  |         |               |         |            |         |            |         |            |
|----------------------------------|---------|---------------|---------|------------|---------|------------|---------|------------|
| Normal                           | Ref     |               | Ref     |            | Ref     |            | Ref     |            |
| Underweight                      | 0.62*** | 0.50,<br>0.77 | NA      | NA         | 0.56*** | 0.45, 0.69 | NA      | NA         |
| Overweight                       | 2.25*** | 1.83,<br>2.77 | NA      | NA         | 1.69*** | 1.35, 2.12 | NA      | NA         |
| Obese                            | 4.53*** | 2.96,<br>6.93 | NA      | NA         | 2.99*** | 2.10, 4.25 | NA      | NA         |
| <b>Waist Circumference</b>       |         |               |         |            |         |            |         |            |
| Males <102 cm;<br>Females <88 cm | Ref     |               | Ref     |            | Ref     |            | Ref     |            |
| Males ≥102 cm;<br>Females ≥88 cm | 3.39*** | 2.78,<br>4.14 | 2.76*** | 2.22, 3.43 | 2.46*** | 2.06, 2.94 | 2.20*** | 1.82, 2.67 |
| <b>Self-reported Diabetes</b>    |         |               |         |            |         |            |         |            |
| No                               | Ref     |               | Ref     |            | Ref     |            | Ref     |            |
| Yes                              | 2.22*** | 1.72,<br>2.88 | 1.36*   | 1.02, 1.82 | 2.45*** | 1.85, 3.23 | 1.82*** | 1.35, 2.45 |

\* p < 0.05, \*\* p < 0.01, \*\*\* p < 0.001; CI: Confidence Interval; COR: Crude Odds Ratio; AOR: Adjusted Odds Ratio;  
 NA: Not applicable, these variables were not included in the adjusted analysis as these were dropped either due to the significance level was >0.2 in the crude analysis or due to high correlation with a covariate.

‡Never married, widows, divorced and separated

‡‡Hindu, Christian, Buddhist and others

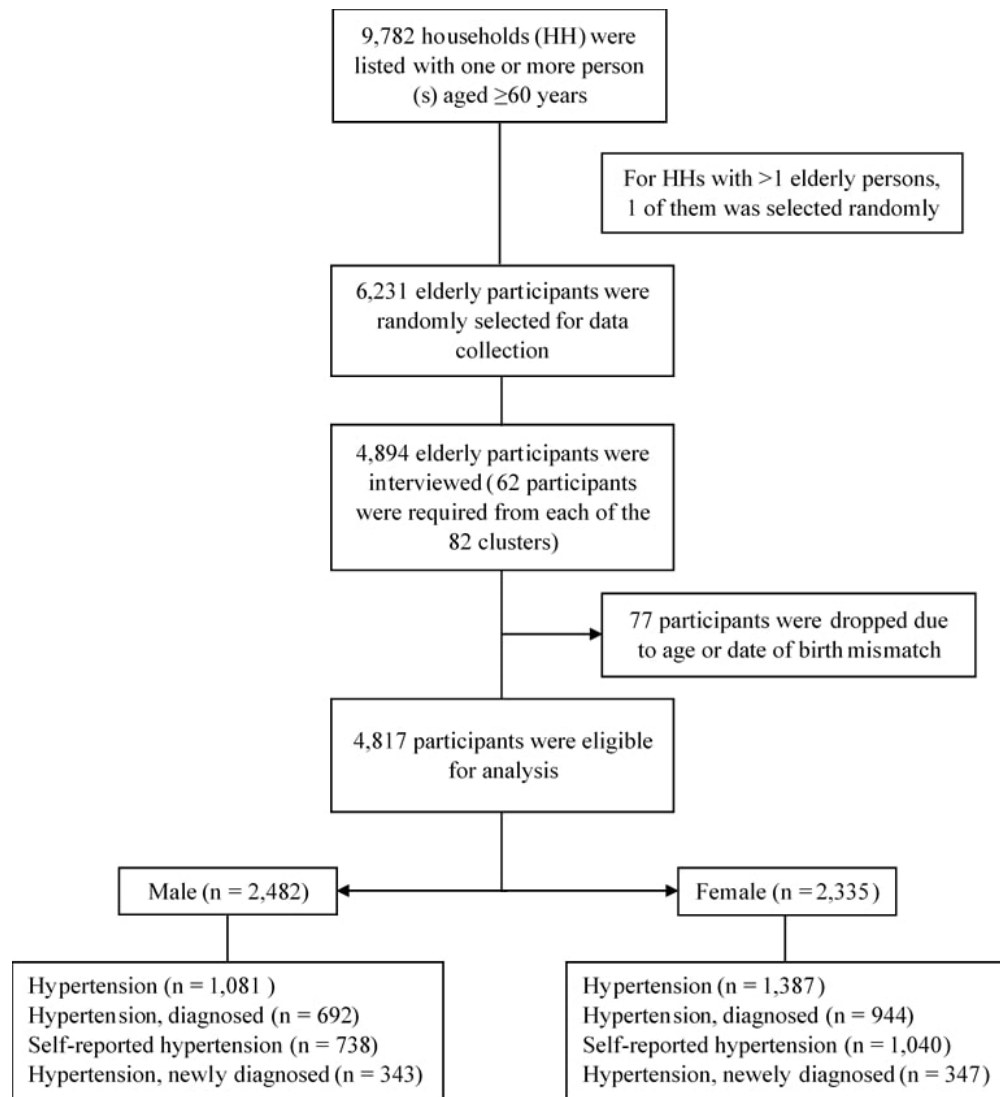Figure 1: Study flow chart of participants selection (aged  $\geq 60$  years)

65x71mm (300 x 300 DPI)

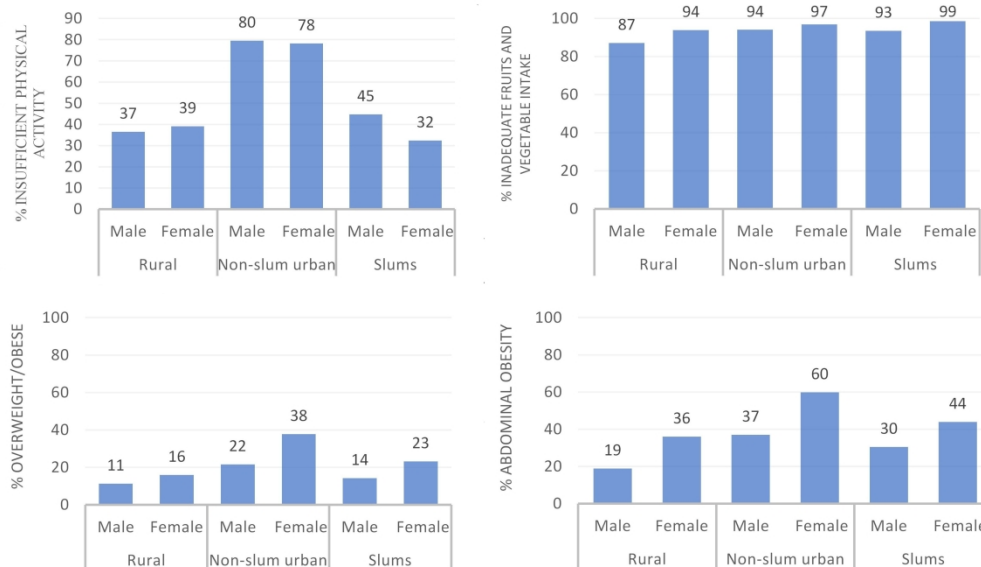

Figure 2: Selected behavioral and clinical characteristics by area of residence and gender

Supplementary Table 1: Factors associated with hypertension among elderly Bangladeshi people stratified by gender (adjusted for age, BMI, and waist circumference as continuous variables)

| Variables                                         | Male    |            |         |            | Female  |            |         |            |
|---------------------------------------------------|---------|------------|---------|------------|---------|------------|---------|------------|
|                                                   | COR     | 95% CI     | AOR     | 95% CI     | COR     | 95% CI     | AOR     | 95% CI     |
| Age (years) <sup>s</sup>                          | 1.02*** | 1.01, 1.03 | 1.03*** | 1.01, 1.04 | 1.02*** | 1.01, 1.03 | 1.03*** | 1.02, 1.04 |
| Place of Residence                                |         |            |         |            |         |            |         |            |
| Rural                                             | Ref     |            | Ref     |            | Ref     |            | Ref     |            |
| Non-slum urban                                    | 1.72*** | 1.38, 2.15 | 0.90    | 0.67, 1.20 | 1.87*** | 1.48, 2.37 | 1.10    | 0.81, 1.49 |
| Slum                                              | 0.76    | 0.58, 1.00 | 0.69*   | 0.50, 0.93 | 0.88    | 0.69, 1.13 | 0.88    | 0.67, 1.17 |
| Educational status                                |         |            |         |            |         |            |         |            |
| No education                                      | Ref     |            | Ref     |            | Ref     |            | Ref     |            |
| Up to primary                                     | 1.07    | 0.84, 1.37 | 0.90    | 0.69, 1.17 | 1.00    | 0.75, 1.33 | 0.92    | 0.68, 1.26 |
| Up to SSC                                         | 1.62*** | 1.32, 1.98 | 1.20    | 0.96, 1.5  | 1.71*** | 1.30, 2.25 | 1.21    | 0.9, 1.64  |
| Above SSC                                         | 3.12*** | 2.44, 3.99 | 1.69*** | 1.26, 2.26 | 3.79**  | 1.68, 8.57 | 2.14    | 0.85, 5.36 |
| Wealth Quintile                                   |         |            |         |            |         |            |         |            |
| Least wealthy (Q1)                                | Ref     |            | Ref     |            | Ref     |            | Ref     |            |
| Lower (Q2)                                        | 0.95    | 0.74, 1.23 | 0.91    | 0.70, 1.2  | 1.28    | 0.98, 1.66 | 1.26    | 0.95, 1.66 |
| Middle (Q3)                                       | 1.37*   | 1.07, 1.75 | 1.14    | 0.87, 1.49 | 1.41*   | 1.08, 1.84 | 1.32    | 0.99, 1.75 |
| Upper (Q4)                                        | 1.23    | 0.96, 1.57 | 0.85    | 0.65, 1.13 | 1.19    | 0.91, 1.55 | 0.91    | 0.68, 1.22 |
| Wealthiest (Q5)                                   | 1.75*** | 1.36, 2.25 | 0.83    | 0.61, 1.14 | 1.66*** | 1.27, 2.16 | 1       | 0.73, 1.39 |
| Marital Status                                    |         |            |         |            |         |            |         |            |
| Currently married                                 | Ref     |            | Ref     |            | Ref     |            | Ref     |            |
| Others <sup>£</sup>                               | 1.37*   | 1.03, 1.82 | 1.16    | 0.84, 1.61 | 1.23*   | 1.02, 1.49 | 1.00    | 0.81, 1.24 |
| Religion                                          |         |            |         |            |         |            |         |            |
| Muslim                                            | Ref     |            | Ref     |            | Ref     |            |         |            |
| Others <sup>££</sup>                              | 1.28*   | 1.03, 1.60 | 1.17    | 0.92, 1.50 | 0.99    | 0.79, 1.24 | NA      | NA         |
| Physical Activity                                 |         |            |         |            |         |            |         |            |
| ≥150 Minutes/week                                 | Ref     |            | Ref     |            | Ref     |            | Ref     |            |
| <150 Minutes/week                                 | 1.95*** | 1.66, 2.29 | 1.44*** | 1.19, 1.74 | 1.72*** | 1.45, 2.03 | 1.31**  | 1.09, 1.59 |
| Fruits & Vegetables Consumption                   |         |            |         |            |         |            |         |            |
| ≥5 servings/day                                   | Ref     |            | Ref     |            | Ref     |            | Ref     |            |
| <5 servings/day                                   | 1.35*   | 1.06, 1.72 | 1.24    | 0.95, 1.61 | 0.98    | 0.68, 1.40 | NA      | NA         |
| Currently smoking                                 |         |            |         |            |         |            |         |            |
| No                                                | Ref     |            | Ref     |            | Ref     |            | Ref     |            |
| Yes                                               | 0.55*** | 0.47, 0.65 | 0.81*   | 0.67, 0.97 | 0.65    | 0.41, 1.05 | 0.73    | 0.44, 1.23 |
| Smokeless tobacco use                             |         |            |         |            |         |            |         |            |
| No                                                | Ref     |            | Ref     |            | Ref     |            | Ref     |            |
| Yes                                               | 0.80**  | 0.68, 0.94 | 0.84    | 0.70, 1.00 | 0.74**  | 0.63, 0.88 | 0.87    | 0.73, 1.05 |
| Body Mass Index (Kg/M <sup>2</sup> ) <sup>s</sup> | 1.18*** | 1.15, 1.21 | NA      | NA         | 1.14*** | 1.11, 1.17 | NA      | NA         |



|                                       |         |            |         |            |         |            |         |            |
|---------------------------------------|---------|------------|---------|------------|---------|------------|---------|------------|
| Waist Circumference (cm) <sup>§</sup> | 1.06*** | 1.05, 1.07 | 1.06*** | 1.05, 1.07 | 1.05*** | 1.04, 1.06 | 1.05*** | 1.04, 1.05 |
| Self-reported diabetes                |         |            |         |            |         |            |         |            |
| No                                    | Ref     |            | Ref     |            | Ref     |            | Ref     |            |
| Yes                                   | 2.22*** | 1.72, 2.88 | 1.26    | 0.94, 1.69 | 2.45*** | 1.85, 3.23 | 1.59**  | 1.18, 2.16 |

\* p < 0.05, \*\* p < 0.01, \*\*\* p < 0.001; CI: Confidence Interval; COR: Crude Odds Ratio; AOR: Adjusted Odds Ratio;

NA: Not applicable, these variables were not included in the adjusted analysis as these were dropped due to the significance level was >0.2 in the crude analysis

§: Continuous variables

£Never married, widow/widower, divorced and separated

££Hindu, Buddhist, Christian and others

Supplementary Table 2: Factors associated with hypertension among elderly Bangladeshi people stratified by gender (adjusted for body mass index instead of waist circumference)

| Variables                    | Male    |            |         |            | Female  |             |         |            |
|------------------------------|---------|------------|---------|------------|---------|-------------|---------|------------|
|                              | COR     | 95% CI     | AOR     | 95% CI     | COR     | 95% CI      | AOR     | 95% CI     |
| Age (years) <sup>§</sup>     | 1.02*** | 1.01, 1.03 | 1.02*** | 1.01, 1.04 | 1.02*** | 1.01, 1.03  | 1.03*** | 1.02, 1.04 |
| <b>Place of Residence</b>    |         |            |         |            |         |             |         |            |
| Rural                        | Ref     |            | Ref     |            | Ref     |             | Ref     |            |
| Non-slum urban               | 1.72*** | 1.38, 2.15 | 0.90    | 0.67, 1.20 | 1.87*** | 1.48, 2.37) | 1.11    | 0.81, 1.50 |
| Slum                         | 0.76    | 0.58, 1.00 | 0.68*   | 0.50, 0.92 | 0.88    | 0.69, 1.13  | 0.90    | 0.68, 1.19 |
| <b>Educational status</b>    |         |            |         |            |         |             |         |            |
| No education                 | Ref     |            | Ref     |            | Ref     |             | Ref     |            |
| Up to 5 <sup>th</sup> grade  | 1.07    | 0.84, 1.37 | 0.94    | 0.72, 1.22 | 1.00    | 0.75, 1.33  | 0.98    | 0.72, 1.33 |
| Up to 10 <sup>th</sup> grade | 1.62*** | 1.32, 1.98 | 1.23    | 0.98, 1.54 | 1.71*** | 1.30, 2.25  | 1.29    | 0.95, 1.75 |
| Above 10 <sup>th</sup> grade | 3.12*** | 2.44, 3.99 | 1.76*** | 1.32, 2.36 | 3.79**  | 1.68, 8.57  | 2.33    | 0.93, 5.81 |
| <b>Wealth Quintile</b>       |         |            |         |            |         |             |         |            |
| Least wealthy                | Ref     |            | Ref     |            | Ref     |             | Ref     |            |
| Lower                        | 0.95    | 0.74, 1.23 | 0.94    | 0.72, 1.23 | 1.28    | 0.98, 1.66  | 1.28    | 0.97, 1.69 |
| Middle                       | 1.37*   | 1.07, 1.75 | 1.17    | 0.89, 1.53 | 1.41*   | 1.08, 1.84  | 1.35    | 1.02, 1.81 |
| Upper                        | 1.23    | 0.96, 1.57 | 0.93    | 0.7, 1.23  | 1.19    | 0.91, 1.55  | 0.92    | 0.68, 1.24 |
| Wealthiest                   | 1.75*** | 1.36, 2.25 | 0.94    | 0.69, 1.28 | 1.66*** | 1.27, 2.16  | 1.03    | 0.74, 1.43 |
| <b>Marital Status</b>        |         |            |         |            |         |             |         |            |
| Currently married            | Ref     |            | Ref     |            | Ref     |             | Ref     |            |
| Others <sup>£</sup>          | 1.37*   | 1.03, 1.82 | 1.11    | 0.80, 1.55 | 1.23*   | 1.02, 1.49  | 1.03    | 0.83, 1.27 |
| <b>Religion</b>              |         |            |         |            |         |             |         |            |
| Muslim                       | Ref     |            | Ref     |            | Ref     |             |         |            |
| Others <sup>££</sup>         | 1.28*   | 1.03, 1.60 | 1.12    | 0.88, 1.43 | 0.99    | 0.79, 1.24  | NA      | NA         |

|                                |         |            |         |            |         |            |         |            |
|--------------------------------|---------|------------|---------|------------|---------|------------|---------|------------|
| <b>Physical Activity</b>       |         |            |         |            |         |            |         |            |
| ≥150 minutes/week              | Ref     |            | Ref     |            | Ref     |            | Ref     |            |
| <150 minutes/week              | 1.95*** | 1.66, 2.29 | 1.46*** | 1.21, 1.76 | 1.72*** | 1.45, 2.03 | 1.34**  | 1.10, 1.62 |
| <b>Fruits &amp; Vegetables</b> |         |            |         |            |         |            |         |            |
| ≥5 servings/day                | Ref     |            | Ref     |            | Ref     |            |         |            |
| <5 servings/day                | 1.35*   | 1.06, 1.72 | 1.22    | 0.94, 1.59 | 0.98    | 0.68, 1.40 | NA      | NA         |
| <b>Currently smokers</b>       |         |            |         |            |         |            |         |            |
| No                             | Ref     |            | Ref     |            | Ref     |            | Ref     |            |
| Yes                            | 0.55*** | 0.47, 0.65 | 0.79*   | 0.65, 0.95 | 0.65    | 0.41, 1.05 | 0.8     | 0.47, 1.35 |
| <b>Smokeless tobacco use</b>   |         |            |         |            |         |            |         |            |
| No                             | Ref     |            | Ref     |            | Ref     |            | Ref     |            |
| Yes                            | 0.80**  | 0.68, 0.94 | 0.83*   | 0.7, 1     | 0.74**  | 0.63, 0.88 | 0.87    | 0.72, 1.04 |
| <b>Body Mass Index (BMI)</b>   |         |            |         |            |         |            |         |            |
| Normal                         | Ref     |            | Ref     |            | Ref     |            | Ref     |            |
| Underweight                    | 0.62*** | 0.50, 0.77 | 0.61*** | 0.49, 0.77 | 0.56*** | 0.45, 0.69 | 0.53*** | 0.42, 0.66 |
| Overweight                     | 2.25*** | 1.83, 2.77 | 1.96*** | 1.57, 2.45 | 1.69*** | 1.35, 2.12 | 1.62*** | 1.28, 2.05 |
| Obese                          | 4.53*** | 2.96, 6.93 | 3.7***  | 2.37, 5.79 | 2.99*** | 2.10, 4.25 | 2.59*** | 1.78, 3.75 |
| <b>Waist Circumference</b>     |         |            |         |            |         |            |         |            |
| Male: <90 cm/ Female: <80 cm   | Ref     |            | Ref     |            | Ref     |            | Ref     |            |
| Male: ≥90 cm/ Female: ≥80 cm   | 3.39*** | 2.78, 4.14 | \$      | \$         | 2.46*** | 2.06, 2.94 | \$      | \$         |
| <b>Self-reported Diabetes</b>  |         |            |         |            |         |            |         |            |
| No                             | Ref     |            | Ref     |            | Ref     |            | Ref     |            |
| Yes                            | 2.22*** | 1.72, 2.88 | 1.32    | 0.98, 1.77 | 2.45*** | 1.85, 3.23 | 1.73*** | 1.28, 2.34 |

\* p < 0.05, \*\* p < 0.01, \*\*\* p < 0.001; CI: Confidence Interval; COR: Crude Odds Ratio; AOR: Adjusted Odds Ratio;

NA: Not applicable, these variables were not included in the adjusted analysis as these were dropped due to the significance level was >0.2 in the crude analysis

\$: Although waist circumference was used in the final model, BMI is used here to produce a supplementary table to show to results of the analysis using BMI instead of waist circumference.

‡Never married, widow/widower, divorced and separated

‡‡Hindu, Buddhist, Christian and others

**STROBE 2007 (v4) Statement—Checklist of items that should be included in reports of *cross-sectional studies***

| Section/Topic                | Item # | Recommendation                                                                                                                                                                       | Reported on page # |
|------------------------------|--------|--------------------------------------------------------------------------------------------------------------------------------------------------------------------------------------|--------------------|
| <b>Title and abstract</b>    | 1      | (a) Indicate the study's design with a commonly used term in the title or the abstract                                                                                               | 1                  |
|                              |        | (b) Provide in the abstract an informative and balanced summary of what was done and what was found                                                                                  | 1-2                |
| <b>Introduction</b>          |        |                                                                                                                                                                                      |                    |
| Background/rationale         | 2      | Explain the scientific background and rationale for the investigation being reported                                                                                                 | 3                  |
| Objectives                   | 3      | State specific objectives, including any prespecified hypotheses                                                                                                                     | 3-4                |
| <b>Methods</b>               |        |                                                                                                                                                                                      |                    |
| Study design                 | 4      | Present key elements of study design early in the paper                                                                                                                              | 4                  |
| Setting                      | 5      | Describe the setting, locations, and relevant dates, including periods of recruitment, exposure, follow-up, and data collection                                                      | 4                  |
| Participants                 | 6      | (a) Give the eligibility criteria, and the sources and methods of selection of participants                                                                                          | 4-5                |
| Variables                    | 7      | Clearly define all outcomes, exposures, predictors, potential confounders, and effect modifiers. Give diagnostic criteria, if applicable                                             | 6-7                |
| Data sources/<br>measurement | 8*     | For each variable of interest, give sources of data and details of methods of assessment (measurement). Describe comparability of assessment methods if there is more than one group | 6-7                |
| Bias                         | 9      | Describe any efforts to address potential sources of bias                                                                                                                            | 6-7                |
| Study size                   | 10     | Explain how the study size was arrived at                                                                                                                                            | 4-5                |
| Quantitative variables       | 11     | Explain how quantitative variables were handled in the analyses. If applicable, describe which groupings were chosen and why                                                         | 7                  |
| Statistical methods          | 12     | (a) Describe all statistical methods, including those used to control for confounding                                                                                                | 7                  |
|                              |        | (b) Describe any methods used to examine subgroups and interactions                                                                                                                  | Not applicable     |
|                              |        | (c) Explain how missing data were addressed                                                                                                                                          | Not applicable     |
|                              |        | (d) If applicable, describe analytical methods taking account of sampling strategy                                                                                                   | 7                  |
|                              |        | (e) Describe any sensitivity analyses                                                                                                                                                | Not applicable     |
| <b>Results</b>               |        |                                                                                                                                                                                      |                    |

|                          |     |                                                                                                                                                                                                              |                |
|--------------------------|-----|--------------------------------------------------------------------------------------------------------------------------------------------------------------------------------------------------------------|----------------|
| Participants             | 13* | (a) Report numbers of individuals at each stage of study—eg numbers potentially eligible, examined for eligibility, confirmed eligible, included in the study, completing follow-up, and analysed            | 5              |
|                          |     | (b) Give reasons for non-participation at each stage                                                                                                                                                         | Not applicable |
|                          |     | (c) Consider use of a flow diagram                                                                                                                                                                           | 5              |
| Descriptive data         | 14* | (a) Give characteristics of study participants (eg demographic, clinical, social) and information on exposures and potential confounders                                                                     | 7-8            |
|                          |     | (b) Indicate number of participants with missing data for each variable of interest                                                                                                                          | Not applicable |
| Outcome data             | 15* | Report numbers of outcome events or summary measures                                                                                                                                                         | 7-8            |
| Main results             | 16  | (a) Give unadjusted estimates and, if applicable, confounder-adjusted estimates and their precision (eg, 95% confidence interval). Make clear which confounders were adjusted for and why they were included | 7-9            |
|                          |     | (b) Report category boundaries when continuous variables were categorized                                                                                                                                    | Not applicable |
|                          |     | (c) If relevant, consider translating estimates of relative risk into absolute risk for a meaningful time period                                                                                             | Not applicable |
| Other analyses           | 17  | Report other analyses done—eg analyses of subgroups and interactions, and sensitivity analyses                                                                                                               | Not applicable |
| <b>Discussion</b>        |     |                                                                                                                                                                                                              |                |
| Key results              | 18  | Summarise key results with reference to study objectives                                                                                                                                                     | 8-9            |
| Limitations              | 19  | Discuss limitations of the study, taking into account sources of potential bias or imprecision. Discuss both direction and magnitude of any potential bias                                                   | 12             |
| Interpretation           | 20  | Give a cautious overall interpretation of results considering objectives, limitations, multiplicity of analyses, results from similar studies, and other relevant evidence                                   | 12             |
| Generalisability         | 21  | Discuss the generalisability (external validity) of the study results                                                                                                                                        | 10-12          |
| <b>Other information</b> |     |                                                                                                                                                                                                              |                |
| Funding                  | 22  | Give the source of funding and the role of the funders for the present study and, if applicable, for the original study on which the present article is based                                                | 16             |

\*Give information separately for cases and controls in case-control studies and, if applicable, for exposed and unexposed groups in cohort and cross-sectional studies.

**Note:** An Explanation and Elaboration article discusses each checklist item and gives methodological background and published examples of transparent reporting. The STROBE checklist is best used in conjunction with this article (freely available on the Web sites of PLoS Medicine at <http://www.plosmedicine.org/>, Annals of Internal Medicine at <http://www.annals.org/>, and Epidemiology at <http://www.epidem.com/>). Information on the STROBE Initiative is available at [www.strobe-statement.org](http://www.strobe-statement.org).
