# Supplementary material for: Gender-specific prevalence and associated factors of hypertension among elderly Bangladeshi people: findings from a nationally representative cross-sectional survey
Source: PubMed Central journal article supplement — BMJ Open. 2021 Jan 21;11(1):e038326. doi: 10.1136/bmjopen-2020-038326 (PMC7825269; doi:10.1136/bmjopen-2020-038326), 2021-01-21
Supplement: bmjopen-2020-038326supp001.pdf [file bmjopen-2020-038326supp001.pdf]

Supplementary Table 1: Factors associated with hypertension among elderly Bangladeshi people stratified by gender (adjusted for age, BMI, and waist circumference as continuous variables)

| Variables                                         | Male    |            |         |            | Female  |            |         |            |
|---------------------------------------------------|---------|------------|---------|------------|---------|------------|---------|------------|
|                                                   | COR     | 95% CI     | AOR     | 95% CI     | COR     | 95% CI     | AOR     | 95% CI     |
| Age (years) <sup>§</sup>                          | 1.02*** | 1.01, 1.03 | 1.03*** | 1.01, 1.04 | 1.02*** | 1.01, 1.03 | 1.03*** | 1.02, 1.04 |
| Place of Residence                                |         |            |         |            |         |            |         |            |
| Rural                                             | Ref     |            | Ref     |            | Ref     |            | Ref     |            |
| Non-slum urban                                    | 1.72*** | 1.38, 2.15 | 0.90    | 0.67, 1.20 | 1.87*** | 1.48, 2.37 | 1.10    | 0.81, 1.49 |
| Slum                                              | 0.76    | 0.58, 1.00 | 0.69*   | 0.50, 0.93 | 0.88    | 0.69, 1.13 | 0.88    | 0.67, 1.17 |
| Educational status                                |         |            |         |            |         |            |         |            |
| No education                                      | Ref     |            | Ref     |            | Ref     |            | Ref     |            |
| Up to primary                                     | 1.07    | 0.84, 1.37 | 0.90    | 0.69, 1.17 | 1.00    | 0.75, 1.33 | 0.92    | 0.68, 1.26 |
| Up to SSC                                         | 1.62*** | 1.32, 1.98 | 1.20    | 0.96, 1.5  | 1.71*** | 1.30, 2.25 | 1.21    | 0.9, 1.64  |
| Above SSC                                         | 3.12*** | 2.44, 3.99 | 1.69*** | 1.26, 2.26 | 3.79**  | 1.68, 8.57 | 2.14    | 0.85, 5.36 |
| Wealth Quintile                                   |         |            |         |            |         |            |         |            |
| Least wealthy (Q1)                                | Ref     |            | Ref     |            | Ref     |            | Ref     |            |
| Lower (Q2)                                        | 0.95    | 0.74, 1.23 | 0.91    | 0.70, 1.2  | 1.28    | 0.98, 1.66 | 1.26    | 0.95, 1.66 |
| Middle (Q3)                                       | 1.37*   | 1.07, 1.75 | 1.14    | 0.87, 1.49 | 1.41*   | 1.08, 1.84 | 1.32    | 0.99, 1.75 |
| Upper (Q4)                                        | 1.23    | 0.96, 1.57 | 0.85    | 0.65, 1.13 | 1.19    | 0.91, 1.55 | 0.91    | 0.68, 1.22 |
| Wealthiest (Q5)                                   | 1.75*** | 1.36, 2.25 | 0.83    | 0.61, 1.14 | 1.66*** | 1.27, 2.16 | 1       | 0.73, 1.39 |
| Marital Status                                    |         |            |         |            |         |            |         |            |
| Currently married                                 | Ref     |            | Ref     |            | Ref     |            | Ref     |            |
| Others <sup>£</sup>                               | 1.37*   | 1.03, 1.82 | 1.16    | 0.84, 1.61 | 1.23*   | 1.02, 1.49 | 1.00    | 0.81, 1.24 |
| Religion                                          |         |            |         |            |         |            |         |            |
| Muslim                                            | Ref     |            | Ref     |            | Ref     |            | Ref     |            |
| Others <sup>££</sup>                              | 1.28*   | 1.03, 1.60 | 1.17    | 0.92, 1.50 | 0.99    | 0.79, 1.24 | NA      | NA         |
| Physical Activity                                 |         |            |         |            |         |            |         |            |
| >=150 Minutes/week                                | Ref     |            | Ref     |            | Ref     |            | Ref     |            |
| <150 Minutes/week                                 | 1.95*** | 1.66, 2.29 | 1.44*** | 1.19, 1.74 | 1.72*** | 1.45, 2.03 | 1.31**  | 1.09, 1.59 |
| Fruits & Vegetables Consumption                   |         |            |         |            |         |            |         |            |
| >=5 servings/day                                  | Ref     |            | Ref     |            | Ref     |            | Ref     |            |
| <5 servings/day                                   | 1.35*   | 1.06, 1.72 | 1.24    | 0.95, 1.61 | 0.98    | 0.68, 1.40 | NA      | NA         |
| Currently smoking                                 |         |            |         |            |         |            |         |            |
| No                                                | Ref     |            | Ref     |            | Ref     |            | Ref     |            |
| Yes                                               | 0.55*** | 0.47, 0.65 | 0.81*   | 0.67, 0.97 | 0.65    | 0.41, 1.05 | 0.73    | 0.44, 1.23 |
| Smokeless tobacco use                             |         |            |         |            |         |            |         |            |
| No                                                | Ref     |            | Ref     |            | Ref     |            | Ref     |            |
| Yes                                               | 0.80**  | 0.68, 0.94 | 0.84    | 0.70, 1.00 | 0.74**  | 0.63, 0.88 | 0.87    | 0.73, 1.05 |
| Body Mass Index (Kg/M <sup>2</sup> ) <sup>§</sup> | 1.18*** | 1.15, 1.21 | NA      | NA         | 1.14*** | 1.11, 1.17 | NA      | NA         |

|                                       |         |            |         |            |         |            |         |            |
|---------------------------------------|---------|------------|---------|------------|---------|------------|---------|------------|
| Waist Circumference (cm) <sup>§</sup> | 1.06*** | 1.05, 1.07 | 1.06*** | 1.05, 1.07 | 1.05*** | 1.04, 1.06 | 1.05*** | 1.04, 1.05 |
| Self-reported diabetes                |         |            |         |            |         |            |         |            |
| No                                    | Ref     |            | Ref     |            | Ref     |            | Ref     |            |
| Yes                                   | 2.22*** | 1.72, 2.88 | 1.26    | 0.94, 1.69 | 2.45*** | 1.85, 3.23 | 1.59**  | 1.18, 2.16 |

\* p < 0.05, \*\* p < 0.01, \*\*\* p < 0.001; CI: Confidence Interval; COR: Crude Odds Ratio; AOR: Adjusted Odds Ratio;

NA: Not applicable, these variables were not included in the adjusted analysis as these were dropped due to the significance level was >0.2 in the crude analysis

§: Continuous variables

<sup>£</sup>Never married, widow/widower, divorced and separated

<sup>££</sup>Hindu, Buddhist, Christian and others

Supplementary Table 2: Factors associated with hypertension among elderly Bangladeshi people stratified by gender (adjusted for body mass index instead of waist circumference)

| Variables                    | Male    |            |         |            | Female  |            |         |            |
|------------------------------|---------|------------|---------|------------|---------|------------|---------|------------|
|                              | COR     | 95% CI     | AOR     | 95% CI     | COR     | 95% CI     | AOR     | 95% CI     |
| Age (years) <sup>§</sup>     | 1.02*** | 1.01, 1.03 | 1.02*** | 1.01, 1.04 | 1.02*** | 1.01, 1.03 | 1.03*** | 1.02, 1.04 |
| <b>Place of Residence</b>    |         |            |         |            |         |            |         |            |
| Rural                        | Ref     |            | Ref     |            | Ref     |            | Ref     |            |
| Non-slum urban               | 1.72*** | 1.38, 2.15 | 0.90    | 0.67, 1.20 | 1.87*** | 1.48, 2.37 | 1.11    | 0.81, 1.50 |
| Slum                         | 0.76    | 0.58, 1.00 | 0.68*   | 0.50, 0.92 | 0.88    | 0.69, 1.13 | 0.90    | 0.68, 1.19 |
| <b>Educational status</b>    |         |            |         |            |         |            |         |            |
| No education                 | Ref     |            | Ref     |            | Ref     |            | Ref     |            |
| Up to 5 <sup>th</sup> grade  | 1.07    | 0.84, 1.37 | 0.94    | 0.72, 1.22 | 1.00    | 0.75, 1.33 | 0.98    | 0.72, 1.33 |
| Up to 10 <sup>th</sup> grade | 1.62*** | 1.32, 1.98 | 1.23    | 0.98, 1.54 | 1.71*** | 1.30, 2.25 | 1.29    | 0.95, 1.75 |
| Above 10 <sup>th</sup> grade | 3.12*** | 2.44, 3.99 | 1.76*** | 1.32, 2.36 | 3.79*** | 1.68, 8.57 | 2.33    | 0.93, 5.81 |
| <b>Wealth Quintile</b>       |         |            |         |            |         |            |         |            |
| Least wealthy                | Ref     |            | Ref     |            | Ref     |            | Ref     |            |
| Lower                        | 0.95    | 0.74, 1.23 | 0.94    | 0.72, 1.23 | 1.28    | 0.98, 1.66 | 1.28    | 0.97, 1.69 |
| Middle                       | 1.37*   | 1.07, 1.75 | 1.17    | 0.89, 1.53 | 1.41*   | 1.08, 1.84 | 1.35    | 1.02, 1.81 |
| Upper                        | 1.23    | 0.96, 1.57 | 0.93    | 0.7, 1.23  | 1.19    | 0.91, 1.55 | 0.92    | 0.68, 1.24 |
| Wealthiest                   | 1.75*** | 1.36, 2.25 | 0.94    | 0.69, 1.28 | 1.66*** | 1.27, 2.16 | 1.03    | 0.74, 1.43 |
| <b>Marital Status</b>        |         |            |         |            |         |            |         |            |
| Currently married            | Ref     |            | Ref     |            | Ref     |            | Ref     |            |
| Others <sup>£</sup>          | 1.37*   | 1.03, 1.82 | 1.11    | 0.80, 1.55 | 1.23*   | 1.02, 1.49 | 1.03    | 0.83, 1.27 |
| <b>Religion</b>              |         |            |         |            |         |            |         |            |
| Muslim                       | Ref     |            | Ref     |            | Ref     |            |         |            |
| Others <sup>££</sup>         | 1.28*   | 1.03, 1.60 | 1.12    | 0.88, 1.43 | 0.99    | 0.79, 1.24 | NA      | NA         |

|                                |         |            |         |            |         |            |         |            |
|--------------------------------|---------|------------|---------|------------|---------|------------|---------|------------|
| <b>Physical Activity</b>       |         |            |         |            |         |            |         |            |
| ≥150 minutes/week              | Ref     |            | Ref     |            | Ref     |            | Ref     |            |
| <150 minutes/week              | 1.95*** | 1.66, 2.29 | 1.46*** | 1.21, 1.76 | 1.72*** | 1.45, 2.03 | 1.34**  | 1.10, 1.62 |
| <b>Fruits &amp; Vegetables</b> |         |            |         |            |         |            |         |            |
| ≥5 servings/day                | Ref     |            | Ref     |            | Ref     |            |         |            |
| <5 servings/day                | 1.35*   | 1.06, 1.72 | 1.22    | 0.94, 1.59 | 0.98    | 0.68, 1.40 | NA      | NA         |
| <b>Currently smokers</b>       |         |            |         |            |         |            |         |            |
| No                             | Ref     |            | Ref     |            | Ref     |            | Ref     |            |
| Yes                            | 0.55*** | 0.47, 0.65 | 0.79*   | 0.65, 0.95 | 0.65    | 0.41, 1.05 | 0.8     | 0.47, 1.35 |
| <b>Smokeless tobacco use</b>   |         |            |         |            |         |            |         |            |
| No                             | Ref     |            | Ref     |            | Ref     |            | Ref     |            |
| Yes                            | 0.80**  | 0.68, 0.94 | 0.83*   | 0.7, 1     | 0.74**  | 0.63, 0.88 | 0.87    | 0.72, 1.04 |
| <b>Body Mass Index (BMI)</b>   |         |            |         |            |         |            |         |            |
| Normal                         | Ref     |            | Ref     |            | Ref     |            | Ref     |            |
| Underweight                    | 0.62*** | 0.50, 0.77 | 0.61*** | 0.49, 0.77 | 0.56*** | 0.45, 0.69 | 0.53*** | 0.42, 0.66 |
| Overweight                     | 2.25*** | 1.83, 2.77 | 1.96*** | 1.57, 2.45 | 1.69*** | 1.35, 2.12 | 1.62*** | 1.28, 2.05 |
| Obese                          | 4.53*** | 2.96, 6.93 | 3.7***  | 2.37, 5.79 | 2.99*** | 2.10, 4.25 | 2.59*** | 1.78, 3.75 |
| <b>Waist Circumference</b>     |         |            |         |            |         |            |         |            |
| Male: <90 cm/ Female: <80 cm   | Ref     |            | Ref     |            | Ref     |            | Ref     |            |
| Male: ≥90 cm/ Female: ≥80 cm   | 3.39*** | 2.78, 4.14 | \$      | \$         | 2.46*** | 2.06, 2.94 | \$      | \$         |
| <b>Self-reported Diabetes</b>  |         |            |         |            |         |            |         |            |
| No                             | Ref     |            | Ref     |            | Ref     |            | Ref     |            |
| Yes                            | 2.22*** | 1.72, 2.88 | 1.32    | 0.98, 1.77 | 2.45*** | 1.85, 3.23 | 1.73*** | 1.28, 2.34 |

\* p < 0.05, \*\* p < 0.01, \*\*\* p < 0.001; CI: Confidence Interval; COR: Crude Odds Ratio; AOR: Adjusted Odds Ratio;

NA: Not applicable, these variables were not included in the adjusted analysis as these were dropped due to the significance level was >0.2 in the crude analysis

\$: Although waist circumference was used in the final model, BMI is used here to produce a supplementary table to show to results of the analysis using BMI instead of waist circumference.

‡Never married, widow/widower, divorced and separated

‡‡Hindu, Buddhist, Christian and others
